# Supplementary material for: Conserved role of Ovo in germline development in mouse and Drosophila
Source: PubMed Central journal article supplement (PMC5216385; doi:10.1038/srep40056), 2017-01-06
Supplement: srep40056-s1.pdf [file srep40056-s1.pdf]

## ***Supplementary Information***

### **Conserved role of Ovo in germline development in mouse and *Drosophila***

**Makoto Hayashi<sup>#,1,2</sup>, Yuko Shinozuka<sup>#,1</sup>, Shuji Shigenobu<sup>3</sup>, Masanao Sato<sup>4</sup>,  
Michihiko Sugimoto<sup>†,5</sup>, Seiji Ito<sup>6</sup>, Kuniya Abe<sup>2,5</sup>  
and Satoru Kobayashi<sup>1,2\*</sup>**

<sup>1</sup>Life Science Center of Tsukuba Advanced Research Alliance (TARA Center), University of Tsukuba, Tsukuba, Ibaraki 305-8577, Japan

<sup>2</sup>Graduate School of Life and Environmental Sciences, University of Tsukuba, Tsukuba, Ibaraki 305-8572, Japan.

<sup>3</sup>Functional Genomics Facility, NIBB Core Research Facilities, National Institute for Basic Biology, Nishigonaka 38, Myodaiji, Okazaki 444-8585, Japan

<sup>4</sup>Laboratory of Applied Molecular Entomology, Division of Applied Bioscience, Graduate School of Agriculture, Hokkaido University, Sapporo, 060-8589, Japan

<sup>5</sup>Mammalian Genome Dynamics, RIKEN BioResource Center, Tsukuba, Ibaraki 305-0074, Japan

<sup>6</sup>Department of Medical Chemistry, Kansai Medical University, Moriguchi, 570-8506, Japan

<sup>#</sup>Contributed equally to this work.

<sup>\*</sup>Corresponding author: Satoru Kobayashi, E-mail: skob@tara.tsukuba.ac.jp

<sup>†</sup>Present Address: Division of Developmental Genetics, Institute of Resource Development and Analysis, Kumamoto University, 2-2-1 Honjo, Kumamoto, 860-0811, Japan

**Key Words:** primordial germ cells, germ line, germ plasm, *Drosophila*, mice

**Short Title:** Role of Ovo in germline development

## *Supplementary Materials and Methods*

### **EGFP knock-in mediated by CRISPR/Cas9**

The clustered regularly interspaced short palindromic repeat (CRISPR)/CRISPR-associated endonuclease (Cas9) system was used to generate enhanced green fluorescent protein (EGFP) knock-in alleles of the *ovo* locus by expressing the guide RNA (gRNA) and Cas9 in the presence of an EGFP knock-in construct. Using CRISPR Optimal Target Finder<sup>1</sup>, the EGFP knock-in sites were determined to be just downstream of the start codons of the Ovo-A and Ovo-B protein-coding region. The gRNA expression vectors were constructed as described<sup>2</sup>. The double-stranded DNAs with target sequences for *ovo-A* and *ovo-B* were constructed using pairs of complementary oligonucleotides, *ovoA-egfp-sgRNA-Fw/ovoA-egfp-sgRNA-Rv* and *ovoB-egfp-sgRNA-Fw/ovoB-egfp-sgRNA-Rv* (Supplementary Table S7), respectively, and cloned into *Bbs*I-digested pBFv-U6.2 vector<sup>2</sup>. These gRNA expression vectors were transformed into *y<sup>1</sup> v<sup>1</sup> nos-phiC31; attP40* (TBX-0002) to establish the gRNA-expressing fly lines U6.2-OvoA-Nterm and U6.2-OvoB-Nterm, as described<sup>2</sup>.

The EGFP knock-in construct contains the EGFP-coding region flanked by the regions 1

kb upstream and downstream of the Ovo-A or Ovo-B start codon. The EGFP coding sequence was amplified from pEGFP-N1 (Clontech) using primers pEGFP-N1-Fw and pEGFP-N1-Rv (Supplementary Table S7). The genomic regions upstream and downstream of the Ovo-A start codon was amplified from genomic DNA of  $y^2 cho^2 v^1$  (TBX-0004) using primer pairs ovoA-up1kb-Fw/ovoA-up1kb-Rv and ovoA-dwn1kb-Fw/ovoA-dwn1kb-Rv (Supplementary Table S7). Similarly, the genomic regions upstream and downstream of Ovo-B start codon were amplified using primer pairs ovoB-up1kb-Fw/ovoB-up1kb-Rv and ovoB-dwn1kb-Fw/ovoB-dwn1kb-Rv (Supplementary Table S7). Using Gibson Assembly (New England BioLabs), the upstream, EGFP-coding, and downstream regions were assembled in that order in a pBluescript II SK(+) fragment amplified using primer pairs pBlue-Fw and pBlue-Rv (Supplementary Table S7). Approximately 0.1 nl of solution containing the *ovo-A* or *ovo-B* knock-in constructs (150 ng/ $\mu$ l in distilled water) was injected into the embryos derived from  $y^2 cho^2 v^1$ ; *Sp/CyO*, *P{nos-Cas9, y+, v+}2A* (CAS-0004) females mated with U6.2-OvoA-Nterm or U6.2-OvoB-Nterm males, respectively. Progeny harboring the EGFP insertion at the *ovo-A* or *ovo-B* target site was screened by PCR, and used to establish stock lines.

### ***In situ* hybridization**

Whole-mount *in situ* hybridization of embryos was performed as described<sup>3,4</sup> with minor modifications as follows. cDNAs corresponding to the common and *svb*-specific regions were amplified from an embryonic cDNA library<sup>5</sup> using primer pairs ovo-probe-Fw/ovo-probe-Rv and *svb*-probe-Fw/*svb*-probe-Rv (Supplementary Table S7), respectively. These cDNAs were inserted between the T7 and T3 promoter regions of pBluescript II SK(+). Digoxigenin (DIG)-labeled antisense RNA probes were synthesized with T3 RNA polymerase (Roche) using fragments amplified from these plasmids using the T7 and T3 primers.

Signals were detected using either an alkaline phosphatase–conjugated anti-DIG Fab fragment (Roche) or a horseradish peroxidase–conjugated anti-DIG antibody (Roche). In the latter case, signal was amplified using the TSA Biotin System and Streptavidin-Texas Red (PerkinElmer). Double staining was performed as described<sup>4</sup>.

### **Quantitative RT-PCR (qRT-PCR) for *ovo-A* and *ovo-B* transcripts**

qRT-PCR was performed as described<sup>6</sup> with minor modifications as follows. cDNA

templates for qRT-PCR were synthesized from RNA extracted from PGCs. PGCs were sorted from embryos at 11 different developmental stages [Stage (St.) 4: 1 h 20 min – 2 h 20 min after egg laying (AEL); St.5–7: 2 h 20 min – 3 h 20 min AEL; St.8–9: 3 h 20 min – 4 h 20 min AEL; St.10: 4 h 20 min – 5 h 20 min AEL; St.11: 5 h 20 min – 7 h 20 min AEL; St.12: 7 h 20 min – 9 h 20 min AEL; St.13 – 14: 9 h 20 min – 11 h 20 min AEL; St.15: 11 h 20 min – 13 h 20 min AEL; St.16: 13 h 20 min – 16 h 20min AEL; St.17 (early): 16 h 20 min – 19 h 20 min AEL; St.17 (late): 19 h 20 min – 20 h AEL]<sup>7</sup>. Primer pairs used for amplifying *ovo-A*- and *ovo-B*-specific regions (Fig. 1a) were *ovo-A-Fw/ovo-A-Rv* and *ovo-B-Fw/ovo-B-Rv* (Supplementary Table S8), respectively. For amplification of *rp49*, primer pair *rp49-Fw/p49-Rv* (Supplementary Table S8) was used.

The absolute amounts of *ovo-A* and *ovo-B* transcripts were determined using external standards containing cDNAs whose nucleotide sequences are identical to those of the target sequences. This approach ensures equivalent amplification of standards and target sequences. Standard curves for each isoform were generated using a dilution series of *XbaI*-digested pBluescript II SK(+) containing an *ovo-A* or *ovo-B* cDNA fragment. cDNA fragments corresponding to *ovo-A* and *ovo-B* were amplified from an embryonic cDNA library<sup>5</sup> using

primer pairs ovoA-sp-Fw/ovoA-sp-Rv and ovoB-sp-Fw/ovoB-sp-Rv (Supplementary Table S7), respectively. Quantitation was performed using the ABI PRISM7000 Sequence Detection System (Applied Biosystems) and the QuantiTect SYBR Green PCR Kit (QIAGEN). Data were analyzed using Sequence Detection System Software 1.1 (Applied Biosystems) and Microsoft Excel (Microsoft). Comparing the  $C_T$  values of the *ovo-A* and *ovo-B* transcripts with standard curves allowed determination of absolute amounts. The amounts of target transcripts in PGCs from the 11 embryonic stages were normalized against the  $C_T$  values of the control gene (*rp49*). Three independent experiments using independent pools of PGCs were carried out.

### **Immunostaining**

Immunofluorescence staining of embryos and larval gonads was carried out as described<sup>3,4</sup>. Larval gonads were dissected from first ( $36\pm 2$  h AEL), second ( $60\pm 2$  h AEL), and wandering third instar larvae. The following primary antibodies were used at the indicated dilutions: rabbit anti-Vasa (1:1500), rabbit anti-GFP (1:500, A11122; Life Technologies), chick anti-Vasa (1:500), mouse anti-Sxl [1:25, M18; Developmental Studies

Hybridoma Bank (DSHB)], and mouse anti-Fas3 antibody (1:50, 7G10; DSHB). For primary antibody detection, the following secondary antibodies were used: Alexa Fluor 488–conjugated goat anti-rabbit IgG (1:1000; Molecular Probe), Alexa Fluor 546–conjugated goat anti-chick IgY (1:500; Molecular Probe), and Alexa Fluor 568– or Alexa Fluor 647–conjugated goat anti-mouse IgG antibody (1:300; Molecular Probe). Stained embryos and gonads were mounted in Vectashield (Vector Laboratories) and observed under a confocal microscope (Leica Microsystems).

### **Microarray analysis of Ovo-B KD PGCs**

Using fluorescence-activated cell sorting (FACS) as described<sup>6</sup>, PGCs for microarray analysis were isolated from St.16 embryos (13 h 20 min – 16 h 20 min AEL) derived from females homozygous for *EGFP-vasa* and *nos-Gal4* mated with *UASp-Ovo-A (line#4-2)* (Ovo-B KD) or *y w* males (control). Total RNA was isolated from PGCs using the RNeasy Plus Micro kit (QIAGEN). cDNA was synthesized and amplified from 10 ng of total RNA from each sample using the Ovation PicoSL WTA System (NuGEN). The cDNAs were labeled with Cy3 using NimbleGen One-Color Labeling Kit (Roche). *Drosophila* V2 oligo

microarrays, which contain probes for 13,936 genes (GPL17080) were hybridized with 1.65  $\mu\text{g}$  of Cy3-labeled cDNAs and washed using the Gene Expression Wash Buffer Kit (Agilent Technologies). The hybridized arrays were scanned using the G2505C Microarray Scanner (Agilent Technologies). Signal data were extracted using Feature Extraction ver.10.7 (Agilent Technologies). Microarray data were deposited in GEO under Accession No. GSE81857.

Raw values were normalized across samples using quantile normalization. For each probe, the following linear model was fitted to the normalized expression values:

$$E_{ij} \sim G_i + R_j + \varepsilon_{ij}$$

where  $E$  is  $\log_2$  signal intensity of the normalized expression value;  $G$  and  $R$  are genotype and replicate effects, respectively; and  $\varepsilon$  is the residual. Significance was calculated for  $G_i$ .

P-values were corrected for multiple tests using the Storey false discovery rate to obtain q-values<sup>8</sup>. The expression of endogenous *vas* and *nos* could not be examined: the microarrays we used contain no probe for the *vas* transcript, and the *nos* probe is designed to hybridize with the *nos* 3'UTR region, which allows detection of the transcript over-expressed from the *UASp-Ovo-A* transgene (see "Transgene" in Materials and Methods) as well as the endogenous *nos* transcript.



Gene ontology (GO) analysis for the genes down- and up-regulated in Ovo-B KD PGCs was performed by using DAVID 6.7 (<https://david.ncifcrf.gov>). Spatio-temporal expression of the genes down-regulated in Ovo-B KD PGCs were determined by using BDGP WISH database (<http://www.fruitfly.org>).

### **Microarray analysis of PGCs and whole embryos**

To identify PGC-enriched genes, gene expression was compared between PGCs and whole embryos by microarray analysis. PGCs were isolated from St.16 *EGFP-vasa* embryos (13 h 20 min – 16 h 20 min AEL) by FACS as described<sup>6</sup>. Whole *EGFP-vasa* embryos were collected at various stages (1 h 20 min – 13 h 20 min AEL). Total RNA was extracted from isolated PGCs and whole embryos using the RNeasy Mini kit (QIAGEN). Extracted RNA was amplified as cRNA labeled with cyanine-3 CTP (Cy3) or cyanine-5 CTP (Cy5) using the Agilent Low RNA Input Fluorescent Linear Amplification Kit (Agilent Technologies). Custom-made 22K 60-mer oligo microarrays (Agilent Technologies) that contain 21,925 probes representing almost all of the predicted *Drosophila* transcripts were used (GPL4336). Each array was hybridized with 1 µg of both Cy3-labeled and Cy5-labeled cRNA and washed

according to the Agilent protocol. Dye-swap experiments were also carried out. Subsequently, arrays were scanned on a G2565BA Microarray Scanner System (Agilent Technologies).

Signal data were extracted using the Feature Extraction 7.1 software (Agilent Technologies).

Data obtained from four independent biological replicates were deposited in GEO under Accession No. GSE83460.

Log<sub>2</sub> ratio values from two-color microarray experiments were normalized across samples from all developmental stages, and the estimated expression values of each gene at each developmental stage were obtained using the *limma* package in R (<https://bioconductor.org/packages/release/bioc/html/limma.html>). Using the `lmscFit` function, the following model was fitted to the normalized log<sub>2</sub> expression values:

$$E_{ij} \sim C_i + D_j + \varepsilon_{ij}$$

where  $E$  is log<sub>2</sub> signal intensity of the normalized expression value;  $C$  and  $D$  are cell types [PGCs at 11 developmental stages and whole embryos (soma)] and dye effects, respectively; and  $\varepsilon$  is the residual. The sums of intercept and  $C_i$  for each probe of stage-16 PGCs and soma were used as estimated expression values. Significance was calculated for differences between the estimated values of stage-16 PGCs and soma. The P-values were corrected for

multiple tests using Holm's method.

### **Quantitative RT-PCR for *vas* and *nos***

Because our microarray analysis could not detect expression of endogenous *vas* and *nos* (see above), the expression levels of *vas* and *nos* were analyzed by qRT-PCR. cDNAs synthesized for microarray analysis of Ovo-B KD and control PGCs (see above) were used as templates for qRT-PCR. *vas* and *nos* were amplified using primer pairs *vas*-Fw/*vas*-Rv and *nos*-Fw/*nos*-Rv (Supplementary Table S8), respectively. *CG14967* was used as an internal control because its expression was not affected by Ovo-B KD in PGCs. *CG14967* was amplified using primer pair *CG14967*-Fw/*CG14967*-Rv (Supplementary Table S8).

Quantitation was performed using the Light Cycler 480 system (Roche) and the QuantiTect SYBR Green RT-PCR Kit (QIAGEN). Thermal cycling conditions were as follows: 50°C for 2 min and 95°C for 15 min, followed by 45 cycles of 15 sec at 94°C, 30 sec at 55°C, and 30 sec at 72°C. Data were analyzed using the Light Cycler Software (Roche) and Microsoft Excel (Microsoft). Relative expression values of target genes were normalized against the internal control (*CG14967*). Three independent experiments were carried out

using independent pools of PGCs.

### ***Supplementary Figures***

Supplementary Figure S1. Expression of maternal and zygotic Ovo-A protein during embryogenesis.

Embryos were stained for GFP (green), Vasa (red), and nuclear DNA (DAPI, blue) at the indicated stages. The Ovo-A-EGFP fusion protein (green) was not detectable in PGCs (red) of embryos derived from the females homozygous for *ovoA-Nterm-egfp* mated with males hemizygous for *ovoA-Nterm-egfp*. In lower panels, only GFP signals (green) are shown. Scale bar: 20  $\mu\text{m}$ .

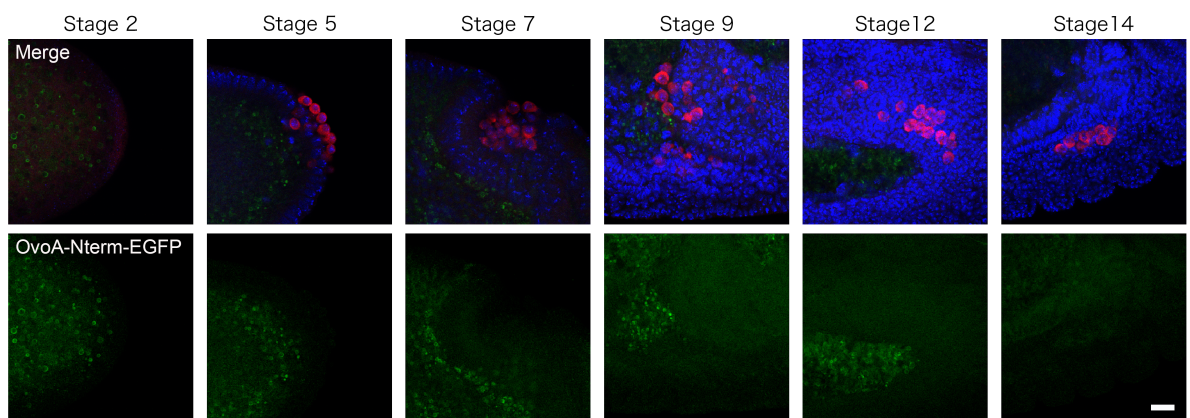

Supplementary Figure S1

Supplementary Figure S2. UAS-dependent gene expression induced by maternal or zygotic *nos-Gal4*.

(a and b) YFP-positive embryos derived from *nos-Gal4/TM6B, Dfd-GMR-nvYFP* females mated with males homozygous for *UASp-GFP* (a) and the embryos derived from *UASp-GFP* homozygous females mated with males homozygous for *nos-Gal4* (b) were stained for GFP (green), Vasa (red), and nuclear DNA (DAPI, blue). In lower panels, only GFP signals (green) are shown. GFP expression driven by maternal *nos-Gal4* was detected in PGCs (red) from stage 11 until stage 16 (a). By contrast, GFP expression driven by zygotic *nos-Gal4* was detected in PGCs (red) from stage 15 (b) to adulthood (data not shown). Scale bar: 20  $\mu\text{m}$ .

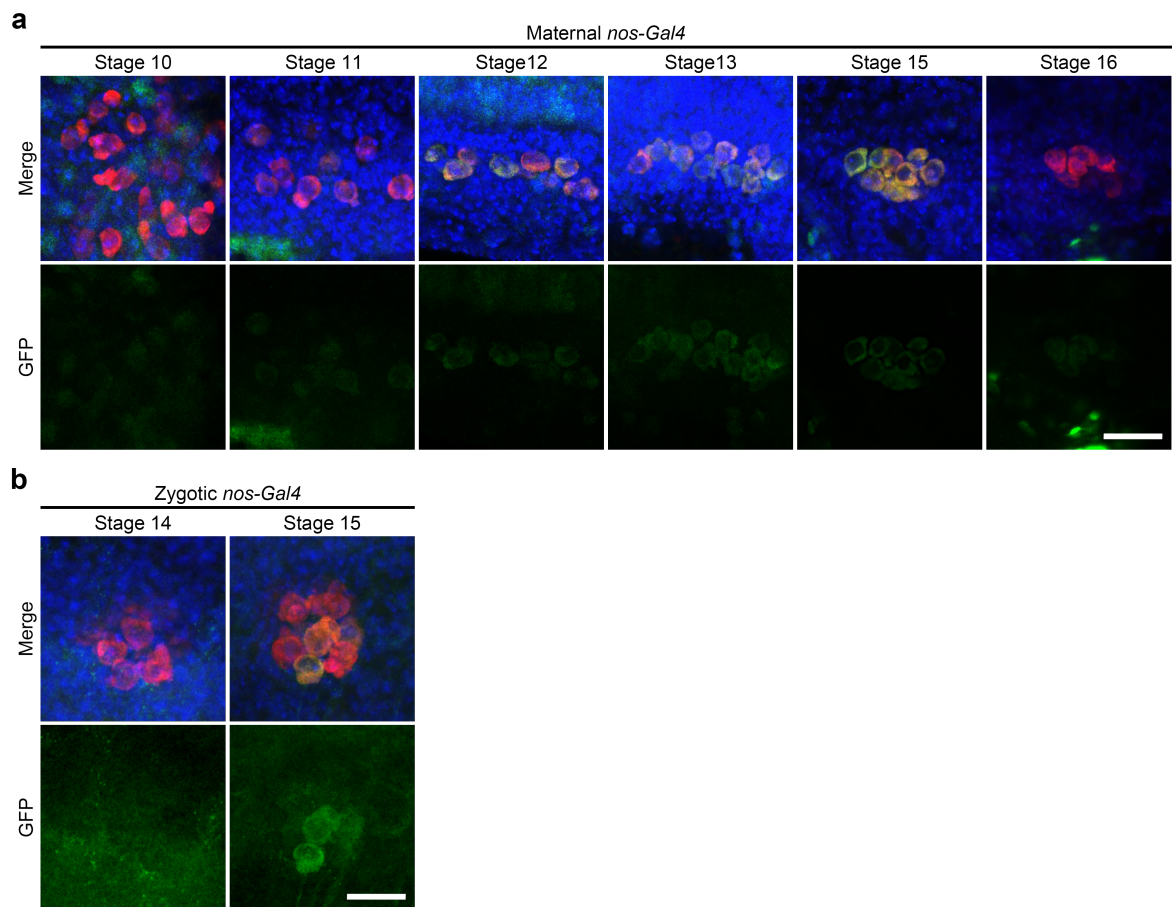

Supplementary Figure S2



Supplementary Figure S3. Ovo-A overexpression caused a loss of germline cells.

(a–d) Distribution of the number of Vasa-positive germline cells per gonad of Ovo-A–expressing (red and orange) females (a and c) and males (b and d) at embryonic stage 15–16, spanning the first through third instar larval stages. Ovo-A was expressed under the control of mZNG4 in progeny derived from females homozygous for *nos-Gal4* mated with males homozygous for *UASp-Ovo-A* [line#7 (red) and line#8 (orange)] (a and b). Furthermore, Ovo-A was over-expressed under the control of mNG4 in YFP-positive progeny derived from *nos-Gal4/TM6B, Dfd-GMR-nvYFP* females mated with males homozygous for *UASp-Ovo-A* (line#7) (red bars in c and d). As a control, progeny derived from females homozygous for *nos-Gal4* homozygous mated with *y w* males (blue bars in Fig. 2a and b) and YFP-positive progeny derived from *nos-Gal4/TM6B, Dfd-GMR-nvYFP* females mated with *y w* males were used (blue bars in Fig. 2c and d). Significance of difference relative to controls (Fig. 2a–d) was calculated using Fisher's exact test (\*  $P < 0.05$ , \*\*  $P < 0.01$ ). *N*: the number of gonads observed. (e–f) Percentages of agametic (red) and non-agametic (blue) ovaries (e) and testes (f) of adult progeny derived from females homozygous for *nos-Gal4* mated with males homozygous for *UASp-Ovo-A* (line#7 or line#8) (Ovo-A o/e by mZNG4) or from females homozygous for *ovo<sup>amk</sup>* and *nos-Gal4* mated with males homozygous for *UASp-Ovo-A* (line#7 or line#8) (*ovo<sup>amk</sup>* and Ovo-A o/e by mZNG4), and from YFP-positive adult progeny derived from *nos-Gal4/TM6B, Dfd-GMR-nvYFP* females mated with males homozygous *UASp-Ovo-A* (line#7) (Ovo-A o/e by mNG4) are shown. The number of gonads examined is shown in parentheses. Gonads without Vasa staining were categorized as agametic. Significance of differences vs. control-1 (Fig. 2e and j) (\*  $P < 0.01$ ), “Ovo-A o/e by mZNG4” (\*\*  $P < 0.01$ ), or control-2 (Fig. 2h and m) (\*\*\*)  $P < 0.01$ , #  $P > 0.05$ ) was calculated by Fischer's exact test.

Ovo-A o/e by mZNG4

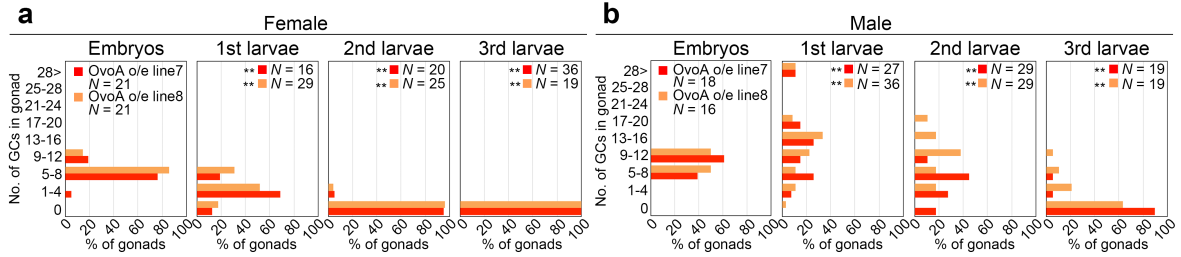

Ovo-A o/e by mNG4

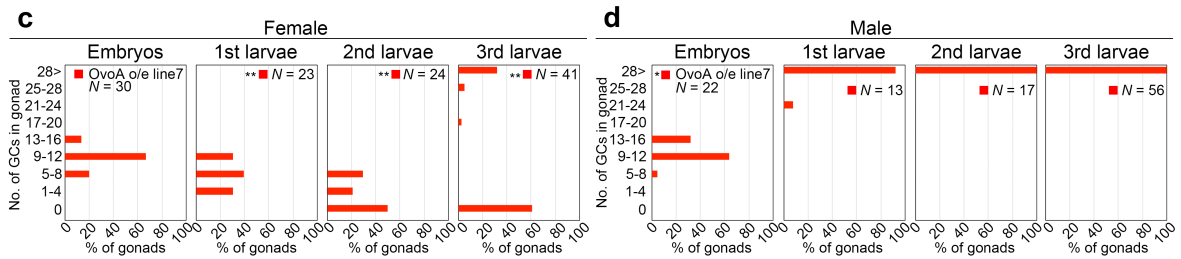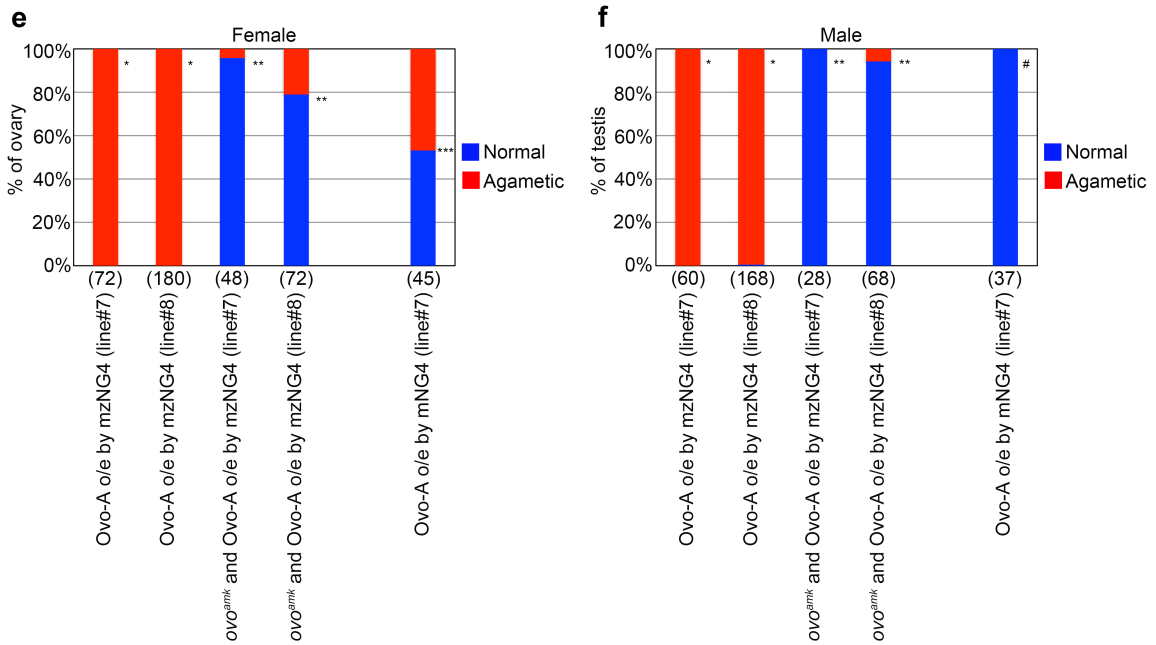

Supplementary Figure S3

## Supplementary Table S1. List of genes down-regulated in Ovo-B KD PGCs

\* This table shows the names of genes and probes whose expression levels were significantly down-regulated in Ovo-A-expressing PGCs in comparison with control PGCs ( $q$ -value  $< 0.05$ ; see SI Materials and Methods).

† Using a linear model, the intercept and genotype effect ( $G$ ) values were calculated for each probe (see SI Materials and Methods). The intercept value represents the estimated expression value in one of the biological replicates of Ovo-A-expressing PGCs in  $\log_2$  scale. The genotype effect value represents the estimated fold change (control PGCs / Ovo-A-expressing PGCs) in  $\log_2$  scale.

‡ The five genes, of which expression patterns are annotated only with ontology terms "germ cells and/or gonads" at stage 13-16 in BDGP WISH database.

| Gene Name*          | Feature Number<br>(GPL17080) | Probe Name*  | Intercept† | Genotype effect<br>[Fold Change:<br>$\log_2(\text{Cont./Ovo-A oe})$ † | p-value    | q-value |
|---------------------|------------------------------|--------------|------------|-----------------------------------------------------------------------|------------|---------|
| Aac11               | 37457                        | A_09_P080016 | 10.32157   | 0.98231                                                               | 1.654.E-03 | 0.03114 |
|                     | 40715                        | A_09_P080016 | 10.31244   | 1.05273                                                               | 1.545.E-03 | 0.03029 |
|                     | 41427                        | A_09_P136550 | 8.35646    | 1.22363                                                               | 4.017.E-04 | 0.01553 |
|                     | 25414                        | A_09_P146835 | 10.64688   | 1.05329                                                               | 7.077.E-04 | 0.02035 |
| aay                 | 30941                        | A_09_P033236 | 7.23632    | 2.15550                                                               | 1.432.E-05 | 0.00614 |
|                     | 3792                         | A_09_P033236 | 7.27678    | 2.30735                                                               | 9.398.E-06 | 0.00581 |
| Acf1                | 5530                         | A_09_P079851 | 9.71238    | 0.89283                                                               | 1.453.E-03 | 0.02919 |
| adp                 | 33391                        | A_09_P041196 | 9.88703    | 0.81339                                                               | 2.403.E-03 | 0.03686 |
|                     | 20001                        | A_09_P041196 | 10.04108   | 0.89528                                                               | 1.940.E-03 | 0.03363 |
| alpha-Est10         | 3628                         | A_09_P030956 | 6.50639    | 1.87697                                                               | 3.636.E-05 | 0.00750 |
|                     | 25877                        | A_09_P030956 | 6.58602    | 1.93596                                                               | 2.321.E-04 | 0.01246 |
|                     | 19336                        | A_09_P209670 | 7.74439    | 2.39547                                                               | 6.884.E-05 | 0.00827 |
| alpha-Est3          | 33886                        | A_09_P030966 | 6.43497    | 1.85167                                                               | 6.267.E-05 | 0.00827 |
|                     | 29917                        | A_09_P030966 | 6.25633    | 1.92696                                                               | 4.205.E-05 | 0.00750 |
|                     | 31459                        | A_09_P197385 | 8.42126    | 1.36907                                                               | 1.976.E-04 | 0.01176 |
|                     | 33181                        | A_09_P197645 | 8.23335    | 1.52312                                                               | 8.114.E-05 | 0.00873 |
| alpha-Est4          | 19915                        | A_09_P030971 | 7.01767    | 0.84143                                                               | 3.341.E-03 | 0.04240 |
| alpha-Est9          | 10290                        | A_09_P030996 | 5.28864    | 1.02240                                                               | 4.124.E-03 | 0.04693 |
| Ank2                | 2723                         | A_09_P004301 | 3.01758    | 2.37078                                                               | 1.332.E-03 | 0.02801 |
|                     | 9154                         | A_09_P004301 | 3.48722    | 3.07716                                                               | 2.112.E-06 | 0.00581 |
|                     | 12337                        | A_09_P185680 | 4.28029    | 2.99650                                                               | 2.371.E-04 | 0.01260 |
|                     | 31220                        | A_09_P207160 | 4.65697    | 1.48125                                                               | 1.192.E-03 | 0.02657 |
| Aprt                | 33149                        | A_09_P041311 | 6.75051    | 1.63924                                                               | 1.035.E-04 | 0.00938 |
|                     | 29686                        | A_09_P041311 | 6.82298    | 1.69535                                                               | 6.288.E-05 | 0.00827 |
| ase                 | 9137                         | A_09_P041351 | 5.12327    | 1.41384                                                               | 5.405.E-04 | 0.01786 |
|                     | 7010                         | A_09_P041351 | 4.89700    | 1.61071                                                               | 3.822.E-04 | 0.01519 |
| asparagine-syntheta |                              |              |            |                                                                       |            |         |
| se                  | 35336                        | A_09_P064326 | 5.42830    | 1.32233                                                               | 3.867.E-04 | 0.01526 |
|                     | 34717                        | A_09_P064326 | 5.66289    | 1.37769                                                               | 4.485.E-04 | 0.01634 |
| Asph                | 33022                        | A_09_P008181 | 8.36778    | 1.86614                                                               | 2.896.E-05 | 0.00710 |
|                     | 28912                        | A_09_P008181 | 8.18493    | 1.95720                                                               | 2.085.E-05 | 0.00643 |
|                     | 735                          | A_09_P008186 | 8.72008    | 2.18435                                                               | 2.987.E-05 | 0.00710 |
|                     | 17356                        | A_09_P008186 | 8.68104    | 2.26378                                                               | 6.561.E-05 | 0.00827 |
| Atg8b               | 20994                        | A_09_P076271 | 5.92939    | 1.31333                                                               | 1.638.E-03 | 0.03107 |
| aub                 | 18373                        | A_09_P041376 | 9.69325    | 1.17719                                                               | 8.977.E-04 | 0.02299 |
|                     | 24248                        | A_09_P041376 | 9.65453    | 1.19538                                                               | 1.365.E-03 | 0.02826 |
| barr                | 5137                         | A_09_P030186 | 9.28323    | 0.77964                                                               | 3.954.E-03 | 0.04588 |
| beat-Ib             | 8305                         | A_09_P065511 | 1.95102    | 2.52072                                                               | 5.015.E-05 | 0.00761 |
|                     | 906                          | A_09_P108505 | 4.85534    | 0.96449                                                               | 2.125.E-03 | 0.03511 |
| Best3               | 42707                        | A_09_P056206 | 4.01208    | 0.99697                                                               | 3.650.E-03 | 0.04435 |
|                     | 41783                        | A_09_P113085 | 3.27630    | 1.08598                                                               | 9.924.E-04 | 0.02419 |
| BicC                | 20485                        | A_09_P041451 | 7.66174    | 0.76115                                                               | 3.416.E-03 | 0.04279 |
|                     | 28078                        | A_09_P041451 | 7.50782    | 0.86565                                                               | 2.743.E-03 | 0.03884 |
|                     | 38759                        | A_09_P166245 | 8.27535    | 0.87552                                                               | 1.767.E-03 | 0.03209 |
| bwa                 | 43918                        | A_09_P128290 | 7.41807    | 1.47779                                                               | 1.289.E-04 | 0.01012 |
| call                | 13459                        | A_09_P076046 | 11.03067   | 0.75157                                                               | 4.219.E-03 | 0.04735 |
| Cam                 | 2143                         | A_09_P041566 | 12.49561   | 1.34875                                                               | 7.138.E-04 | 0.02042 |

|         |       |              |          |         |            |         |
|---------|-------|--------------|----------|---------|------------|---------|
|         | 23064 | A_09_P041566 | 12.59724 | 1.42995 | 5.398.E-04 | 0.01786 |
|         | 39478 | A_09_P044926 | 12.51778 | 0.97765 | 1.032.E-03 | 0.02456 |
|         | 4351  | A_09_P045311 | 12.60792 | 1.32715 | 1.144.E-03 | 0.02602 |
|         | 31138 | A_09_P049811 | 11.97452 | 1.17526 | 5.413.E-04 | 0.01786 |
|         | 6141  | A_09_P138090 | 7.82437  | 0.96985 | 1.027.E-03 | 0.02455 |
|         | 7059  | A_09_P203390 | 6.00147  | 1.75227 | 6.741.E-05 | 0.00827 |
| CAP     | 27189 | A_09_P006051 | 9.34594  | 0.94458 | 1.404.E-03 | 0.02859 |
|         | 15393 | A_09_P006051 | 9.33066  | 1.08496 | 5.486.E-04 | 0.01805 |
| caps    | 38870 | A_09_P033216 | 4.42489  | 1.27413 | 6.940.E-04 | 0.02015 |
|         | 19437 | A_09_P033216 | 4.58418  | 1.51769 | 3.556.E-04 | 0.01468 |
| Cda4    | 32802 | A_09_P015706 | 7.49458  | 0.94063 | 4.365.E-03 | 0.04825 |
|         | 18799 | A_09_P015706 | 7.55046  | 1.00867 | 2.428.E-03 | 0.03690 |
| cdc16   | 11243 | A_09_P104455 | 9.51242  | 0.84461 | 2.313.E-03 | 0.03637 |
| CDC45L  | 20767 | A_09_P148800 | 7.26631  | 0.73759 | 4.172.E-03 | 0.04708 |
| Cdk4    | 4238  | A_09_P031536 | 9.67385  | 1.26860 | 6.744.E-04 | 0.01989 |
|         | 37990 | A_09_P031536 | 9.33360  | 1.37437 | 6.246.E-04 | 0.01917 |
|         | 1291  | A_09_P121720 | 6.55510  | 1.17213 | 5.669.E-04 | 0.01842 |
| CG10006 | 26681 | A_09_P056061 | 5.01362  | 2.01777 | 1.144.E-04 | 0.00959 |
|         | 42361 | A_09_P056061 | 4.69425  | 2.59110 | 2.876.E-04 | 0.01353 |
|         | 27343 | A_09_P128945 | 6.24677  | 1.63540 | 2.585.E-04 | 0.01293 |
| CG10165 | 21343 | A_09_P023521 | 7.45813  | 1.39715 | 2.843.E-03 | 0.03952 |
| CG10183 | 40671 | A_09_P070711 | 2.48554  | 1.37429 | 4.268.E-03 | 0.04763 |
| CG10200 | 5827  | A_09_P007801 | 4.75034  | 0.85217 | 1.944.E-03 | 0.03364 |
| CG10747 | 11506 | A_09_P023676 | 8.42671  | 0.90017 | 3.455.E-03 | 0.04299 |
|         | 16108 | A_09_P023676 | 8.30227  | 0.99061 | 1.978.E-03 | 0.03392 |
| CG10752 | 32402 | A_09_P055546 | 0.70207  | 1.20820 | 9.231.E-04 | 0.02338 |
| CG10863 | 10365 | A_09_P079556 | 8.48285  | 1.55662 | 1.285.E-04 | 0.01012 |
|         | 23583 | A_09_P079556 | 8.16307  | 1.71623 | 2.152.E-04 | 0.01210 |
| CG10920 | 19187 | A_09_P067961 | 4.20115  | 0.77743 | 3.803.E-03 | 0.04484 |
| CG11095 | 11846 | A_09_P038546 | 7.20069  | 0.82508 | 4.150.E-03 | 0.04697 |
|         | 28679 | A_09_P038546 | 6.83729  | 0.88011 | 2.257.E-03 | 0.03604 |
| CG11298 | 44605 | A_09_P026426 | 4.33022  | 0.76351 | 3.468.E-03 | 0.04303 |
| CG11357 | 23699 | A_09_P052756 | 8.01929  | 0.91966 | 3.062.E-03 | 0.04079 |
|         | 31359 | A_09_P052756 | 7.93358  | 0.98132 | 1.899.E-03 | 0.03334 |
| CG11368 | 33157 | A_09_P063806 | 1.23176  | 4.26079 | 8.741.E-04 | 0.02267 |
|         | 40236 | A_09_P063806 | 1.52214  | 4.42414 | 4.080.E-05 | 0.00750 |
| CG11382 | 43541 | A_09_P062866 | 5.12054  | 2.75692 | 1.209.E-05 | 0.00598 |
| CG11409 | 27879 | A_09_P076921 | 8.77723  | 1.04320 | 8.052.E-04 | 0.02169 |
|         | 2094  | A_09_P076921 | 8.99133  | 1.09515 | 6.269.E-04 | 0.01922 |
| CG11638 | 9106  | A_09_P062786 | 8.78851  | 1.53144 | 1.784.E-04 | 0.01142 |
|         | 20495 | A_09_P062786 | 8.73855  | 1.59887 | 1.047.E-04 | 0.00943 |
|         | 33878 | A_09_P199575 | 8.15624  | 1.72822 | 1.853.E-04 | 0.01155 |
| CG12001 | 5986  | A_09_P036121 | 5.94409  | 0.76267 | 3.752.E-03 | 0.04465 |
| CG12050 | 2128  | A_09_P023941 | 9.50208  | 0.81181 | 3.004.E-03 | 0.04034 |
|         | 14556 | A_09_P023941 | 9.93627  | 0.92850 | 1.298.E-03 | 0.02759 |
| CG12106 | 2728  | A_09_P068481 | 5.10372  | 1.31586 | 3.847.E-04 | 0.01525 |
|         | 7318  | A_09_P068481 | 5.35448  | 1.35478 | 6.986.E-04 | 0.02022 |
| CG12325 | 27057 | A_09_P006231 | 8.21833  | 1.39413 | 2.741.E-04 | 0.01328 |
| CG12344 | 30433 | A_09_P006236 | 8.64540  | 1.15872 | 1.181.E-03 | 0.02646 |
|         | 27637 | A_09_P006236 | 8.60240  | 1.23824 | 6.559.E-04 | 0.01965 |
| CG12355 | 38115 | A_09_P063616 | 6.59449  | 1.54356 | 1.563.E-04 | 0.01068 |
|         | 32158 | A_09_P063616 | 6.68681  | 1.58538 | 1.058.E-04 | 0.00943 |
| CG12426 | 18317 | A_09_P161150 | 1.82124  | 3.79012 | 7.916.E-05 | 0.00859 |
| CG12477 | 24914 | A_09_P113955 | 9.47612  | 0.76651 | 3.675.E-03 | 0.04451 |
| CG12499 | 1544  | A_09_P070216 | 11.52412 | 0.75358 | 4.512.E-03 | 0.04910 |
|         | 4622  | A_09_P070216 | 11.78475 | 0.76818 | 4.077.E-03 | 0.04661 |
| CG12546 | 583   | A_09_P035811 | 1.42836  | 1.36016 | 1.527.E-03 | 0.03005 |
| CG12637 | 19560 | A_09_P037416 | 5.77028  | 1.37289 | 1.730.E-03 | 0.03201 |
| CG12680 | 2111  | A_09_P067141 | 7.82616  | 1.72783 | 1.950.E-04 | 0.01174 |
|         | 19203 | A_09_P067141 | 7.85123  | 1.85752 | 1.390.E-04 | 0.01036 |
| CG12689 | 33280 | A_09_P067926 | 4.50617  | 1.65832 | 2.422.E-03 | 0.03688 |
|         | 9996  | A_09_P067926 | 4.47451  | 1.79117 | 2.747.E-03 | 0.03888 |
| CG12708 | 23190 | A_09_P039076 | 2.33542  | 0.80594 | 2.481.E-03 | 0.03718 |
| CG12744 | 38336 | A_09_P005866 | 9.92984  | 1.65729 | 8.590.E-05 | 0.00882 |
|         | 25426 | A_09_P005866 | 9.81996  | 1.67930 | 6.193.E-05 | 0.00827 |

|          |       |              |          |         |            |         |
|----------|-------|--------------|----------|---------|------------|---------|
|          | 13616 | A_09_P150055 | 9.63559  | 1.73275 | 5.628.E-05 | 0.00791 |
| CG1275   | 44337 | A_09_P028681 | 5.71315  | 1.41303 | 2.081.E-03 | 0.03490 |
|          | 25209 | A_09_P028681 | 5.77021  | 1.65111 | 1.747.E-03 | 0.03204 |
| CG12851  | 12656 | A_09_P027781 | 8.20663  | 1.17127 | 3.427.E-04 | 0.01453 |
|          | 4842  | A_09_P027781 | 8.20895  | 1.20807 | 3.530.E-04 | 0.01463 |
| CG12972  | 33256 | A_09_P035431 | 7.30774  | 1.52066 | 9.672.E-04 | 0.02396 |
|          | 66    | A_09_P035431 | 7.23510  | 1.59600 | 9.887.E-04 | 0.02417 |
| CG12991  | 29187 | A_09_P213420 | 7.21005  | 0.77672 | 2.969.E-03 | 0.04018 |
| CG12994  | 41226 | A_09_P216825 | 7.23972  | 1.01152 | 8.678.E-04 | 0.02262 |
| CG13202  | 34832 | A_09_P006451 | 3.14683  | 0.98959 | 2.920.E-03 | 0.03996 |
|          | 39724 | A_09_P006451 | 3.27793  | 1.16248 | 3.127.E-03 | 0.04112 |
| CG13350  | 28127 | A_09_P007501 | 7.67760  | 0.85758 | 2.086.E-03 | 0.03494 |
|          | 34758 | A_09_P007501 | 7.64939  | 0.86338 | 2.701.E-03 | 0.03841 |
| CG13511  | 36301 | A_09_P026586 | 3.98298  | 0.99281 | 2.956.E-03 | 0.04013 |
| CG13560  | 6946  | A_09_P027071 | 2.78546  | 0.93835 | 3.326.E-03 | 0.04235 |
| CG13594  | 28178 | A_09_P027631 | 6.96266  | 0.80652 | 2.772.E-03 | 0.03903 |
| CG13690  | 9136  | A_09_P017941 | 9.75245  | 0.91053 | 1.776.E-03 | 0.03209 |
| CG13741† | 24688 | A_09_P005567 | 9.64566  | 1.18152 | 8.008.E-04 | 0.02168 |
| CG13784  | 7720  | A_09_P020291 | 2.88692  | 0.82950 | 2.580.E-03 | 0.03785 |
|          | 41019 | A_09_P020291 | 2.68332  | 1.01805 | 2.096.E-03 | 0.03496 |
| CG13822  | 15227 | A_09_P070721 | 5.59888  | 0.80389 | 4.647.E-03 | 0.04987 |
|          | 23383 | A_09_P070721 | 5.61122  | 0.87476 | 2.986.E-03 | 0.04025 |
| CG1387   | 4865  | A_09_P068226 | 6.04485  | 1.48945 | 1.775.E-03 | 0.03209 |
|          | 12252 | A_09_P068226 | 6.04129  | 1.61466 | 3.151.E-03 | 0.04125 |
| CG14050  | 37880 | A_09_P210345 | 7.82902  | 1.16320 | 4.568.E-03 | 0.04943 |
| CG14059  | 13851 | A_09_P128920 | 5.42325  | 0.71772 | 4.271.E-03 | 0.04764 |
| CG14085  | 30359 | A_09_P034551 | 6.37753  | 0.94123 | 3.046.E-03 | 0.04065 |
| CG14186  | 278   | A_09_P034866 | 4.37595  | 2.17817 | 3.642.E-05 | 0.00750 |
|          | 21623 | A_09_P034866 | 4.50048  | 2.36274 | 2.085.E-05 | 0.00643 |
| CG14305  | 33080 | A_09_P068916 | 5.13187  | 1.00760 | 2.322.E-03 | 0.03637 |
|          | 24010 | A_09_P068916 | 5.05873  | 1.24524 | 5.868.E-04 | 0.01866 |
| CG14342  | 22558 | A_09_P112510 | 1.38007  | 1.28992 | 5.408.E-04 | 0.01786 |
| CG14416  | 38376 | A_09_P062791 | 5.33423  | 0.88506 | 4.697.E-03 | 0.04995 |
|          | 16939 | A_09_P062791 | 5.24178  | 0.93274 | 2.144.E-03 | 0.03536 |
| CG1444   | 35764 | A_09_P068016 | 11.43826 | 1.32939 | 1.848.E-04 | 0.01154 |
|          | 16966 | A_09_P068016 | 11.68812 | 1.40244 | 1.549.E-04 | 0.01068 |
| CG14512  | 4728  | A_09_P060841 | 8.02411  | 0.89620 | 1.944.E-03 | 0.03364 |
|          | 6849  | A_09_P060841 | 7.98078  | 0.95377 | 2.021.E-03 | 0.03429 |
| CG14516  | 7384  | A_09_P060846 | 7.40871  | 2.71779 | 7.148.E-06 | 0.00581 |
| CG14668  | 42775 | A_09_P036316 | 4.87505  | 1.09886 | 1.928.E-03 | 0.03358 |
| CG14694  | 36795 | A_09_P073631 | 10.42576 | 0.86087 | 3.291.E-03 | 0.04210 |
|          | 2159  | A_09_P073631 | 10.56933 | 0.89052 | 2.514.E-03 | 0.03746 |
| CG14764  | 44666 | A_09_P024961 | 2.93409  | 3.48030 | 7.736.E-05 | 0.00851 |
|          | 42721 | A_09_P024961 | 2.69037  | 3.66118 | 4.456.E-05 | 0.00750 |
| CG14805  | 912   | A_09_P076491 | 9.33523  | 0.71733 | 4.311.E-03 | 0.04785 |
|          | 11313 | A_09_P076491 | 9.22642  | 0.84775 | 2.602.E-03 | 0.03798 |
| CG14835  | 4468  | A_09_P053571 | 1.70484  | 2.17139 | 1.103.E-05 | 0.00591 |
| CG14837  | 19097 | A_09_P053626 | 6.69840  | 1.16946 | 3.632.E-04 | 0.01472 |
|          | 37544 | A_09_P053626 | 6.80898  | 1.25208 | 3.102.E-04 | 0.01411 |
| CG14838† | 33383 | A_09_P053641 | 4.72046  | 1.34161 | 6.599.E-04 | 0.01967 |
|          | 43585 | A_09_P053641 | 4.86660  | 1.34592 | 4.846.E-04 | 0.01690 |
|          | 4557  | A_09_P117265 | 4.28782  | 2.59786 | 1.772.E-04 | 0.01142 |
| CG14913  | 37482 | A_09_P021886 | 4.02092  | 0.90925 | 2.720.E-03 | 0.03857 |
| CG15034  | 41344 | A_09_P067896 | 6.95372  | 1.50397 | 1.084.E-04 | 0.00943 |
|          | 5850  | A_09_P144060 | 7.30473  | 1.17709 | 2.574.E-03 | 0.03783 |
| CG15035  | 33094 | A_09_P067911 | 5.77756  | 1.24637 | 1.855.E-03 | 0.03297 |
| CG15036  | 42245 | A_09_P063801 | 5.99876  | 2.83734 | 4.205.E-04 | 0.01584 |
|          | 43385 | A_09_P113580 | 5.17574  | 2.52366 | 6.432.E-04 | 0.01950 |
| CG15144  | 26909 | A_09_P022991 | 4.66569  | 1.24310 | 2.114.E-03 | 0.03507 |
| CG15172  | 7144  | A_09_P023331 | 9.66750  | 1.23175 | 3.242.E-04 | 0.01440 |
|          | 9622  | A_09_P162685 | 10.29422 | 1.24415 | 4.009.E-04 | 0.01552 |
| CG15312  | 14203 | A_09_P037271 | 7.08468  | 1.27998 | 9.190.E-04 | 0.02333 |
|          | 19078 | A_09_P037271 | 7.06280  | 1.38899 | 3.221.E-04 | 0.01438 |
|          | 21538 | A_09_P195200 | 5.79425  | 0.89138 | 1.618.E-03 | 0.03094 |
|          | 20020 | A_09_P214965 | 7.15731  | 1.31451 | 5.104.E-04 | 0.01734 |

|         |       |              |          |         |            |         |
|---------|-------|--------------|----------|---------|------------|---------|
| CG15390 | 12051 | A_09_P018536 | 8.28966  | 1.51980 | 1.796.E-04 | 0.01142 |
|         | 21055 | A_09_P018536 | 8.15180  | 1.59605 | 1.192.E-04 | 0.00980 |
| CG15400 | 32621 | A_09_P018716 | 3.51669  | 1.58721 | 6.741.E-04 | 0.01989 |
|         | 16566 | A_09_P216915 | 8.27649  | 0.94987 | 4.018.E-03 | 0.04634 |
| CG15506 | 16580 | A_09_P061021 | 2.61563  | 0.80156 | 2.990.E-03 | 0.04025 |
| CG15572 | 2566  | A_09_P066971 | 2.59007  | 0.96962 | 3.910.E-03 | 0.04569 |
| CG15771 | 44341 | A_09_P067336 | 7.65806  | 1.34059 | 2.259.E-04 | 0.01239 |
|         | 7416  | A_09_P067336 | 7.91294  | 1.37098 | 2.079.E-04 | 0.01192 |
| CG1640  | 32178 | A_09_P038366 | 9.30690  | 0.80168 | 2.825.E-03 | 0.03942 |
|         | 4906  | A_09_P038366 | 9.39363  | 0.86754 | 1.772.E-03 | 0.03209 |
| CG1673  | 27187 | A_09_P038386 | 8.64794  | 0.73661 | 4.682.E-03 | 0.04995 |
|         | 22794 | A_09_P038386 | 8.69915  | 0.76097 | 3.934.E-03 | 0.04582 |
| CG16833 | 28216 | A_09_P050501 | 7.08749  | 1.19826 | 5.935.E-04 | 0.01879 |
|         | 23891 | A_09_P161615 | 3.25370  | 1.46113 | 2.069.E-04 | 0.01192 |
|         | 39017 | A_09_P197290 | 7.84370  | 1.36405 | 1.943.E-04 | 0.01173 |
| CG16838 | 1901  | A_09_P033406 | 7.94629  | 0.73732 | 4.236.E-03 | 0.04742 |
|         | 4888  | A_09_P033406 | 7.96409  | 0.79137 | 2.920.E-03 | 0.03996 |
| CG16898 | 40382 | A_09_P025566 | 2.16321  | 2.39160 | 3.706.E-03 | 0.04460 |
|         | 26228 | A_09_P025566 | 1.88183  | 2.87866 | 1.024.E-04 | 0.00938 |
| CG17029 | 29010 | A_09_P033316 | 4.94824  | 1.02396 | 1.028.E-03 | 0.02455 |
| CG17075 | 28088 | A_09_P118285 | 7.99250  | 0.95769 | 1.709.E-03 | 0.03195 |
| CG1753  | 43202 | A_09_P040971 | 6.69148  | 2.43304 | 5.858.E-06 | 0.00581 |
| CG17571 | 44331 | A_09_P126350 | 1.83533  | 0.83594 | 2.949.E-03 | 0.04013 |
| CG17636 | 9435  | A_09_P077966 | 8.13010  | 0.80174 | 3.751.E-03 | 0.04465 |
|         | 7517  | A_09_P171165 | 7.46929  | 0.82360 | 2.812.E-03 | 0.03934 |
| CG17802 | 7181  | A_09_P068646 | 6.53298  | 0.87903 | 2.533.E-03 | 0.03764 |
| CG17928 | 39996 | A_09_P022831 | 7.14362  | 1.05821 | 1.386.E-03 | 0.02851 |
|         | 9762  | A_09_P112685 | 6.96353  | 1.25084 | 8.677.E-04 | 0.02262 |
| CG18155 | 18781 | A_09_P067891 | 10.15933 | 1.07579 | 4.008.E-03 | 0.04631 |
|         | 12601 | A_09_P137120 | 8.82721  | 1.08436 | 1.641.E-03 | 0.03107 |
| CG18636 | 44992 | A_09_P022716 | 0.77727  | 1.47986 | 5.090.E-04 | 0.01733 |
| CG1958  | 37468 | A_09_P067866 | 8.37277  | 1.18549 | 1.251.E-03 | 0.02712 |
|         | 14676 | A_09_P067866 | 8.75643  | 1.23114 | 2.954.E-03 | 0.04013 |
| CG2111  | 43370 | A_09_P037411 | 3.59408  | 2.51368 | 1.144.E-03 | 0.02602 |
|         | 14692 | A_09_P037411 | 3.23965  | 2.59484 | 9.361.E-04 | 0.02356 |
| CG30022 | 19229 | A_09_P057369 | 5.93213  | 1.05377 | 4.079.E-03 | 0.04661 |
| CG30089 | 3445  | A_09_P050306 | 5.11611  | 1.55347 | 2.279.E-04 | 0.01245 |
| CG30184 | 11484 | A_09_P147580 | 5.13381  | 1.00448 | 2.913.E-03 | 0.03996 |
| CG30273 | 4503  | A_09_P057981 | 6.20755  | 0.81082 | 3.127.E-03 | 0.04112 |
| CG3036  | 34049 | A_09_P019351 | 7.95892  | 2.41206 | 4.397.E-05 | 0.00750 |
|         | 35772 | A_09_P019351 | 7.74602  | 2.48934 | 2.547.E-05 | 0.00683 |
| CG30409 | 31581 | A_09_P058351 | 7.18754  | 0.76087 | 4.039.E-03 | 0.04642 |
| CG30497 | 7567  | A_09_P179170 | 8.24992  | 1.29809 | 1.037.E-03 | 0.02464 |
| CG31086 | 4224  | A_09_P204735 | 6.30585  | 1.12084 | 1.151.E-03 | 0.02606 |
| CG31098 | 3207  | A_09_P058986 | 3.81235  | 1.27262 | 2.038.E-03 | 0.03442 |
| CG31145 | 5102  | A_09_P183695 | 3.17269  | 2.72927 | 3.993.E-05 | 0.00750 |
|         | 44052 | A_09_P225500 | 2.55129  | 1.58768 | 2.713.E-03 | 0.03850 |
| CG31262 | 30835 | A_09_P208875 | 1.72845  | 1.62930 | 7.217.E-04 | 0.02050 |
| CG31313 | 7121  | A_09_P059581 | 5.84213  | 1.33832 | 7.218.E-04 | 0.02050 |
| CG31381 | 30202 | A_09_P056601 | 6.95506  | 0.82645 | 3.486.E-03 | 0.04308 |
| CG31472 | 20911 | A_09_P059946 | 6.76970  | 2.23508 | 3.310.E-05 | 0.00750 |
| CG31473 | 35831 | A_09_P059951 | 6.30880  | 1.21555 | 3.238.E-04 | 0.01440 |
| CG31807 | 33772 | A_09_P013791 | 5.08008  | 1.54850 | 8.245.E-05 | 0.00875 |
|         | 21171 | A_09_P013791 | 5.00657  | 1.55489 | 1.105.E-04 | 0.00952 |
|         | 34073 | A_09_P217110 | 5.99553  | 0.79444 | 3.218.E-03 | 0.04170 |
| CG31861 | 25457 | A_09_P166490 | 3.07771  | 1.01003 | 1.224.E-03 | 0.02685 |
| CG31975 | 23883 | A_09_P014226 | 6.80592  | 1.26384 | 5.990.E-04 | 0.01885 |
|         | 4038  | A_09_P014226 | 6.87436  | 1.26772 | 2.497.E-04 | 0.01279 |
| CG31976 | 1309  | A_09_P014231 | 6.24039  | 0.95471 | 2.627.E-03 | 0.03809 |
|         | 21026 | A_09_P014231 | 6.26702  | 1.09382 | 5.851.E-04 | 0.01865 |
| CG32061 | 24349 | A_09_P014431 | 0.79010  | 2.42081 | 2.817.E-03 | 0.03938 |
| CG32164 | 29899 | A_09_P162230 | 10.59307 | 0.80191 | 4.607.E-03 | 0.04967 |
|         | 25128 | A_09_P191830 | 12.59270 | 0.77169 | 4.206.E-03 | 0.04732 |
| CG32206 | 4864  | A_09_P014911 | 2.98556  | 0.97076 | 2.480.E-03 | 0.03718 |
| CG32318 | 306   | A_09_P015271 | 10.66606 | 1.47523 | 1.939.E-04 | 0.01173 |

|         |       |              |         |         |            |         |
|---------|-------|--------------|---------|---------|------------|---------|
| CG32365 | 7845  | A_09_P015346 | 8.26177 | 1.82836 | 4.138.E-05 | 0.00750 |
|         | 2938  | A_09_P015346 | 8.23954 | 1.88322 | 4.853.E-05 | 0.00755 |
|         | 26855 | A_09_P177415 | 9.32109 | 1.96317 | 9.269.E-05 | 0.00914 |
| CG32369 | 31540 | A_09_P145485 | 2.30302 | 1.51168 | 1.255.E-04 | 0.01008 |
| CG32373 | 44782 | A_09_P015371 | 7.16907 | 1.19178 | 8.626.E-04 | 0.02258 |
|         | 15630 | A_09_P015371 | 6.68180 | 1.22813 | 7.246.E-04 | 0.02054 |
| CG32412 | 28529 | A_09_P015486 | 8.63849 | 0.81835 | 3.158.E-03 | 0.04128 |
|         | 16784 | A_09_P015486 | 8.76103 | 0.89166 | 2.188.E-03 | 0.03570 |
| CG32413 | 24011 | A_09_P015491 | 5.13643 | 0.83915 | 4.446.E-03 | 0.04873 |
| CG3244  | 27692 | A_09_P019281 | 2.39118 | 1.08559 | 7.677.E-04 | 0.02118 |
| CG32442 | 20379 | A_09_P151405 | 7.62737 | 0.81920 | 3.730.E-03 | 0.04464 |
| CG32521 | 13776 | A_09_P015731 | 3.93859 | 1.08703 | 3.484.E-03 | 0.04307 |
|         | 40239 | A_09_P202530 | 6.81512 | 0.93896 | 2.257.E-03 | 0.03604 |
| CG32719 | 2626  | A_09_P016331 | 4.33366 | 2.96455 | 2.852.E-03 | 0.03956 |
| CG32726 | 23358 | A_09_P016341 | 4.07058 | 3.60211 | 2.249.E-04 | 0.01239 |
| CG32727 | 214   | A_09_P016346 | 7.14899 | 1.49045 | 2.409.E-03 | 0.03686 |
|         | 22733 | A_09_P016346 | 7.10558 | 1.67960 | 1.777.E-03 | 0.03209 |
|         | 39481 | A_09_P130230 | 4.94156 | 3.32509 | 3.913.E-04 | 0.01534 |
| CG32987 | 27392 | A_09_P112340 | 1.33046 | 0.94975 | 3.423.E-03 | 0.04283 |
| CG33181 | 44600 | A_09_P017041 | 9.75498 | 1.08929 | 2.964.E-03 | 0.04013 |
|         | 13104 | A_09_P050611 | 7.01212 | 2.25534 | 1.143.E-05 | 0.00591 |
|         | 20347 | A_09_P109675 | 7.99406 | 1.74811 | 9.607.E-05 | 0.00916 |
|         | 21618 | A_09_P185735 | 6.71813 | 1.29700 | 7.064.E-04 | 0.02035 |
|         | 37436 | A_09_P192820 | 9.86864 | 1.07721 | 1.131.E-03 | 0.02581 |
| CG33275 | 3014  | A_09_P053651 | 5.67902 | 1.87725 | 1.875.E-04 | 0.01160 |
|         | 13604 | A_09_P053651 | 5.64482 | 1.88978 | 2.096.E-04 | 0.01192 |
| CG33322 | 15413 | A_09_P017516 | 3.69126 | 1.36970 | 1.791.E-03 | 0.03218 |
|         | 38038 | A_09_P214945 | 5.91322 | 0.74423 | 3.690.E-03 | 0.04458 |
| CG33468 | 26122 | A_09_P017646 | 2.47472 | 0.94099 | 3.411.E-03 | 0.04275 |
| CG33477 | 21974 | A_09_P017676 | 6.98758 | 1.30808 | 1.925.E-03 | 0.03358 |
| CG33552 | 9721  | A_09_P000261 | 7.56293 | 1.05835 | 9.034.E-04 | 0.02311 |
|         | 6375  | A_09_P000261 | 7.46152 | 1.22096 | 6.502.E-04 | 0.01965 |
| CG33558 | 1667  | A_09_P000311 | 8.76683 | 0.84538 | 2.029.E-03 | 0.03438 |
|         | 7158  | A_09_P000316 | 8.03402 | 0.95220 | 1.087.E-03 | 0.02536 |
|         | 30557 | A_09_P000316 | 7.99991 | 1.01349 | 7.366.E-04 | 0.02078 |
| CG3362  | 41816 | A_09_P027401 | 6.89906 | 1.15315 | 1.774.E-03 | 0.03209 |
|         | 5434  | A_09_P027401 | 7.20566 | 1.31519 | 4.375.E-04 | 0.01620 |
| CG33665 | 357   | A_09_P000423 | 4.85393 | 1.21511 | 4.365.E-04 | 0.01619 |
| CG3371  | 29906 | A_09_P028056 | 8.52407 | 1.30820 | 2.246.E-04 | 0.01239 |
|         | 39863 | A_09_P028056 | 8.39265 | 1.34815 | 2.437.E-04 | 0.01262 |
| CG34040 | 39701 | A_09_P001136 | 2.76334 | 0.72243 | 4.595.E-03 | 0.04962 |
| CG34167 | 12140 | A_09_P003016 | 2.21323 | 0.75922 | 4.188.E-03 | 0.04718 |
| CG34295 | 33764 | A_09_P003646 | 1.75449 | 0.77873 | 4.385.E-03 | 0.04843 |
| CG34337 | 22255 | A_09_P003816 | 5.52830 | 2.05117 | 6.877.E-04 | 0.02009 |
|         | 34926 | A_09_P003816 | 5.32189 | 2.16517 | 4.780.E-04 | 0.01682 |
|         | 45009 | A_09_P101645 | 2.11117 | 3.61760 | 2.931.E-04 | 0.01365 |
| CG34353 | 38372 | A_09_P003906 | 7.58750 | 3.23022 | 8.792.E-06 | 0.00581 |
|         | 13762 | A_09_P003906 | 7.76202 | 3.23044 | 2.392.E-05 | 0.00683 |
|         | 8163  | A_09_P205315 | 5.76986 | 3.77815 | 2.130.E-05 | 0.00643 |
|         | 9772  | A_09_P218190 | 7.29268 | 2.46910 | 4.792.E-04 | 0.01684 |
| CG34360 | 12547 | A_09_P063151 | 9.69441 | 1.18534 | 4.935.E-04 | 0.01698 |
|         | 26978 | A_09_P063151 | 9.39905 | 1.35325 | 5.241.E-04 | 0.01760 |
| CG34386 | 22257 | A_09_P216450 | 3.83800 | 0.89036 | 4.203.E-03 | 0.04731 |
| CG3509  | 31479 | A_09_P075131 | 5.93287 | 2.67381 | 5.775.E-06 | 0.00581 |
|         | 28135 | A_09_P075131 | 5.83785 | 2.71985 | 5.286.E-06 | 0.00581 |
| CG3581  | 29392 | A_09_P069171 | 5.61401 | 1.14805 | 1.363.E-03 | 0.02826 |
|         | 22605 | A_09_P069171 | 5.69494 | 1.16428 | 8.738.E-04 | 0.02267 |
| CG3608  | 28936 | A_09_P027621 | 8.18249 | 1.05520 | 1.404.E-03 | 0.02859 |
|         | 23658 | A_09_P027621 | 8.16403 | 1.09530 | 1.012.E-03 | 0.02447 |
| CG3609  | 35091 | A_09_P018531 | 8.56901 | 0.84144 | 2.629.E-03 | 0.03809 |
|         | 25888 | A_09_P130625 | 8.31456 | 1.38483 | 2.962.E-04 | 0.01375 |
| CG3838  | 14666 | A_09_P021156 | 6.44070 | 1.46864 | 1.443.E-04 | 0.01046 |
|         | 43801 | A_09_P021156 | 6.03751 | 1.47957 | 3.574.E-04 | 0.01468 |
|         | 15304 | A_09_P104790 | 6.37749 | 1.52579 | 4.844.E-04 | 0.01690 |
| CG40006 | 7415  | A_09_P001241 | 7.85098 | 0.91788 | 3.876.E-03 | 0.04536 |

|         |       |              |          |         |            |         |
|---------|-------|--------------|----------|---------|------------|---------|
|         | 18487 | A_09_P001241 | 7.85921  | 1.04792 | 1.903.E-03 | 0.03334 |
| CG40485 | 22502 | A_09_P002426 | 3.24346  | 1.18411 | 4.656.E-03 | 0.04989 |
|         | 44065 | A_09_P002426 | 2.79130  | 1.83260 | 9.333.E-05 | 0.00916 |
| CG41562 | 44672 | A_09_P005536 | 5.31538  | 1.04325 | 2.217.E-03 | 0.03592 |
| CG42233 | 23580 | A_09_P140620 | 10.64461 | 0.85627 | 2.354.E-03 | 0.03643 |
| CG42265 | 22121 | A_09_P067276 | 6.01423  | 2.29298 | 2.025.E-05 | 0.00643 |
|         | 43215 | A_09_P193465 | 3.92130  | 2.40822 | 1.746.E-05 | 0.00614 |
| CG42340 | 2364  | A_09_P067626 | 8.31704  | 0.83503 | 3.091.E-03 | 0.04092 |
|         | 34853 | A_09_P067626 | 8.17457  | 0.86675 | 2.113.E-03 | 0.03507 |
|         | 39219 | A_09_P067626 | 8.12922  | 0.86921 | 2.115.E-03 | 0.03507 |
|         | 7761  | A_09_P067626 | 8.14105  | 0.87031 | 1.976.E-03 | 0.03390 |
|         | 37777 | A_09_P067626 | 8.12014  | 0.87081 | 1.883.E-03 | 0.03320 |
|         | 11612 | A_09_P067626 | 8.33283  | 0.87445 | 1.569.E-03 | 0.03039 |
|         | 34396 | A_09_P067626 | 8.14131  | 0.89003 | 1.930.E-03 | 0.03358 |
|         | 1333  | A_09_P067626 | 8.25744  | 0.90404 | 1.412.E-03 | 0.02866 |
|         | 10010 | A_09_P067626 | 8.28128  | 0.91096 | 1.303.E-03 | 0.02759 |
|         | 19303 | A_09_P067626 | 8.12001  | 0.96995 | 1.265.E-03 | 0.02722 |
|         | 25659 | A_09_P179810 | 8.65191  | 0.88111 | 2.992.E-03 | 0.04025 |
| CG42368 | 2609  | A_09_P019951 | 5.04336  | 1.11398 | 9.715.E-04 | 0.02399 |
|         | 8064  | A_09_P112565 | 5.69624  | 1.07798 | 6.627.E-04 | 0.01968 |
| CG42404 | 33659 | A_09_P075361 | 6.69741  | 1.71340 | 5.708.E-05 | 0.00793 |
|         | 2884  | A_09_P075361 | 6.84973  | 1.73338 | 6.860.E-05 | 0.00827 |
|         | 19986 | A_09_P118075 | 5.02353  | 1.09679 | 1.787.E-03 | 0.03217 |
| CG42492 | 1134  | A_09_P171335 | 5.39659  | 1.55316 | 1.013.E-04 | 0.00935 |
|         | 19136 | A_09_P191475 | 6.45403  | 1.56964 | 1.897.E-03 | 0.03334 |
|         | 13640 | A_09_P192990 | 6.27211  | 2.30797 | 1.166.E-04 | 0.00968 |
|         | 39723 | A_09_P216680 | 9.26801  | 1.22464 | 1.108.E-03 | 0.02556 |
| CG4250  | 17026 | A_09_P026601 | 4.14393  | 1.24001 | 6.531.E-04 | 0.01965 |
|         | 26369 | A_09_P026601 | 3.93392  | 1.26823 | 5.861.E-04 | 0.01866 |
| CG42514 | 10961 | A_09_P014731 | 5.67958  | 1.75996 | 6.864.E-04 | 0.02009 |
| CG42556 | 41147 | A_09_P049031 | 5.35015  | 0.70392 | 4.621.E-03 | 0.04971 |
| CG42669 | 39537 | A_09_P162330 | 6.20550  | 1.42993 | 3.531.E-04 | 0.01463 |
| CG42732 | 8143  | A_09_P163660 | 7.86806  | 0.84861 | 3.036.E-03 | 0.04061 |
| CG4306  | 34057 | A_09_P034261 | 6.36198  | 1.54860 | 5.798.E-04 | 0.01853 |
|         | 10242 | A_09_P034261 | 6.69090  | 1.62714 | 4.658.E-04 | 0.01668 |
| CG4364  | 23490 | A_09_P021181 | 11.29735 | 0.80300 | 3.173.E-03 | 0.04144 |
| CG4389  | 35621 | A_09_P065151 | 9.24617  | 0.85633 | 1.795.E-03 | 0.03222 |
|         | 1152  | A_09_P065151 | 9.20747  | 0.89238 | 1.753.E-03 | 0.03205 |
| CG4570  | 3549  | A_09_P073626 | 10.90859 | 0.85947 | 2.344.E-03 | 0.03643 |
|         | 11061 | A_09_P073626 | 10.77019 | 0.92326 | 2.016.E-03 | 0.03429 |
| CG4771  | 17900 | A_09_P070396 | 9.52263  | 1.07370 | 2.222.E-03 | 0.03595 |
| CG4815  | 37475 | A_09_P111860 | 1.98509  | 1.26347 | 3.185.E-03 | 0.04150 |
| CG5018  | 27695 | A_09_P033426 | 8.92238  | 0.81132 | 2.505.E-03 | 0.03742 |
|         | 25431 | A_09_P033426 | 8.97812  | 0.81450 | 2.234.E-03 | 0.03601 |
| CG5130  | 19633 | A_09_P035136 | 9.84559  | 0.97004 | 3.214.E-03 | 0.04167 |
|         | 34485 | A_09_P035136 | 9.68370  | 1.08614 | 1.803.E-03 | 0.03231 |
| CG5428  | 36797 | A_09_P027036 | 4.04488  | 0.98453 | 1.109.E-03 | 0.02556 |
|         | 18283 | A_09_P027036 | 4.01809  | 1.14978 | 7.827.E-04 | 0.02141 |
| CG5535  | 32674 | A_09_P034156 | 10.13939 | 0.84850 | 3.131.E-03 | 0.04112 |
|         | 27855 | A_09_P034156 | 10.06442 | 0.89068 | 2.960.E-03 | 0.04013 |
| CG5612  | 38185 | A_09_P072386 | 5.03740  | 1.13876 | 1.870.E-03 | 0.03306 |
| CG5718  | 26219 | A_09_P055171 | 1.93003  | 2.29581 | 6.916.E-04 | 0.02015 |
| CG5756  | 29277 | A_09_P008986 | 3.14939  | 0.81339 | 3.382.E-03 | 0.04260 |
| CG5883  | 6356  | A_09_P055186 | 1.59916  | 1.27567 | 3.529.E-03 | 0.04342 |
| CG5937  | 41737 | A_09_P067491 | 6.34864  | 1.52991 | 9.508.E-05 | 0.00916 |
|         | 22919 | A_09_P067491 | 6.26863  | 1.70562 | 1.490.E-04 | 0.01050 |
| CG5976  | 11200 | A_09_P109975 | 6.72176  | 0.95993 | 2.056.E-03 | 0.03460 |
| CG6073  | 9858  | A_09_P124545 | 5.33844  | 1.06852 | 7.094.E-04 | 0.02035 |
| CG6084  | 42697 | A_09_P048596 | 11.17754 | 1.00825 | 1.490.E-03 | 0.02964 |
|         | 29180 | A_09_P048596 | 11.21196 | 1.05292 | 8.388.E-04 | 0.02220 |
| CG6195  | 10030 | A_09_P069266 | 9.69216  | 1.36477 | 3.777.E-04 | 0.01507 |
|         | 18986 | A_09_P191375 | 10.60284 | 1.06179 | 1.725.E-03 | 0.03199 |
| CG6209  | 895   | A_09_P007371 | 1.88809  | 0.95084 | 1.212.E-03 | 0.02673 |
| CG6254  | 19149 | A_09_P073401 | 6.83176  | 0.82702 | 2.831.E-03 | 0.03947 |
| CG6435  | 16293 | A_09_P008506 | 3.69610  | 0.86244 | 2.095.E-03 | 0.03496 |



|        |       |              |          |         |            |         |
|--------|-------|--------------|----------|---------|------------|---------|
| CG6763 | 24089 | A_09_P070606 | 8.29565  | 0.92945 | 1.988.E-03 | 0.03403 |
| CG6770 | 26719 | A_09_P022166 | 11.37559 | 1.02359 | 1.189.E-03 | 0.02654 |
|        | 19985 | A_09_P196000 | 11.65338 | 1.13696 | 4.688.E-04 | 0.01671 |
| CG6951 | 22068 | A_09_P034981 | 5.48622  | 1.18169 | 1.946.E-03 | 0.03365 |
|        | 36070 | A_09_P034981 | 5.47931  | 1.20038 | 3.939.E-03 | 0.04582 |
| CG7252 | 22004 | A_09_P055191 | 3.11545  | 0.97615 | 1.281.E-03 | 0.02737 |
| CG7294 | 39681 | A_09_P021721 | 5.69207  | 1.06536 | 7.098.E-04 | 0.02035 |
|        | 8618  | A_09_P021721 | 5.88278  | 1.09011 | 1.128.E-03 | 0.02576 |
| CG7330 | 10567 | A_09_P034226 | 5.51492  | 0.90149 | 4.622.E-03 | 0.04971 |
|        | 6200  | A_09_P034226 | 5.53510  | 0.93637 | 2.236.E-03 | 0.03601 |
| CG7409 | 34742 | A_09_P053696 | 3.65354  | 1.28698 | 5.771.E-04 | 0.01852 |
|        | 8874  | A_09_P053696 | 3.84252  | 1.30688 | 8.348.E-04 | 0.02216 |
|        | 33847 | A_09_P053696 | 3.58323  | 1.35336 | 1.979.E-04 | 0.01176 |
|        | 18121 | A_09_P053696 | 3.62163  | 1.36359 | 2.083.E-04 | 0.01192 |
|        | 17280 | A_09_P053696 | 3.80792  | 1.38314 | 2.864.E-04 | 0.01352 |
|        | 32031 | A_09_P053696 | 3.45859  | 1.39734 | 3.037.E-04 | 0.01394 |
|        | 11593 | A_09_P053696 | 3.81352  | 1.43187 | 1.613.E-04 | 0.01079 |
|        | 14564 | A_09_P053696 | 3.75682  | 1.49709 | 9.774.E-05 | 0.00922 |
|        | 14081 | A_09_P053696 | 3.71468  | 1.54639 | 1.476.E-04 | 0.01048 |
|        | 32652 | A_09_P053696 | 3.54673  | 1.66947 | 1.729.E-04 | 0.01129 |
|        | 30019 | A_09_P174425 | 7.32005  | 1.66930 | 1.689.E-03 | 0.03166 |
| CG7422 | 16000 | A_09_P053686 | 3.14524  | 2.22285 | 5.545.E-04 | 0.01816 |
| CG7526 | 10497 | A_09_P053636 | 2.56765  | 2.00981 | 1.548.E-03 | 0.03030 |
|        | 15834 | A_09_P053636 | 2.69925  | 2.31168 | 2.705.E-03 | 0.03842 |
| CG7573 | 803   | A_09_P054901 | 2.20115  | 3.59163 | 9.351.E-04 | 0.02356 |
| CG7716 | 6267  | A_09_P053646 | 3.83741  | 2.44645 | 3.005.E-05 | 0.00710 |
|        | 34089 | A_09_P053646 | 3.56378  | 2.67237 | 9.995.E-06 | 0.00581 |
|        | 484   | A_09_P129115 | 3.41527  | 2.56184 | 6.286.E-04 | 0.01922 |
| CG7728 | 23159 | A_09_P033861 | 8.73347  | 0.83831 | 2.899.E-03 | 0.03994 |
| CG7896 | 40087 | A_09_P061171 | 4.06150  | 0.87260 | 4.700.E-03 | 0.04995 |
| CG7993 | 32768 | A_09_P068766 | 10.74477 | 0.77801 | 3.378.E-03 | 0.04260 |
| CG8147 | 18433 | A_09_P056576 | 4.22239  | 0.89781 | 1.967.E-03 | 0.03389 |
| CG8173 | 3724  | A_09_P039886 | 9.96108  | 0.94165 | 1.078.E-03 | 0.02524 |
| CG8180 | 9871  | A_09_P007991 | 3.05953  | 1.56071 | 1.279.E-04 | 0.01012 |
|        | 2653  | A_09_P007991 | 3.16817  | 1.67861 | 3.304.E-04 | 0.01449 |
| CG8306 | 38720 | A_09_P008431 | 5.66413  | 1.50309 | 2.408.E-04 | 0.01261 |
|        | 26565 | A_09_P008431 | 5.71769  | 1.71991 | 1.901.E-04 | 0.01167 |
| CG8316 | 14552 | A_09_P039851 | 9.24679  | 0.73469 | 4.160.E-03 | 0.04702 |
| CG8850 | 1581  | A_09_P006766 | 2.54078  | 1.78257 | 9.675.E-04 | 0.02396 |
|        | 7919  | A_09_P006766 | 2.38230  | 2.34149 | 1.793.E-04 | 0.01142 |
| CG8939 | 13255 | A_09_P039301 | 10.24363 | 0.73142 | 3.830.E-03 | 0.04504 |
| CG9004 | 43659 | A_09_P028731 | 5.45061  | 1.18516 | 2.371.E-03 | 0.03656 |
|        | 14338 | A_09_P028731 | 5.86884  | 1.22518 | 1.406.E-03 | 0.02860 |
| CG9013 | 9482  | A_09_P101940 | 4.99921  | 1.14389 | 1.962.E-03 | 0.03387 |
| CG9101 | 3504  | A_09_P130125 | 2.00931  | 1.01843 | 9.398.E-04 | 0.02356 |
| CG9168 | 10397 | A_09_P201315 | 7.48937  | 0.80429 | 3.308.E-03 | 0.04224 |
| CG9238 | 15228 | A_09_P055951 | 5.81004  | 1.77052 | 1.225.E-04 | 0.00998 |
|        | 17723 | A_09_P055951 | 5.79950  | 1.84439 | 2.143.E-04 | 0.01209 |
| CG9281 | 14712 | A_09_P039111 | 11.74294 | 1.28406 | 4.963.E-04 | 0.01705 |
|        | 31085 | A_09_P148290 | 10.36613 | 0.88824 | 1.779.E-03 | 0.03209 |
| CG9328 | 10530 | A_09_P023841 | 7.76717  | 1.62378 | 7.367.E-05 | 0.00848 |
|        | 22809 | A_09_P023841 | 7.52252  | 1.81618 | 4.358.E-05 | 0.00750 |
|        | 44134 | A_09_P153885 | 7.64117  | 1.59749 | 6.401.E-05 | 0.00827 |
| CG9503 | 40194 | A_09_P038801 | 6.88171  | 1.61731 | 6.048.E-05 | 0.00822 |
|        | 42117 | A_09_P038801 | 6.86887  | 1.64743 | 7.266.E-05 | 0.00848 |
| CG9650 | 26461 | A_09_P067861 | 3.46074  | 2.62062 | 7.023.E-06 | 0.00581 |
|        | 15241 | A_09_P067861 | 3.72961  | 2.66550 | 7.324.E-06 | 0.00581 |
|        | 33437 | A_09_P188310 | 7.71357  | 1.39417 | 2.176.E-04 | 0.01220 |
|        | 13897 | A_09_P205000 | 4.70538  | 1.74788 | 3.086.E-04 | 0.01406 |
| CG9657 | 19109 | A_09_P067916 | 4.85831  | 2.90480 | 4.245.E-04 | 0.01594 |
|        | 18531 | A_09_P067916 | 4.45716  | 3.09079 | 5.122.E-04 | 0.01737 |
| CG9684 | 35444 | A_09_P072576 | 8.57852  | 0.78252 | 3.078.E-03 | 0.04087 |
|        | 19599 | A_09_P072576 | 8.73119  | 0.84775 | 1.833.E-03 | 0.03271 |
|        | 12604 | A_09_P221590 | 10.63833 | 1.17113 | 1.157.E-03 | 0.02612 |
| CG9692 | 29209 | A_09_P033721 | 7.47459  | 0.78943 | 2.692.E-03 | 0.03830 |

|                  |       |              |          |         |            |         |
|------------------|-------|--------------|----------|---------|------------|---------|
|                  | 15156 | A_09_P033721 | 7.55560  | 0.86334 | 1.993.E-03 | 0.03404 |
| CG9796           | 1858  | A_09_P074751 | 9.29661  | 1.66556 | 5.201.E-05 | 0.00775 |
| CheA7a           | 27262 | A_09_P143670 | 3.54357  | 1.75892 | 1.647.E-03 | 0.03111 |
| CheB42a          | 13705 | A_09_P017581 | 8.19961  | 0.96595 | 1.807.E-03 | 0.03234 |
| Cht8             | 6303  | A_09_P025951 | 4.32495  | 1.08849 | 1.258.E-03 | 0.02712 |
| Con              | 31884 | A_09_P194775 | 5.24349  | 1.07672 | 4.389.E-03 | 0.04845 |
| cp309            | 15310 | A_09_P209515 | 3.76672  | 0.81936 | 2.338.E-03 | 0.03643 |
| Cp7Fc            | 26772 | A_09_P030346 | 8.61803  | 1.19031 | 3.385.E-04 | 0.01453 |
|                  | 28703 | A_09_P030346 | 8.62639  | 1.23812 | 2.759.E-04 | 0.01333 |
| Cpr47Eb          | 31549 | A_09_P006361 | 0.97026  | 1.35503 | 1.873.E-03 | 0.03307 |
| Cpr78Cc          | 1038  | A_09_P035406 | 2.33423  | 1.68240 | 2.224.E-04 | 0.01233 |
| CR43279          | 32858 | A_09_P225025 | 4.53777  | 3.48858 | 1.629.E-03 | 0.03104 |
| ct               | 22177 | A_09_P090115 | 5.91195  | 2.41544 | 1.400.E-03 | 0.02857 |
| cup <sup>+</sup> | 33200 | A_09_P197885 | 10.61154 | 1.04196 | 1.203.E-03 | 0.02660 |
| cv-c             | 17168 | A_09_P004116 | 4.53898  | 1.36900 | 1.897.E-03 | 0.03334 |
| CycJ             | 12139 | A_09_P012226 | 8.10951  | 0.85435 | 3.359.E-03 | 0.04249 |
|                  | 38547 | A_09_P012226 | 7.77383  | 0.90965 | 2.630.E-03 | 0.03809 |
| Cyp4d8           | 12744 | A_09_P030516 | 2.55666  | 1.78970 | 3.133.E-03 | 0.04112 |
| Cyp4e3           | 28129 | A_09_P052171 | 3.48278  | 1.38992 | 2.097.E-03 | 0.03496 |
| Cyp4g1           | 18691 | A_09_P011876 | 7.06546  | 0.86449 | 3.844.E-03 | 0.04513 |
|                  | 38020 | A_09_P052161 | 9.39502  | 0.99451 | 2.704.E-03 | 0.03842 |
| Cyp4g15          | 32301 | A_09_P037731 | 2.44186  | 1.21507 | 2.462.E-03 | 0.03700 |
| Cyp6a20          | 41546 | A_09_P007841 | 4.81855  | 1.38399 | 2.726.E-04 | 0.01328 |
|                  | 3199  | A_09_P007841 | 5.04666  | 1.43675 | 1.899.E-04 | 0.01167 |
|                  | 25399 | A_09_P132155 | 4.87815  | 1.78291 | 1.034.E-04 | 0.00938 |
| Cyp6v1           | 41227 | A_09_P204725 | 7.16094  | 0.86825 | 2.591.E-03 | 0.03797 |
| dl               | 2019  | A_09_P041991 | 7.12534  | 1.54431 | 1.196.E-03 | 0.02657 |
|                  | 45180 | A_09_P041991 | 6.71387  | 1.65219 | 8.478.E-04 | 0.02234 |
|                  | 2378  | A_09_P119495 | 7.18162  | 1.44138 | 9.427.E-04 | 0.02361 |
|                  | 9978  | A_09_P181510 | 8.17108  | 1.00686 | 8.685.E-04 | 0.02262 |
| Dms              | 24938 | A_09_P013221 | 3.04683  | 1.06986 | 6.591.E-04 | 0.01967 |
| DNApol-alpha50   | 39528 | A_09_P029361 | 7.08566  | 1.06948 | 1.558.E-03 | 0.03039 |
| DNApol-alpha73   | 9531  | A_09_P011801 | 8.12992  | 0.76826 | 4.396.E-03 | 0.04849 |
| dpa              | 27708 | A_09_P031391 | 10.90661 | 0.86320 | 2.821.E-03 | 0.03939 |
|                  | 22479 | A_09_P031391 | 10.99776 | 0.95863 | 1.900.E-03 | 0.03334 |
| dpp              | 37919 | A_09_P042056 | 3.45354  | 1.04909 | 4.361.E-03 | 0.04825 |
| dpr6             | 1635  | A_09_P190075 | 8.10727  | 0.98308 | 2.605.E-03 | 0.03799 |
| dpr8             | 19993 | A_09_P049351 | 8.08439  | 1.57986 | 8.567.E-05 | 0.00882 |
| egr              | 32455 | A_09_P005981 | 9.18526  | 0.80665 | 3.411.E-03 | 0.04275 |
|                  | 10347 | A_09_P135340 | 4.66703  | 1.17491 | 4.452.E-04 | 0.01633 |
| eIF4E-5          | 44038 | A_09_P053701 | 6.23137  | 0.91984 | 2.970.E-03 | 0.04018 |
| Eip55E           | 40113 | A_09_P042201 | 9.54103  | 1.12655 | 1.214.E-03 | 0.02673 |
|                  | 8619  | A_09_P042201 | 9.70458  | 1.13020 | 9.472.E-04 | 0.02364 |
| esg              | 40208 | A_09_P043141 | 7.13682  | 0.94591 | 2.186.E-03 | 0.03570 |
| etaTry           | 6551  | A_09_P111005 | 1.36159  | 1.34593 | 1.006.E-03 | 0.02439 |
| Ets98B           | 32859 | A_09_P011736 | 7.03804  | 0.96383 | 4.284.E-03 | 0.04770 |
|                  | 34262 | A_09_P011736 | 7.03644  | 1.00820 | 2.292.E-03 | 0.03628 |
|                  | 15204 | A_09_P174640 | 3.31708  | 3.12430 | 1.433.E-06 | 0.00581 |
|                  | 32772 | A_09_P226175 | 5.33719  | 1.52041 | 2.350.E-04 | 0.01256 |
| fal <sup>+</sup> | 14063 | A_09_P064906 | 11.79443 | 0.78284 | 4.664.E-03 | 0.04990 |
| fas              | 43043 | A_09_P225680 | 6.50711  | 1.12128 | 4.608.E-03 | 0.04967 |
| Fas2             | 30038 | A_09_P042336 | 7.30270  | 1.54539 | 1.232.E-04 | 0.00999 |
|                  | 22293 | A_09_P042336 | 7.18386  | 1.71477 | 4.869.E-05 | 0.00755 |
|                  | 23101 | A_09_P042341 | 11.29321 | 1.77562 | 3.837.E-05 | 0.00750 |
|                  | 24759 | A_09_P042341 | 11.33567 | 1.89741 | 2.979.E-05 | 0.00710 |
|                  | 25786 | A_09_P117980 | 8.16105  | 1.59422 | 5.609.E-04 | 0.01828 |
| fog              | 39330 | A_09_P042406 | 6.66846  | 1.60927 | 7.042.E-05 | 0.00842 |
|                  | 15008 | A_09_P042406 | 7.22117  | 1.62407 | 5.686.E-05 | 0.00793 |
|                  | 40297 | A_09_P106105 | 7.06437  | 1.37451 | 3.316.E-04 | 0.01452 |
|                  | 36137 | A_09_P177795 | 5.17419  | 1.51219 | 1.424.E-04 | 0.01044 |
| fs(1)M3          | 3686  | A_09_P011436 | 1.63511  | 4.07929 | 3.779.E-06 | 0.00581 |
|                  | 26649 | A_09_P011436 | 1.21733  | 4.15980 | 4.039.E-06 | 0.00581 |
| Fsh              | 28808 | A_09_P031551 | 3.05591  | 1.90866 | 3.063.E-05 | 0.00710 |
|                  | 24107 | A_09_P031551 | 2.97902  | 2.00131 | 4.206.E-05 | 0.00750 |
| gammaTub37C      | 39685 | A_09_P011941 | 5.82724  | 1.84772 | 1.137.E-04 | 0.00957 |

|             |       |              |          |         |            |         |
|-------------|-------|--------------|----------|---------|------------|---------|
| glob2       | 18069 | A_09_P036856 | 3.22373  | 0.86353 | 2.337.E-03 | 0.03643 |
| gnu         | 27797 | A_09_P042566 | 6.53680  | 1.61822 | 6.675.E-04 | 0.01980 |
|             | 45158 | A_09_P042566 | 6.40120  | 1.63158 | 7.472.E-04 | 0.02096 |
| Gsl         | 34273 | A_09_P042626 | 8.90526  | 2.46133 | 1.965.E-05 | 0.00643 |
|             | 37936 | A_09_P042626 | 8.92905  | 2.47230 | 1.515.E-05 | 0.00614 |
| GstE1       | 12640 | A_09_P009096 | 7.22229  | 0.78934 | 4.011.E-03 | 0.04631 |
|             | 459   | A_09_P009096 | 7.20189  | 0.81632 | 2.291.E-03 | 0.03628 |
|             | 8615  | A_09_P167250 | 8.28091  | 2.62894 | 1.035.E-04 | 0.00938 |
| Gycalpha99B | 23342 | A_09_P029986 | 3.94207  | 1.10458 | 4.301.E-03 | 0.04778 |
|             | 20483 | A_09_P029986 | 4.04801  | 1.12247 | 4.607.E-04 | 0.01664 |
| hkb         | 11882 | A_09_P042726 | 2.99449  | 0.87866 | 3.736.E-03 | 0.04464 |
| Hml         | 33671 | A_09_P066536 | 1.74447  | 0.77091 | 4.027.E-03 | 0.04640 |
| Hn          | 3333  | A_09_P042741 | 6.92389  | 1.52988 | 1.111.E-03 | 0.02556 |
|             | 20491 | A_09_P042741 | 6.78143  | 1.70367 | 7.842.E-04 | 0.02141 |
|             | 34875 | A_09_P046041 | 5.63440  | 1.74542 | 3.909.E-05 | 0.00750 |
|             | 38996 | A_09_P177255 | 5.84544  | 2.76116 | 6.619.E-05 | 0.00827 |
| hoip        | 30094 | A_09_P030816 | 11.28970 | 0.78310 | 4.544.E-03 | 0.04929 |
| Ih          | 13434 | A_09_P065071 | 6.88427  | 1.61059 | 1.476.E-03 | 0.02949 |
|             | 17774 | A_09_P065071 | 6.86457  | 1.66408 | 1.615.E-03 | 0.03094 |
| Ir48b       | 42720 | A_09_P006526 | 4.87566  | 0.96386 | 3.448.E-03 | 0.04295 |
|             | 37246 | A_09_P006526 | 4.72733  | 1.12767 | 2.237.E-03 | 0.03601 |
| Jheh3       | 17376 | A_09_P009331 | 6.24551  | 1.16701 | 4.402.E-04 | 0.01626 |
|             | 18187 | A_09_P009331 | 6.53641  | 1.18173 | 4.513.E-04 | 0.01640 |
| kkv         | 38044 | A_09_P042961 | 8.34837  | 1.72738 | 6.544.E-05 | 0.00827 |
|             | 6851  | A_09_P042961 | 8.56210  | 1.90095 | 7.461.E-05 | 0.00848 |
| I(1)G0193   | 34116 | A_09_P079171 | 9.85179  | 0.74431 | 3.939.E-03 | 0.04582 |
| I(1)G0196   | 38469 | A_09_P079166 | 9.84940  | 0.92093 | 1.203.E-03 | 0.02660 |
|             | 29336 | A_09_P079166 | 9.89377  | 0.96705 | 9.670.E-04 | 0.02396 |
|             | 34522 | A_09_P180275 | 5.66442  | 0.95616 | 1.662.E-03 | 0.03126 |
|             | 39621 | A_09_P225480 | 6.96327  | 0.99037 | 1.551.E-03 | 0.03032 |
| I(2)35Df    | 16061 | A_09_P043151 | 8.64008  | 0.81269 | 2.614.E-03 | 0.03802 |
|             | 24851 | A_09_P043151 | 8.52923  | 0.91632 | 3.599.E-03 | 0.04391 |
| I(2)k09022  | 13567 | A_09_P048786 | 10.44788 | 0.90829 | 1.738.E-03 | 0.03202 |
|             | 44687 | A_09_P048786 | 9.95441  | 0.94029 | 3.109.E-03 | 0.04102 |
| I(2)tid     | 21765 | A_09_P043231 | 8.91836  | 0.75394 | 4.073.E-03 | 0.04661 |
| La          | 29968 | A_09_P013281 | 12.30058 | 0.72385 | 4.303.E-03 | 0.04778 |
| lap         | 12006 | A_09_P176935 | 4.97584  | 0.90914 | 1.286.E-03 | 0.02744 |
| Lasp        | 35348 | A_09_P001951 | 10.40798 | 0.87398 | 2.265.E-03 | 0.03604 |
|             | 15322 | A_09_P001951 | 10.68985 | 0.95239 | 1.444.E-03 | 0.02913 |
|             | 4661  | A_09_P137855 | 10.28689 | 0.90724 | 2.949.E-03 | 0.04013 |
| lectin-33A  | 43505 | A_09_P062351 | 5.60918  | 1.14221 | 1.205.E-03 | 0.02661 |
|             | 7649  | A_09_P062351 | 5.90727  | 1.23443 | 7.433.E-04 | 0.02087 |
| ltd         | 14988 | A_09_P043386 | 9.37065  | 1.29614 | 3.430.E-04 | 0.01453 |
| Mat89Ba     | 22679 | A_09_P075736 | 9.55659  | 0.79692 | 3.519.E-03 | 0.04335 |
| Mcm5        | 20839 | A_09_P031881 | 11.58439 | 0.74247 | 4.075.E-03 | 0.04661 |
| Mcm7        | 4488  | A_09_P032536 | 10.84710 | 1.01016 | 1.771.E-03 | 0.03209 |
|             | 7913  | A_09_P032536 | 10.65361 | 1.03920 | 9.205.E-04 | 0.02333 |
|             | 24051 | A_09_P169240 | 7.92897  | 0.83428 | 2.446.E-03 | 0.03690 |
| met1        | 1968  | A_09_P196905 | 11.13459 | 0.95860 | 1.396.E-03 | 0.02854 |
| mol         | 6084  | A_09_P178065 | 5.59518  | 1.17310 | 2.598.E-03 | 0.03797 |
| mspo        | 6774  | A_09_P032146 | 4.19156  | 1.70335 | 3.248.E-04 | 0.01440 |
| mtg         | 22590 | A_09_P072466 | 8.31339  | 1.24046 | 3.867.E-04 | 0.01526 |
|             | 7546  | A_09_P072466 | 8.50341  | 1.32153 | 2.064.E-04 | 0.01192 |
| mthl10      | 32707 | A_09_P219000 | 5.20174  | 0.81198 | 3.055.E-03 | 0.04073 |
| Muc68Ca     | 6380  | A_09_P194615 | 11.43714 | 0.98803 | 1.856.E-03 | 0.03297 |
| Mys45A      | 3322  | A_09_P005591 | 10.21926 | 0.92881 | 2.446.E-03 | 0.03690 |
|             | 9360  | A_09_P005591 | 10.41506 | 0.93939 | 3.443.E-03 | 0.04295 |
| NAAT1       | 12492 | A_09_P067216 | 3.35057  | 0.85404 | 3.456.E-03 | 0.04299 |
| NaCP60E     | 36318 | A_09_P204800 | 8.44478  | 0.78214 | 3.094.E-03 | 0.04092 |
| nct         | 15878 | A_09_P107320 | 0.76766  | 3.29393 | 1.596.E-05 | 0.00614 |
| neurologin  | 24507 | A_09_P105940 | 5.70217  | 1.11530 | 1.127.E-03 | 0.02576 |
| Nha1        | 7436  | A_09_P020161 | 6.95470  | 1.06593 | 9.451.E-04 | 0.02364 |
| Nhe3        | 42615 | A_09_P065681 | 6.72605  | 1.08441 | 2.268.E-03 | 0.03604 |
|             | 29367 | A_09_P065681 | 6.78293  | 1.16611 | 8.391.E-04 | 0.02220 |
|             | 28789 | A_09_P065686 | 10.33816 | 0.95471 | 2.320.E-03 | 0.03637 |

|                   |       |              |          |         |            |         |
|-------------------|-------|--------------|----------|---------|------------|---------|
|                   | 34865 | A_09_P065686 | 10.34799 | 0.95575 | 2.261.E-03 | 0.03604 |
|                   | 43568 | A_09_P187125 | 9.79477  | 0.78064 | 3.774.E-03 | 0.04475 |
| nht               | 28189 | A_09_P064001 | 7.79938  | 1.39538 | 1.014.E-03 | 0.02447 |
|                   | 22204 | A_09_P064001 | 7.72404  | 1.44709 | 1.512.E-04 | 0.01054 |
|                   | 6091  | A_09_P111250 | 6.51046  | 1.38605 | 3.350.E-03 | 0.04245 |
| nrv3              | 11261 | A_09_P183115 | 9.38808  | 1.64389 | 1.086.E-04 | 0.00943 |
|                   | 14276 | A_09_P194020 | 6.60249  | 1.14232 | 4.335.E-04 | 0.01610 |
|                   | 40071 | A_09_P194995 | 8.44283  | 1.57381 | 7.462.E-05 | 0.00848 |
| Nup358            | 27248 | A_09_P071521 | 11.51392 | 0.77794 | 2.861.E-03 | 0.03962 |
| nvd               | 34459 | A_09_P001271 | 3.54500  | 1.17848 | 1.403.E-03 | 0.02859 |
| nwk               | 27310 | A_09_P054251 | 4.45079  | 2.48664 | 3.541.E-04 | 0.01465 |
|                   | 23671 | A_09_P054251 | 4.30086  | 2.59582 | 4.108.E-04 | 0.01569 |
| olf413            | 40340 | A_09_P035726 | 7.13559  | 2.56315 | 3.784.E-05 | 0.00750 |
|                   | 12059 | A_09_P035726 | 7.51483  | 2.57715 | 5.378.E-05 | 0.00782 |
| Optix             | 24280 | A_09_P077356 | 2.12962  | 1.39630 | 1.339.E-04 | 0.01017 |
| Or98a             | 8565  | A_09_P072436 | 1.58943  | 3.01281 | 4.664.E-05 | 0.00755 |
|                   | 11069 | A_09_P072436 | 1.33908  | 3.49626 | 9.487.E-05 | 0.00916 |
| orb               | 37166 | A_09_P011246 | 10.36217 | 0.98445 | 1.094.E-03 | 0.02544 |
|                   | 16291 | A_09_P011251 | 8.83002  | 1.77385 | 1.572.E-04 | 0.01068 |
|                   | 20239 | A_09_P050141 | 8.41344  | 1.25188 | 2.601.E-04 | 0.01293 |
|                   | 34906 | A_09_P182220 | 9.47575  | 1.61142 | 3.289.E-04 | 0.01448 |
| Ork1              | 8913  | A_09_P031856 | 6.20329  | 1.00081 | 2.324.E-03 | 0.03637 |
|                   | 40854 | A_09_P031856 | 6.36905  | 1.01113 | 1.616.E-03 | 0.03094 |
| Osi2              | 11390 | A_09_P036666 | 1.84275  | 1.06999 | 2.515.E-03 | 0.03746 |
| otp               | 30604 | A_09_P030881 | 5.49524  | 0.74859 | 3.583.E-03 | 0.04379 |
|                   | 35703 | A_09_P030881 | 5.50473  | 0.76397 | 3.446.E-03 | 0.04295 |
| out               | 6378  | A_09_P065116 | 3.24808  | 1.61652 | 2.435.E-03 | 0.03690 |
|                   | 23205 | A_09_P065116 | 3.09205  | 2.33954 | 4.572.E-05 | 0.00755 |
|                   | 72    | A_09_P181240 | 6.15710  | 1.36344 | 1.110.E-03 | 0.02556 |
| ovo               | 24176 | A_09_P134245 | 9.45726  | 2.99455 | 1.379.E-05 | 0.00614 |
| pcl               | 25859 | A_09_P029436 | 7.23735  | 1.23475 | 3.525.E-03 | 0.04339 |
|                   | 12309 | A_09_P151080 | 5.42550  | 1.53364 | 1.346.E-03 | 0.02822 |
| Peritrophin-A     | 3218  | A_09_P033066 | 7.14464  | 1.05166 | 7.543.E-04 | 0.02104 |
|                   | 13265 | A_09_P033066 | 7.32251  | 1.28756 | 5.549.E-04 | 0.01816 |
| pes               | 44208 | A_09_P020551 | 7.91447  | 0.85623 | 3.178.E-03 | 0.04146 |
|                   | 21169 | A_09_P020551 | 8.04017  | 0.90002 | 3.349.E-03 | 0.04245 |
| pex13             | 41711 | A_09_P007186 | 8.88773  | 0.72987 | 4.654.E-03 | 0.04989 |
| pgant2            | 32375 | A_09_P018961 | 6.63724  | 0.95443 | 1.304.E-03 | 0.02760 |
|                   | 16146 | A_09_P018961 | 6.45537  | 0.99859 | 1.190.E-03 | 0.02654 |
|                   | 25281 | A_09_P046461 | 4.81428  | 1.59846 | 2.090.E-04 | 0.01192 |
| pgant8            | 17843 | A_09_P176305 | 4.95447  | 0.88803 | 2.304.E-03 | 0.03631 |
| PGRP-SD           | 42898 | A_09_P053661 | 5.12134  | 2.06881 | 9.199.E-04 | 0.02333 |
| pip               | 27136 | A_09_P044091 | 6.70287  | 0.89481 | 2.424.E-03 | 0.03688 |
|                   | 37959 | A_09_P044106 | 3.19722  | 0.74930 | 3.829.E-03 | 0.04504 |
|                   | 12488 | A_09_P044106 | 2.10416  | 1.77028 | 7.868.E-04 | 0.02146 |
| piwi <sup>2</sup> | 12346 | A_09_P011196 | 9.81845  | 0.72688 | 4.250.E-03 | 0.04753 |
| Pole2             | 41533 | A_09_P053081 | 7.57541  | 1.05258 | 4.544.E-03 | 0.04929 |
| ppk25             | 9326  | A_09_P017586 | 6.78252  | 1.19539 | 1.300.E-03 | 0.02759 |
|                   | 21855 | A_09_P017586 | 6.53069  | 1.25011 | 1.654.E-03 | 0.03114 |
| Ptp61F            | 28528 | A_09_P186330 | 8.88904  | 1.05424 | 3.358.E-03 | 0.04249 |
|                   | 28726 | A_09_P208270 | 9.24918  | 1.14027 | 2.680.E-03 | 0.03830 |
| ptr               | 17411 | A_09_P044251 | 8.32461  | 1.04079 | 1.148.E-03 | 0.02604 |
| Pxt               | 38691 | A_09_P076266 | 9.72739  | 2.02480 | 6.388.E-05 | 0.00827 |
|                   | 40153 | A_09_P076266 | 9.65551  | 2.05329 | 7.172.E-05 | 0.00848 |
| qin               | 42962 | A_09_P068931 | 9.26062  | 0.82135 | 2.949.E-03 | 0.04013 |
|                   | 13327 | A_09_P068931 | 9.35063  | 0.82767 | 2.294.E-03 | 0.03628 |
|                   | 42009 | A_09_P163755 | 10.52872 | 1.14506 | 6.228.E-04 | 0.01916 |
|                   | 27447 | A_09_P206515 | 11.28578 | 1.05972 | 9.466.E-04 | 0.02364 |
| r-1               | 21963 | A_09_P044421 | 11.18524 | 0.81127 | 2.346.E-03 | 0.03643 |
| Rad51D            | 14015 | A_09_P040131 | 4.26700  | 0.74996 | 3.444.E-03 | 0.04295 |
| Rcd4              | 9227  | A_09_P020831 | 10.67925 | 0.82988 | 2.561.E-03 | 0.03778 |
|                   | 7097  | A_09_P020831 | 10.42750 | 0.95393 | 2.008.E-03 | 0.03424 |
| RecQ4             | 3236  | A_09_P049651 | 9.51218  | 0.80247 | 2.419.E-03 | 0.03686 |
| retn              | 6895  | A_09_P184730 | 6.92206  | 2.17384 | 1.828.E-05 | 0.00620 |
| rhi               | 42902 | A_09_P010496 | 7.30921  | 0.86864 | 2.838.E-03 | 0.03948 |

|            |       |              |          |         |            |         |
|------------|-------|--------------|----------|---------|------------|---------|
|            | 33161 | A_09_P010496 | 7.48053  | 0.92478 | 1.486.E-03 | 0.02961 |
| Rhp        | 13984 | A_09_P203000 | 8.38214  | 0.83368 | 3.647.E-03 | 0.04434 |
| RnrS       | 9148  | A_09_P013416 | 10.75776 | 1.16878 | 3.682.E-04 | 0.01479 |
|            | 26541 | A_09_P013416 | 10.40492 | 1.21757 | 4.030.E-04 | 0.01553 |
| RpI135     | 24949 | A_09_P044476 | 7.08459  | 1.05528 | 1.669.E-03 | 0.03133 |
| RpL22-like | 32995 | A_09_P026846 | 12.48789 | 0.76439 | 3.762.E-03 | 0.04466 |
|            | 2427  | A_09_P026846 | 12.57733 | 0.82294 | 2.346.E-03 | 0.03643 |
| RpS23      | 27238 | A_09_P147930 | 7.71298  | 1.03666 | 2.718.E-03 | 0.03855 |
| Rpt4R      | 31156 | A_09_P055181 | 9.34162  | 1.72181 | 4.912.E-05 | 0.00755 |
|            | 536   | A_09_P055181 | 9.14790  | 1.81370 | 6.758.E-05 | 0.00827 |
| rt         | 21510 | A_09_P044491 | 7.48664  | 0.88116 | 4.682.E-03 | 0.04995 |
| Samuel     | 42495 | A_09_P110020 | 2.57092  | 2.11664 | 4.900.E-05 | 0.00755 |
| Sip1       | 2122  | A_09_P012691 | 7.04629  | 2.17087 | 1.680.E-05 | 0.00614 |
| SIP2       | 21826 | A_09_P001836 | 2.57423  | 1.02739 | 1.053.E-03 | 0.02491 |
| SIP3       | 30979 | A_09_P001831 | 4.68607  | 1.44373 | 2.317.E-04 | 0.01246 |
|            | 42026 | A_09_P001831 | 4.63091  | 1.60140 | 1.589.E-04 | 0.01068 |
| SK         | 5891  | A_09_P067206 | 5.88828  | 1.11847 | 1.650.E-03 | 0.03112 |
|            | 20577 | A_09_P067206 | 5.74826  | 1.65960 | 2.427.E-04 | 0.01261 |
|            | 10575 | A_09_P140795 | 3.39093  | 1.19753 | 4.728.E-04 | 0.01674 |
| smg-30     | 18243 | A_09_P075141 | 2.94408  | 1.00536 | 1.668.E-03 | 0.03133 |
| Sod        | 33844 | A_09_P206585 | 11.70559 | 1.22420 | 1.736.E-03 | 0.03202 |
| Sodh-2     | 22800 | A_09_P032981 | 8.71579  | 1.15443 | 6.388.E-04 | 0.01941 |
| Spargel    | 42961 | A_09_P036066 | 9.29096  | 0.78814 | 2.638.E-03 | 0.03819 |
|            | 15141 | A_09_P036066 | 9.45071  | 0.92574 | 1.302.E-03 | 0.02759 |
| spd-2      | 23052 | A_09_P079366 | 8.65395  | 1.10390 | 9.637.E-04 | 0.02394 |
| squ        | 33919 | A_09_P043511 | 8.36509  | 2.10795 | 2.065.E-04 | 0.01192 |
|            | 24365 | A_09_P043511 | 8.22563  | 2.18953 | 1.344.E-04 | 0.01017 |
|            | 11366 | A_09_P183335 | 10.84434 | 1.60551 | 5.265.E-04 | 0.01760 |
| Sr-CII     | 41149 | A_09_P032281 | 6.21994  | 1.85155 | 3.055.E-05 | 0.00710 |
|            | 29331 | A_09_P032281 | 6.18564  | 1.98368 | 2.128.E-05 | 0.00643 |
| Src64B     | 18547 | A_09_P177640 | 9.59919  | 0.74301 | 4.520.E-03 | 0.04913 |
| stnA       | 18399 | A_09_P031726 | 3.33443  | 1.12302 | 1.158.E-03 | 0.02612 |
|            | 3693  | A_09_P031726 | 2.97305  | 1.18137 | 4.935.E-04 | 0.01698 |
| Tace       | 9895  | A_09_P061201 | 6.63546  | 1.39977 | 1.546.E-04 | 0.01068 |
|            | 8764  | A_09_P061201 | 6.87018  | 1.43754 | 2.406.E-04 | 0.01261 |
|            | 35353 | A_09_P146000 | 6.33923  | 1.54903 | 3.392.E-04 | 0.01453 |
| tej        | 43307 | A_09_P007621 | 10.53115 | 1.17814 | 3.655.E-04 | 0.01478 |
|            | 20904 | A_09_P007621 | 10.67833 | 1.19986 | 3.243.E-04 | 0.01440 |
| Thd1       | 39076 | A_09_P078941 | 6.39539  | 0.97511 | 4.485.E-03 | 0.04890 |
|            | 38071 | A_09_P078941 | 6.39104  | 1.03998 | 2.160.E-03 | 0.03546 |
| tio        | 1169  | A_09_P117925 | 2.92021  | 1.92329 | 2.551.E-05 | 0.00683 |
| Tm1        | 8716  | A_09_P009761 | 9.60208  | 0.92074 | 2.613.E-03 | 0.03802 |
|            | 29875 | A_09_P009766 | 10.50495 | 0.73479 | 3.684.E-03 | 0.04457 |
|            | 19811 | A_09_P051276 | 7.68926  | 0.93771 | 2.242.E-03 | 0.03604 |
|            | 8909  | A_09_P222575 | 9.86525  | 0.79671 | 2.991.E-03 | 0.04025 |
| TM4SF      | 13973 | A_09_P032271 | 6.85766  | 0.74671 | 4.146.E-03 | 0.04697 |
|            | 40692 | A_09_P193295 | 8.96559  | 0.74827 | 3.751.E-03 | 0.04465 |
| Tpi        | 30955 | A_09_P048636 | 4.87234  | 2.83220 | 5.649.E-06 | 0.00581 |
|            | 31132 | A_09_P048636 | 4.78340  | 2.89566 | 2.536.E-06 | 0.00581 |
|            | 35695 | A_09_P146560 | 4.42384  | 0.98157 | 2.151.E-03 | 0.03542 |
| Tusp       | 1795  | A_09_P072391 | 7.15992  | 1.45967 | 1.133.E-04 | 0.00957 |
|            | 16451 | A_09_P103905 | 7.60642  | 1.38417 | 3.006.E-04 | 0.01382 |
| TyrRII     | 41943 | A_09_P113315 | 2.85937  | 0.86322 | 2.958.E-03 | 0.04013 |
| UK114      | 27747 | A_09_P065256 | 5.66720  | 0.75818 | 4.504.E-03 | 0.04905 |
| Vha100-2   | 32000 | A_09_P065571 | 7.66057  | 1.09828 | 2.037.E-03 | 0.03442 |
| Vha14      | 43477 | A_09_P012491 | 10.15813 | 0.90016 | 3.072.E-03 | 0.04082 |
|            | 12154 | A_09_P012491 | 10.50298 | 0.95263 | 1.366.E-03 | 0.02826 |
| Vsx2       | 17887 | A_09_P000916 | 3.39454  | 1.02729 | 4.655.E-03 | 0.04989 |
| wcd        | 17401 | A_09_P032871 | 8.29566  | 0.85746 | 3.458.E-03 | 0.04299 |
|            | 3601  | A_09_P032871 | 8.14105  | 0.89827 | 2.953.E-03 | 0.04013 |
| WRNexo     | 42255 | A_09_P068851 | 7.99140  | 0.89637 | 3.429.E-03 | 0.04283 |
|            | 5551  | A_09_P068851 | 7.88870  | 1.12812 | 4.627.E-04 | 0.01664 |
|            | 10226 | A_09_P121180 | 6.95113  | 1.25403 | 2.704.E-04 | 0.01327 |
| WscK       | 43234 | A_09_P057126 | 5.65839  | 1.78685 | 8.925.E-05 | 0.00894 |
|            | 6602  | A_09_P057126 | 6.10104  | 1.93007 | 5.806.E-05 | 0.00798 |

|          |       |              |         |         |            |         |
|----------|-------|--------------|---------|---------|------------|---------|
|          | 15966 | A_09_P109735 | 7.50715 | 1.09692 | 5.673.E-04 | 0.01842 |
| wun      | 29278 | A_09_P107200 | 8.90602 | 0.83181 | 4.134.E-03 | 0.04695 |
| X11Lbeta | 20683 | A_09_P016181 | 8.50393 | 0.74111 | 3.747.E-03 | 0.04465 |
|          | 5628  | A_09_P110490 | 9.70257 | 1.19622 | 1.071.E-03 | 0.02516 |
|          | 27079 | A_09_P162075 | 9.66480 | 2.28391 | 8.358.E-05 | 0.00880 |
|          | 20516 | A_09_P175655 | 8.10764 | 2.52931 | 1.481.E-04 | 0.01048 |
|          | 31465 | A_09_P183230 | 6.24915 | 1.41219 | 2.327.E-04 | 0.01246 |
| yip3     | 15888 | A_09_P062256 | 7.91497 | 0.89117 | 4.421.E-03 | 0.04858 |
| yip7     | 23457 | A_09_P062251 | 4.06294 | 1.38799 | 7.092.E-04 | 0.02035 |
|          | 40401 | A_09_P062251 | 4.22243 | 1.41459 | 1.589.E-04 | 0.01068 |
| yl       | 44405 | A_09_P010936 | 7.27731 | 1.87818 | 7.693.E-05 | 0.00851 |
|          | 21111 | A_09_P010936 | 7.38170 | 2.08576 | 8.432.E-05 | 0.00880 |
|          | 19682 | A_09_P106275 | 5.29924 | 2.02206 | 4.531.E-05 | 0.00755 |

## Supplementary Table S2. List of genes up-regulated in Ovo-B KD PGCs

\* This table shows the names of genes and probes whose expression levels were significantly up-regulated in Ovo-A-expressing PGCs in comparison with control PGCs (q-value < 0.05; see SI Materials and Methods). *nos* probe, which detected the *nos* 3'UTR region, is excluded from this table (see SI Materials and Methods). In addition, one of the two *ovo* probes detecting the *ovo-A* transcript over-expressed from *UASp-Ovo-A* in PGCs was excluded.

† Using a linear model, the intercept and genotype effect (*G*) values were calculated for each probe (see SI Materials and Methods). The intercept value represents the estimated expression value in one of the biological replicates of Ovo-A-expressing PGCs in log<sub>2</sub> scale. The genotype effect value represents the estimated fold change (control PGCs / Ovo-A-expressing PGCs) in log<sub>2</sub> scale.

| Gene Name* | Feature Number (GPL17080) | Probe Name*  | Intercept† | Genotype effect [Fold Change: log <sub>2</sub> (Cont./Ovo-A oe)]† | p-value   | q-value |
|------------|---------------------------|--------------|------------|-------------------------------------------------------------------|-----------|---------|
| 5-HT1A     | 43665                     | A_09_P010201 | 4.88620    | -1.29298                                                          | 7.603E-04 | 0.02114 |
|            | 23027                     | A_09_P010201 | 5.04582    | -1.07664                                                          | 6.282E-04 | 0.01922 |
| abd-A      | 12788                     | A_09_P041071 | 8.82588    | -4.65331                                                          | 3.530E-05 | 0.00750 |
|            | 22071                     | A_09_P041071 | 8.84113    | -4.30235                                                          | 3.853E-05 | 0.00750 |
|            | 5347                      | A_09_P052391 | 9.32651    | -1.52833                                                          | 9.107E-05 | 0.00901 |
| Abd-B      | 40218                     | A_09_P052351 | 7.73206    | -2.65341                                                          | 3.583E-04 | 0.01468 |
|            | 20805                     | A_09_P052346 | 7.72384    | -2.59784                                                          | 2.087E-05 | 0.00643 |
|            | 26764                     | A_09_P041076 | 10.15074   | -1.91713                                                          | 3.932E-04 | 0.01537 |
|            | 29190                     | A_09_P041076 | 10.24545   | -1.80021                                                          | 3.596E-04 | 0.01468 |
|            | 35341                     | A_09_P051891 | 7.94651    | -1.42704                                                          | 9.798E-04 | 0.02405 |
| Ac78C      | 21915                     | A_09_P076641 | 6.16453    | -2.16062                                                          | 4.156E-05 | 0.00750 |
|            | 33688                     | A_09_P076641 | 6.15068    | -2.00685                                                          | 1.751E-04 | 0.01137 |
| AcCoAS     | 13391                     | A_09_P029491 | 8.28247    | -0.83384                                                          | 2.902E-03 | 0.03994 |
| Acp53C14b  | 16294                     | A_09_P008461 | 6.33078    | -1.07001                                                          | 2.406E-03 | 0.03686 |
| Acp76A     | 32605                     | A_09_P031021 | 5.47733    | -1.82085                                                          | 9.175E-04 | 0.02333 |
|            | 8601                      | A_09_P031021 | 5.34418    | -1.74131                                                          | 9.602E-05 | 0.00916 |
|            | 22687                     | A_09_P113135 | 5.18700    | -1.32670                                                          | 4.559E-04 | 0.01654 |
| Actbeta    | 19531                     | A_09_P077111 | 8.12811    | -1.46589                                                          | 9.382E-04 | 0.02356 |
|            | 28381                     | A_09_P077111 | 8.06478    | -1.46208                                                          | 5.756E-04 | 0.01852 |
| ade5       | 8843                      | A_09_P032451 | 12.41676   | -0.82462                                                          | 2.430E-03 | 0.03690 |
|            | 435                       | A_09_P032451 | 12.09536   | -0.81867                                                          | 4.222E-03 | 0.04735 |
| Adk3       | 29007                     | A_09_P064471 | 12.09433   | -1.43622                                                          | 1.173E-04 | 0.00968 |
|            | 23085                     | A_09_P064471 | 12.00691   | -1.38244                                                          | 2.145E-04 | 0.01209 |
| Aldh       | 20565                     | A_09_P029496 | 8.25741    | -1.09435                                                          | 7.831E-04 | 0.02141 |
|            | 29958                     | A_09_P029496 | 8.23857    | -1.03488                                                          | 8.952E-04 | 0.02299 |
| Aldh-III   | 16256                     | A_09_P181080 | 11.15100   | -0.82655                                                          | 3.991E-03 | 0.04619 |
| alphaPS4   | 9239                      | A_09_P213310 | 7.90447    | -0.98961                                                          | 2.653E-03 | 0.03825 |
|            | 17265                     | A_09_P007946 | 6.07868    | -0.85363                                                          | 3.929E-03 | 0.04582 |
| Andorra    | 27781                     | A_09_P040031 | 4.33422    | -2.12321                                                          | 1.939E-03 | 0.03363 |
| AnnIX      | 38045                     | A_09_P166180 | 10.36516   | -0.93589                                                          | 3.005E-03 | 0.04034 |
| aop        | 2136                      | A_09_P041291 | 10.35195   | -1.24297                                                          | 7.983E-04 | 0.02168 |
|            | 32150                     | A_09_P041291 | 10.55751   | -1.23171                                                          | 1.029E-03 | 0.02455 |
| Arc1       | 16628                     | A_09_P007636 | 8.60343    | -0.98051                                                          | 2.054E-03 | 0.03460 |
|            | 14034                     | A_09_P007636 | 8.58192    | -0.86109                                                          | 4.493E-03 | 0.04895 |
| Arc2       | 717                       | A_09_P007646 | 6.71058    | -1.75783                                                          | 4.409E-05 | 0.00750 |
|            | 12683                     | A_09_P007646 | 6.77227    | -1.71420                                                          | 4.358E-05 | 0.00750 |
| ASPP       | 988                       | A_09_P026031 | 9.39928    | -1.48103                                                          | 5.765E-04 | 0.01852 |
|            | 23764                     | A_09_P026031 | 9.30898    | -1.38254                                                          | 4.477E-04 | 0.01634 |
| Ast-C      | 19513                     | A_09_P151090 | 4.02196    | -0.81309                                                          | 2.443E-03 | 0.03690 |
| bbg        | 13649                     | A_09_P048181 | 9.75868    | -0.77625                                                          | 3.375E-03 | 0.04260 |
| Best1      | 42359                     | A_09_P107175 | 8.02604    | -1.01017                                                          | 4.626E-03 | 0.04972 |
|            | 37472                     | A_09_P062481 | 11.13896   | -0.81767                                                          | 4.575E-03 | 0.04949 |
| Best2      | 12996                     | A_09_P053256 | 6.05646    | -2.17707                                                          | 4.156E-05 | 0.00750 |
|            | 34214                     | A_09_P053256 | 5.86832    | -1.86535                                                          | 8.041E-04 | 0.02169 |
| betaTub60D | 38436                     | A_09_P009901 | 7.20770    | -1.36343                                                          | 3.328E-04 | 0.01453 |
|            | 25740                     | A_09_P009901 | 7.25615    | -1.22272                                                          | 1.254E-03 | 0.02712 |
| BG642312   | 10941                     | A_09_P057276 | 4.92469    | -3.15451                                                          | 6.161E-04 | 0.01910 |

|         |       |              |          |          |           |         |
|---------|-------|--------------|----------|----------|-----------|---------|
|         | 3992  | A_09_P057276 | 4.74260  | -2.58092 | 1.725E-03 | 0.03199 |
| bgm     | 14579 | A_09_P079256 | 8.59979  | -0.87859 | 2.992E-03 | 0.04025 |
|         | 4531  | A_09_P079256 | 8.44638  | -0.86023 | 3.299E-03 | 0.04216 |
|         | 5272  | A_09_P110773 | 10.10705 | -0.82139 | 3.379E-03 | 0.04260 |
| blot    | 3575  | A_09_P079886 | 7.54998  | -2.44042 | 2.343E-03 | 0.03643 |
|         | 24204 | A_09_P079886 | 7.71122  | -2.39978 | 1.041E-03 | 0.02469 |
| bnb     | 3533  | A_09_P042516 | 12.93538 | -1.05711 | 7.063E-04 | 0.02035 |
|         | 26570 | A_09_P042516 | 12.72112 | -0.99733 | 1.171E-03 | 0.02634 |
| bow1    | 11503 | A_09_P011276 | 6.07733  | -1.46985 | 8.292E-04 | 0.02206 |
|         | 33128 | A_09_P011276 | 5.82521  | -1.22790 | 3.132E-03 | 0.04112 |
| Brd     | 7429  | A_09_P041496 | 3.47105  | -1.57909 | 6.381E-04 | 0.01941 |
|         | 45209 | A_09_P041496 | 3.37207  | -1.52591 | 4.206E-04 | 0.01584 |
| brp     | 30218 | A_09_P215895 | 6.47167  | -0.91484 | 3.925E-03 | 0.04582 |
| bru:2   | 21208 | A_09_P056661 | 6.39715  | -1.34279 | 3.481E-03 | 0.04307 |
|         | 4274  | A_09_P056661 | 6.39904  | -1.24075 | 3.136E-03 | 0.04114 |
|         | 20031 | A_09_P226000 | 8.70126  | -0.84767 | 2.781E-03 | 0.03909 |
| Buffy   | 3362  | A_09_P063031 | 8.23384  | -1.14835 | 5.882E-04 | 0.01866 |
| Calx    | 38079 | A_09_P051221 | 6.00843  | -1.20751 | 3.181E-03 | 0.04148 |
| capa    | 37147 | A_09_P104995 | 5.82228  | -1.43551 | 1.431E-03 | 0.02900 |
| CBP     | 10636 | A_09_P106320 | 11.72879 | -1.38570 | 1.612E-04 | 0.01079 |
| Cct2    | 6054  | A_09_P028321 | 6.84936  | -0.83478 | 4.063E-03 | 0.04660 |
| Cda9    | 28905 | A_09_P008611 | 4.87275  | -1.23047 | 2.823E-04 | 0.01338 |
| CG10082 | 17141 | A_09_P109995 | 11.32154 | -1.20117 | 1.711E-03 | 0.03195 |
|         | 16771 | A_09_P026136 | 11.33588 | -1.09765 | 1.808E-03 | 0.03235 |
| CG10176 | 2508  | A_09_P023131 | 4.20303  | -1.00795 | 3.697E-03 | 0.04459 |
| CG10337 | 18581 | A_09_P023536 | 11.41697 | -0.94877 | 2.084E-03 | 0.03493 |
| CG10630 | 32420 | A_09_P218915 | 15.32646 | -0.82160 | 3.355E-03 | 0.04249 |
| CG10764 | 23975 | A_09_P008686 | 5.75397  | -1.36667 | 2.692E-03 | 0.03830 |
|         | 31850 | A_09_P008686 | 5.79399  | -1.31212 | 2.034E-03 | 0.03442 |
| CG11033 | 37635 | A_09_P072866 | 10.12426 | -1.29093 | 2.660E-04 | 0.01313 |
|         | 36960 | A_09_P072866 | 10.16106 | -1.27785 | 2.520E-04 | 0.01286 |
| CG1124  | 19971 | A_09_P036191 | 5.40921  | -1.45253 | 6.241E-04 | 0.01917 |
| CG11275 | 16210 | A_09_P026356 | 9.16507  | -1.71959 | 1.316E-04 | 0.01017 |
|         | 26498 | A_09_P026356 | 9.25067  | -1.58540 | 1.540E-04 | 0.01067 |
| CG11289 | 558   | A_09_P020261 | 6.89787  | -1.75447 | 1.466E-04 | 0.01048 |
|         | 9892  | A_09_P020261 | 6.96303  | -1.68795 | 1.115E-04 | 0.00954 |
| CG11347 | 34645 | A_09_P052686 | 7.81329  | -3.38167 | 3.358E-06 | 0.00581 |
|         | 43192 | A_09_P052686 | 7.49549  | -3.23783 | 7.974E-06 | 0.00581 |
| CG11400 | 12926 | A_09_P008616 | 5.36361  | -0.75674 | 3.429E-03 | 0.04283 |
| CG11669 | 19406 | A_09_P025166 | 7.10233  | -1.60662 | 3.032E-03 | 0.04057 |
|         | 34765 | A_09_P025166 | 6.96728  | -1.57796 | 8.005E-04 | 0.02168 |
| CG11825 | 43977 | A_09_P107930 | 9.33970  | -1.48870 | 2.301E-04 | 0.01246 |
|         | 25124 | A_09_P006106 | 9.95881  | -1.38373 | 1.807E-04 | 0.01142 |
|         | 9572  | A_09_P176590 | 9.57296  | -1.18176 | 2.549E-03 | 0.03772 |
| CG11883 | 27645 | A_09_P006151 | 9.63018  | -0.79628 | 2.762E-03 | 0.03895 |
| CG11997 | 12716 | A_09_P072881 | 7.55794  | -0.99075 | 1.372E-03 | 0.02826 |
|         | 34345 | A_09_P072881 | 7.48228  | -0.98172 | 3.381E-03 | 0.04260 |
|         | 10118 | A_09_P072881 | 7.40103  | -0.93975 | 2.682E-03 | 0.03830 |
|         | 39899 | A_09_P072881 | 7.39247  | -0.93290 | 3.692E-03 | 0.04458 |
|         | 8328  | A_09_P072881 | 7.49420  | -0.92961 | 3.267E-03 | 0.04201 |
|         | 38880 | A_09_P072881 | 7.39461  | -0.91766 | 4.038E-03 | 0.04642 |
|         | 9511  | A_09_P072881 | 7.52736  | -0.89966 | 3.566E-03 | 0.04369 |
| CG12035 | 8485  | A_09_P028481 | 6.17414  | -0.82724 | 2.686E-03 | 0.03830 |
| CG12071 | 18751 | A_09_P061516 | 9.58070  | -0.72020 | 4.454E-03 | 0.04877 |
| CG12171 | 36148 | A_09_P036451 | 7.31222  | -1.27095 | 2.153E-03 | 0.03542 |
|         | 35902 | A_09_P036451 | 7.38530  | -1.24402 | 1.811E-03 | 0.03235 |
| CG12214 | 23385 | A_09_P006016 | 11.33162 | -0.95740 | 4.698E-03 | 0.04995 |
| CG12262 | 39508 | A_09_P053671 | 11.36774 | -1.01017 | 9.716E-04 | 0.02399 |
|         | 21243 | A_09_P053671 | 11.55169 | -0.94926 | 1.345E-03 | 0.02822 |
| CG12420 | 42252 | A_09_P073411 | 3.56460  | -1.63101 | 2.532E-04 | 0.01286 |
|         | 4402  | A_09_P073411 | 3.84340  | -1.11513 | 1.721E-03 | 0.03196 |
|         | 27977 | A_09_P217695 | 5.34113  | -0.85730 | 2.663E-03 | 0.03829 |
| CG12512 | 4762  | A_09_P019566 | 7.29005  | -1.57165 | 2.429E-04 | 0.01261 |
|         | 24972 | A_09_P019566 | 7.13150  | -1.02811 | 4.563E-03 | 0.04941 |
| CG12535 | 30770 | A_09_P066821 | 9.61003  | -1.16193 | 1.254E-03 | 0.02712 |



|         |       |              |          |          |           |         |
|---------|-------|--------------|----------|----------|-----------|---------|
|         | 29934 | A_09_P066821 | 9.66773  | -1.12752 | 2.152E-03 | 0.03542 |
|         | 2002  | A_09_P101155 | 9.90208  | -0.82996 | 4.455E-03 | 0.04877 |
| CG12581 | 6222  | A_09_P035926 | 8.65017  | -1.50271 | 3.258E-03 | 0.04201 |
| CG12730 | 12559 | A_09_P067256 | 6.71834  | -1.53057 | 1.802E-04 | 0.01142 |
|         | 31911 | A_09_P067256 | 6.60653  | -1.51118 | 6.624E-04 | 0.01968 |
|         | 10927 | A_09_P067256 | 6.84929  | -1.50347 | 9.479E-04 | 0.02364 |
|         | 26014 | A_09_P067256 | 6.66112  | -1.49858 | 1.098E-03 | 0.02548 |
|         | 21173 | A_09_P067256 | 6.58117  | -1.48500 | 3.927E-04 | 0.01537 |
|         | 9464  | A_09_P067256 | 6.81766  | -1.45104 | 6.832E-04 | 0.02006 |
|         | 41888 | A_09_P067256 | 6.40474  | -1.34042 | 8.561E-04 | 0.02248 |
|         | 25527 | A_09_P067256 | 6.52118  | -1.33013 | 6.613E-04 | 0.01968 |
|         | 34019 | A_09_P067256 | 6.54865  | -1.30426 | 1.018E-03 | 0.02450 |
|         | 5280  | A_09_P067256 | 6.52353  | -1.22799 | 9.757E-04 | 0.02401 |
| CG12768 | 37853 | A_09_P035906 | 7.42334  | -2.68350 | 7.207E-05 | 0.00848 |
|         | 31874 | A_09_P035906 | 7.07584  | -2.26927 | 1.288E-04 | 0.01012 |
|         | 17076 | A_09_P127480 | 6.28394  | -2.24731 | 1.303E-04 | 0.01014 |
| CG12814 | 36279 | A_09_P073406 | 5.81459  | -1.85248 | 3.122E-03 | 0.04110 |
|         | 20668 | A_09_P217690 | 9.08785  | -0.88986 | 1.865E-03 | 0.03304 |
| CG12896 | 13280 | A_09_P006111 | 6.98697  | -1.38091 | 5.171E-04 | 0.01748 |
| CG12917 | 1139  | A_09_P006001 | 8.58976  | -0.88944 | 4.416E-03 | 0.04857 |
| CG13004 | 11377 | A_09_P039601 | 6.12177  | -1.91026 | 6.988E-04 | 0.02022 |
|         | 27472 | A_09_P193025 | 5.59401  | -1.59879 | 2.127E-03 | 0.03511 |
| CG13028 | 30651 | A_09_P033806 | 7.49499  | -0.76042 | 3.295E-03 | 0.04212 |
| CG13085 | 32304 | A_09_P023441 | 7.92719  | -1.22269 | 1.348E-03 | 0.02822 |
| CG13160 | 28256 | A_09_P213470 | 4.81284  | -1.69546 | 4.348E-03 | 0.04815 |
|         | 36716 | A_09_P190165 | 4.57525  | -0.79817 | 3.944E-03 | 0.04583 |
| CG13177 | 5089  | A_09_P063516 | 10.75268 | -0.89251 | 2.857E-03 | 0.03958 |
| CG13239 | 4715  | A_09_P111480 | 5.51164  | -1.39317 | 1.567E-04 | 0.01068 |
| CG13252 | 35449 | A_09_P035206 | 4.53344  | -2.54063 | 4.214E-03 | 0.04733 |
|         | 27084 | A_09_P035206 | 4.29299  | -1.86880 | 4.089E-04 | 0.01566 |
| CG13253 | 10301 | A_09_P217515 | 4.21507  | -1.39896 | 8.450E-04 | 0.02231 |
| CG13323 | 29901 | A_09_P216360 | 7.30796  | -0.81321 | 2.414E-03 | 0.03686 |
| CG13360 | 12977 | A_09_P077556 | 7.20492  | -1.02622 | 2.232E-03 | 0.03600 |
| CG13405 | 6131  | A_09_P027831 | 11.20524 | -0.96226 | 3.639E-03 | 0.04429 |
|         | 32895 | A_09_P027831 | 11.15423 | -0.96177 | 3.506E-03 | 0.04324 |
| CG13481 | 9487  | A_09_P217425 | 7.26665  | -0.83636 | 3.586E-03 | 0.04381 |
| CG13506 | 25461 | A_09_P026436 | 6.14908  | -0.73265 | 4.020E-03 | 0.04634 |
| CG13579 | 14293 | A_09_P027496 | 6.90784  | -1.92530 | 5.697E-04 | 0.01842 |
|         | 5767  | A_09_P027496 | 7.03266  | -1.62333 | 1.186E-03 | 0.02653 |
| CG13830 | 10070 | A_09_P070546 | 6.53033  | -1.33188 | 2.134E-04 | 0.01208 |
|         | 30719 | A_09_P208300 | 7.28016  | -0.93387 | 2.020E-03 | 0.03429 |
| CG13868 | 10349 | A_09_P025661 | 9.36663  | -3.21434 | 2.287E-05 | 0.00666 |
|         | 4276  | A_09_P025661 | 9.08431  | -2.97264 | 1.177E-05 | 0.00594 |
| CG13928 | 34987 | A_09_P028391 | 10.33402 | -1.38823 | 1.105E-03 | 0.02556 |
| CG14034 | 20298 | A_09_P019511 | 3.37468  | -1.84677 | 1.437E-04 | 0.01046 |
| CG14253 | 32595 | A_09_P185065 | 9.91043  | -0.81271 | 2.870E-03 | 0.03966 |
| CG14277 | 32806 | A_09_P020711 | 7.15704  | -1.05752 | 2.548E-03 | 0.03772 |
| CG14302 | 6122  | A_09_P068971 | 6.38724  | -0.87226 | 2.576E-03 | 0.03784 |
| CG14315 | 2328  | A_09_P111570 | 6.78272  | -1.26156 | 7.634E-04 | 0.02115 |
|         | 39303 | A_09_P068701 | 7.14255  | -0.83815 | 2.618E-03 | 0.03806 |
| CG14439 | 40675 | A_09_P130240 | 7.16030  | -1.20323 | 1.810E-03 | 0.03235 |
| CG14492 | 16325 | A_09_P008916 | 6.16031  | -0.97538 | 2.019E-03 | 0.03429 |
|         | 7471  | A_09_P008916 | 6.07434  | -0.71984 | 4.586E-03 | 0.04957 |
| CG14527 | 40583 | A_09_P060730 | 8.17382  | -1.01557 | 4.148E-03 | 0.04697 |
| CG14535 | 44533 | A_09_P020516 | 11.00899 | -2.21957 | 4.001E-04 | 0.01552 |
|         | 4263  | A_09_P020516 | 11.07164 | -2.12554 | 3.502E-04 | 0.01461 |
| CG14589 | 40883 | A_09_P024391 | 4.56428  | -1.70202 | 3.191E-03 | 0.04151 |
|         | 12999 | A_09_P024391 | 4.94810  | -1.60769 | 1.464E-03 | 0.02928 |
| CG14628 | 40661 | A_09_P062856 | 9.85539  | -0.93015 | 3.972E-03 | 0.04605 |
|         | 27641 | A_09_P062856 | 9.88449  | -0.86527 | 3.227E-03 | 0.04178 |
| CG14661 | 35287 | A_09_P036181 | 3.80736  | -2.35413 | 2.341E-03 | 0.03643 |
| CG14708 | 37492 | A_09_P073861 | 9.12790  | -1.24566 | 5.968E-04 | 0.01885 |
|         | 40241 | A_09_P148460 | 8.32330  | -1.22822 | 4.398E-04 | 0.01626 |
| CG14718 | 11745 | A_09_P073986 | 6.40672  | -0.86663 | 4.012E-03 | 0.04631 |
| CG14741 | 12883 | A_09_P074166 | 7.15423  | -0.91010 | 2.467E-03 | 0.03704 |

|         |       |              |          |          |           |         |
|---------|-------|--------------|----------|----------|-----------|---------|
| CG14840 | 1721  | A_09_P075006 | 4.01688  | -0.94920 | 1.911E-03 | 0.03340 |
| CG14915 | 14177 | A_09_P217065 | 5.78055  | -1.32382 | 8.244E-04 | 0.02200 |
|         | 23204 | A_09_P021896 | 3.63001  | -1.22148 | 9.916E-04 | 0.02419 |
|         | 14166 | A_09_P021896 | 3.74808  | -1.09734 | 6.036E-04 | 0.01897 |
| CG1492  | 14833 | A_09_P037971 | 8.63129  | -1.02127 | 2.867E-03 | 0.03966 |
|         | 29013 | A_09_P037971 | 8.49738  | -0.95766 | 2.393E-03 | 0.03678 |
| CG14937 | 28453 | A_09_P022071 | 9.24047  | -1.37077 | 5.003E-04 | 0.01710 |
|         | 21725 | A_09_P022071 | 9.19263  | -1.22106 | 7.178E-04 | 0.02048 |
| CG14961 | 19351 | A_09_P029096 | 10.02987 | -1.14175 | 7.940E-04 | 0.02161 |
| CG14968 | 15551 | A_09_P029061 | 8.60816  | -0.80225 | 4.479E-03 | 0.04890 |
| CG15056 | 31948 | A_09_P040081 | 9.68487  | -0.96720 | 3.706E-03 | 0.04460 |
| CG15098 | 15610 | A_09_P009296 | 11.94329 | -0.83388 | 2.450E-03 | 0.03690 |
|         | 13965 | A_09_P009296 | 11.87818 | -0.78679 | 3.817E-03 | 0.04497 |
| CG15247 | 5017  | A_09_P068596 | 2.85645  | -1.01613 | 3.912E-03 | 0.04569 |
| CG15357 | 25166 | A_09_P063426 | 7.59969  | -0.95585 | 2.665E-03 | 0.03829 |
|         | 42611 | A_09_P063426 | 7.61405  | -0.94079 | 2.962E-03 | 0.04013 |
| CG15414 | 32249 | A_09_P111710 | 6.99707  | -1.62020 | 1.451E-04 | 0.01046 |
| CG15479 | 4850  | A_09_P022531 | 6.08417  | -2.49881 | 1.147E-05 | 0.00591 |
|         | 19585 | A_09_P022531 | 6.17359  | -2.46842 | 2.984E-05 | 0.00710 |
|         | 9107  | A_09_P022531 | 6.14726  | -2.46643 | 9.885E-06 | 0.00581 |
|         | 43269 | A_09_P022531 | 5.93971  | -2.44884 | 3.195E-04 | 0.01437 |
|         | 45086 | A_09_P022531 | 5.98073  | -2.41092 | 8.678E-06 | 0.00581 |
|         | 20858 | A_09_P022531 | 6.11332  | -2.36610 | 1.083E-04 | 0.00943 |
|         | 12087 | A_09_P022531 | 5.91393  | -2.22335 | 1.226E-04 | 0.00998 |
|         | 36112 | A_09_P022531 | 5.97827  | -2.11446 | 4.013E-05 | 0.00750 |
|         | 16017 | A_09_P022531 | 5.93577  | -2.01648 | 1.930E-04 | 0.01170 |
|         | 33318 | A_09_P022531 | 5.94570  | -1.99696 | 8.610E-05 | 0.00882 |
| CG15482 | 36816 | A_09_P022481 | 5.77694  | -0.96544 | 4.036E-03 | 0.04642 |
| CG15533 | 41121 | A_09_P061361 | 5.37895  | -0.75658 | 3.701E-03 | 0.04460 |
| CG15643 | 31545 | A_09_P039021 | 4.97022  | -0.71847 | 4.458E-03 | 0.04879 |
| CG15658 | 10894 | A_09_P026011 | 6.45706  | -1.10718 | 1.516E-03 | 0.02997 |
|         | 41168 | A_09_P026011 | 6.36525  | -1.05859 | 2.208E-03 | 0.03590 |
| CG1571  | 8202  | A_09_P068076 | 10.48036 | -0.79924 | 2.572E-03 | 0.03783 |
| CG1572  | 1540  | A_09_P037751 | 8.95114  | -1.20352 | 2.497E-03 | 0.03735 |
| CG1600  | 7214  | A_09_P024801 | 8.92088  | -1.09944 | 1.291E-03 | 0.02752 |
| CG16791 | 17496 | A_09_P175930 | 10.06165 | -0.89426 | 1.618E-03 | 0.03094 |
| CG16820 | 14725 | A_09_P022541 | 3.77880  | -1.64269 | 8.811E-05 | 0.00890 |
| CG16996 | 10917 | A_09_P022216 | 7.90635  | -1.32646 | 1.789E-04 | 0.01142 |
|         | 33398 | A_09_P022216 | 7.58347  | -1.13763 | 4.133E-04 | 0.01571 |
| CG16997 | 6486  | A_09_P022221 | 7.55631  | -0.78259 | 4.462E-03 | 0.04880 |
| CG17150 | 32906 | A_09_P047421 | 6.74510  | -1.23895 | 4.592E-04 | 0.01661 |
| CG17154 | 32722 | A_09_P055261 | 7.49625  | -1.11070 | 1.350E-03 | 0.02822 |
| CG17181 | 12550 | A_09_P214545 | 6.39960  | -1.05986 | 9.761E-04 | 0.02401 |
|         | 31575 | A_09_P028011 | 8.27407  | -1.05239 | 4.137E-03 | 0.04695 |
| CG17211 | 11391 | A_09_P022226 | 7.54212  | -2.03247 | 3.810E-03 | 0.04491 |
|         | 16398 | A_09_P022226 | 7.31462  | -1.92062 | 3.976E-03 | 0.04606 |
| CG17278 | 34660 | A_09_P202905 | 10.73173 | -2.34331 | 4.278E-05 | 0.00750 |
|         | 10810 | A_09_P057171 | 11.29221 | -1.48129 | 5.790E-04 | 0.01853 |
| CG17290 | 19108 | A_09_P008631 | 4.23147  | -2.25547 | 1.591E-03 | 0.03065 |
| CG17321 | 13542 | A_09_P023256 | 4.66238  | -0.81730 | 2.597E-03 | 0.03797 |
| CG17323 | 38180 | A_09_P023241 | 7.57436  | -1.28173 | 2.804E-03 | 0.03929 |
| CG17574 | 17747 | A_09_P007071 | 5.78798  | -0.83861 | 2.268E-03 | 0.03604 |
| CG17662 | 26073 | A_09_P027016 | 4.99883  | -1.01295 | 2.685E-03 | 0.03830 |
| CG18157 | 30314 | A_09_P149032 | 9.24886  | -1.00228 | 1.220E-03 | 0.02683 |
| CG18301 | 5368  | A_09_P021666 | 4.78084  | -1.51420 | 4.227E-03 | 0.04735 |
| CG18304 | 4028  | A_09_P202205 | 10.87457 | -0.85714 | 3.647E-03 | 0.04434 |
| CG18313 | 37426 | A_09_P038665 | 8.20416  | -2.18996 | 1.587E-05 | 0.00614 |
|         | 33393 | A_09_P038665 | 8.03757  | -2.07557 | 2.663E-05 | 0.00686 |
| CG18542 | 9518  | A_09_P133175 | 9.18629  | -0.81984 | 3.568E-03 | 0.04369 |
| CG18547 | 33263 | A_09_P074101 | 10.19940 | -1.24606 | 9.243E-04 | 0.02338 |
|         | 26127 | A_09_P074101 | 10.10446 | -1.06847 | 1.021E-03 | 0.02450 |
| CG18585 | 11641 | A_09_P020416 | 3.02224  | -1.14297 | 3.326E-03 | 0.04235 |
| CG1909  | 31966 | A_09_P061886 | 7.05340  | -1.14551 | 1.756E-03 | 0.03205 |
|         | 21982 | A_09_P061886 | 7.01136  | -1.03204 | 2.854E-03 | 0.03956 |
| CG2016  | 25799 | A_09_P187190 | 8.53049  | -1.45824 | 3.264E-03 | 0.04201 |

|         |       |              |          |          |           |         |
|---------|-------|--------------|----------|----------|-----------|---------|
| CG2022  | 22928 | A_09_P036201 | 7.57262  | -1.03372 | 2.056E-03 | 0.03460 |
|         | 43339 | A_09_P036201 | 7.42693  | -0.95964 | 4.444E-03 | 0.04873 |
| CG2556  | 20922 | A_09_P038101 | 8.90481  | -0.81244 | 3.230E-03 | 0.04180 |
| CG2901  | 44064 | A_09_P101370 | 5.44263  | -1.21216 | 1.350E-03 | 0.02822 |
|         | 34676 | A_09_P066891 | 5.96112  | -1.06555 | 1.900E-03 | 0.03334 |
| CG30039 | 12884 | A_09_P057411 | 3.92591  | -0.94765 | 1.251E-03 | 0.02712 |
|         | 26707 | A_09_P057411 | 3.79642  | -0.85197 | 2.669E-03 | 0.03830 |
| CG30093 | 8454  | A_09_P057611 | 7.11790  | -0.88791 | 2.453E-03 | 0.03690 |
| CG30104 | 8593  | A_09_P057656 | 3.39809  | -0.73907 | 4.656E-03 | 0.04989 |
| CG30287 | 545   | A_09_P058041 | 7.01228  | -0.99944 | 3.309E-03 | 0.04224 |
| CG30345 | 37110 | A_09_P111075 | 9.15479  | -1.46146 | 2.547E-04 | 0.01286 |
| CG3097  | 42288 | A_09_P067346 | 11.31937 | -1.16121 | 7.955E-04 | 0.02163 |
| CG31104 | 36783 | A_09_P059011 | 3.28151  | -1.56943 | 2.095E-04 | 0.01192 |
| CG31106 | 5662  | A_09_P059021 | 6.92299  | -0.78996 | 3.742E-03 | 0.04464 |
| CG31140 | 18699 | A_09_P204740 | 7.78094  | -1.42397 | 2.833E-03 | 0.03947 |
| CG31221 | 10747 | A_09_P045496 | 3.65768  | -2.11973 | 2.784E-03 | 0.03911 |
| CG31300 | 11284 | A_09_P059556 | 2.53160  | -1.19206 | 2.477E-03 | 0.03717 |
| CG31475 | 2387  | A_09_P059956 | 7.93811  | -1.42974 | 1.058E-03 | 0.02496 |
|         | 5617  | A_09_P059956 | 8.15720  | -1.36659 | 7.783E-04 | 0.02136 |
| CG31522 | 40582 | A_09_P109805 | 6.43843  | -1.19273 | 4.771E-04 | 0.01682 |
| CG31642 | 2819  | A_09_P060306 | 10.07376 | -2.07086 | 2.372E-04 | 0.01260 |
|         | 8249  | A_09_P060306 | 10.21858 | -2.06184 | 2.004E-04 | 0.01178 |
| CG31742 | 16440 | A_09_P013601 | 9.12631  | -1.06346 | 3.068E-03 | 0.04082 |
|         | 27401 | A_09_P013601 | 8.97583  | -1.00085 | 3.782E-03 | 0.04477 |
| CG31776 | 12918 | A_09_P201415 | 7.69638  | -1.50016 | 4.084E-04 | 0.01566 |
|         | 40728 | A_09_P013676 | 7.03093  | -1.15141 | 6.531E-04 | 0.01965 |
| CG31788 | 38916 | A_09_P013726 | 3.89536  | -1.47953 | 1.198E-03 | 0.02659 |
| CG31816 | 31152 | A_09_P166205 | 7.65514  | -1.56049 | 3.956E-04 | 0.01544 |
|         | 884   | A_09_P013826 | 6.08085  | -1.42332 | 1.483E-04 | 0.01048 |
| CG31909 | 30527 | A_09_P014086 | 2.45035  | -1.57611 | 3.295E-04 | 0.01448 |
| CG31997 | 8996  | A_09_P014251 | 9.16790  | -1.31963 | 5.314E-04 | 0.01772 |
|         | 12018 | A_09_P014251 | 9.23698  | -1.31162 | 5.620E-04 | 0.01829 |
|         | 3716  | A_09_P193045 | 10.41241 | -1.25567 | 2.411E-04 | 0.01261 |
| CG32006 | 1914  | A_09_P014276 | 6.48946  | -1.00509 | 9.632E-04 | 0.02394 |
|         | 26464 | A_09_P014276 | 6.64728  | -0.87563 | 1.626E-03 | 0.03104 |
| CG32237 | 19066 | A_09_P015011 | 3.26892  | -1.23172 | 4.283E-03 | 0.04770 |
| CG32264 | 20465 | A_09_P185580 | 4.48117  | -1.15662 | 1.568E-03 | 0.03039 |
|         | 33561 | A_09_P193010 | 8.88373  | -0.85156 | 2.446E-03 | 0.03690 |
| CG32354 | 36996 | A_09_P015331 | 9.16963  | -1.66304 | 1.075E-04 | 0.00943 |
|         | 19936 | A_09_P015331 | 9.18001  | -1.53802 | 1.433E-04 | 0.01046 |
| CG32459 | 21120 | A_09_P015616 | 6.81844  | -0.92231 | 3.702E-03 | 0.04460 |
|         | 34270 | A_09_P015616 | 6.93583  | -0.90210 | 3.551E-03 | 0.04356 |
| CG32588 | 36146 | A_09_P015926 | 4.82207  | -2.25863 | 1.938E-03 | 0.03363 |
|         | 6272  | A_09_P015926 | 4.79049  | -1.97860 | 8.872E-05 | 0.00892 |
| CG32638 | 25989 | A_09_P016031 | 11.55956 | -1.11399 | 4.733E-04 | 0.01674 |
|         | 20854 | A_09_P016031 | 11.59665 | -0.93186 | 1.345E-03 | 0.02822 |
| CG32695 | 18797 | A_09_P016251 | 3.41164  | -1.96537 | 4.906E-05 | 0.00755 |
| CG33109 | 9307  | A_09_P016836 | 3.95428  | -1.35550 | 6.924E-04 | 0.02015 |
| CG33128 | 10590 | A_09_P215430 | 7.29777  | -1.29868 | 2.388E-04 | 0.01261 |
|         | 19429 | A_09_P016901 | 7.16983  | -1.20880 | 4.478E-04 | 0.01634 |
| CG33144 | 14266 | A_09_P139565 | 8.86723  | -1.07697 | 7.626E-04 | 0.02115 |
|         | 39779 | A_09_P016941 | 8.94041  | -1.06625 | 1.962E-03 | 0.03387 |
|         | 37325 | A_09_P016941 | 9.06182  | -1.03446 | 1.369E-03 | 0.02826 |
| CG33233 | 4421  | A_09_P108210 | 6.27114  | -1.20818 | 9.978E-04 | 0.02427 |
| CG33285 | 42082 | A_09_P017411 | 7.03771  | -1.79491 | 1.634E-03 | 0.03106 |
|         | 5293  | A_09_P017411 | 7.11590  | -1.69512 | 1.568E-03 | 0.03039 |
| CG33287 | 28482 | A_09_P017421 | 4.04472  | -0.90321 | 2.689E-03 | 0.03830 |
| CG33474 | 34212 | A_09_P017661 | 8.28311  | -1.17208 | 7.680E-04 | 0.02118 |
| CG33798 | 44926 | A_09_P000671 | 5.72773  | -1.44957 | 2.790E-04 | 0.01335 |
|         | 42305 | A_09_P000671 | 5.69108  | -1.28028 | 1.201E-03 | 0.02660 |
| CG33912 | 17407 | A_09_P000786 | 6.75927  | -0.93891 | 2.554E-03 | 0.03772 |
|         | 25225 | A_09_P000786 | 6.81028  | -0.80207 | 4.626E-03 | 0.04972 |
| CG34107 | 2066  | A_09_P002511 | 4.40017  | -0.84222 | 2.796E-03 | 0.03921 |
| CG34114 | 11698 | A_09_P129855 | 7.97506  | -1.32058 | 2.629E-03 | 0.03809 |
| CG34160 | 22670 | A_09_P002986 | 6.08654  | -1.15298 | 4.699E-03 | 0.04995 |

|         |       |              |          |          |           |         |
|---------|-------|--------------|----------|----------|-----------|---------|
| CG34215 | 36962 | A_09_P003246 | 4.42359  | -2.42234 | 3.923E-05 | 0.00750 |
|         | 7424  | A_09_P003246 | 4.69399  | -2.09060 | 2.275E-04 | 0.01245 |
| CG34222 | 36102 | A_09_P003281 | 9.43837  | -1.39629 | 1.741E-03 | 0.03202 |
| CG34232 | 12374 | A_09_P100320 | 10.51052 | -1.19136 | 2.653E-03 | 0.03825 |
| CG34290 | 44472 | A_09_P003621 | 9.53372  | -1.23701 | 7.641E-04 | 0.02115 |
|         | 21216 | A_09_P003621 | 9.60610  | -1.15345 | 9.886E-04 | 0.02417 |
| CG34383 | 36656 | A_09_P206085 | 12.97102 | -1.45007 | 3.475E-04 | 0.01459 |
|         | 11257 | A_09_P171405 | 10.65921 | -1.23467 | 7.538E-04 | 0.02104 |
|         | 30729 | A_09_P129800 | 9.71070  | -0.95036 | 1.443E-03 | 0.02913 |
|         | 18761 | A_09_P004086 | 11.25712 | -0.92454 | 1.196E-03 | 0.02657 |
| CG34432 | 15365 | A_09_P004421 | 6.97207  | -0.99042 | 4.700E-03 | 0.04995 |
| CG3624  | 33714 | A_09_P026441 | 7.49858  | -1.31288 | 8.976E-04 | 0.02299 |
|         | 18220 | A_09_P026441 | 7.46568  | -1.13742 | 2.378E-03 | 0.03662 |
|         | 43123 | A_09_P206660 | 10.29931 | -0.79646 | 3.439E-03 | 0.04292 |
| CG3835  | 27514 | A_09_P076456 | 7.32957  | -3.09223 | 1.239E-05 | 0.00601 |
|         | 37933 | A_09_P076456 | 7.23064  | -3.00266 | 4.916E-06 | 0.00581 |
| CG3842  | 30715 | A_09_P067601 | 7.45931  | -0.87455 | 2.553E-03 | 0.03772 |
| CG3927  | 32685 | A_09_P026516 | 5.15553  | -1.57561 | 8.621E-04 | 0.02258 |
| CG40178 | 20982 | A_09_P171490 | 7.70637  | -1.11497 | 3.072E-03 | 0.04082 |
| CG4115  | 9645  | A_09_P074276 | 7.73587  | -1.51337 | 6.467E-04 | 0.01958 |
| CG41423 | 16283 | A_09_P005291 | 7.27808  | -0.98881 | 3.234E-03 | 0.04180 |
| CG4164  | 34306 | A_09_P017961 | 13.37762 | -0.87213 | 3.728E-03 | 0.04464 |
| CG42237 | 45084 | A_09_P044326 | 9.51758  | -1.01012 | 1.135E-03 | 0.02587 |
| CG42256 | 21099 | A_09_P015411 | 5.90517  | -1.18851 | 1.708E-03 | 0.03195 |
|         | 41766 | A_09_P048051 | 6.16379  | -1.03324 | 2.994E-03 | 0.04025 |
| CG42347 | 5809  | A_09_P057306 | 7.76294  | -0.75108 | 4.709E-03 | 0.04999 |
| CG42358 | 17005 | A_09_P069126 | 12.56494 | -1.86633 | 4.122E-05 | 0.00750 |
|         | 20366 | A_09_P069126 | 12.44052 | -1.78543 | 3.691E-05 | 0.00750 |
| CG42394 | 4803  | A_09_P186280 | 9.50546  | -1.13739 | 2.030E-03 | 0.03438 |
| CG42450 | 43315 | A_09_P221790 | 5.55569  | -1.26411 | 1.462E-03 | 0.02926 |
|         | 9132  | A_09_P015786 | 9.10146  | -1.15463 | 3.232E-03 | 0.04180 |
|         | 22596 | A_09_P015786 | 9.02550  | -1.05145 | 2.261E-03 | 0.03604 |
| CG42663 | 904   | A_09_P209265 | 9.03775  | -1.16545 | 1.237E-03 | 0.02702 |
| CG42671 | 15040 | A_09_P054886 | 8.09601  | -0.95968 | 3.979E-03 | 0.04606 |
| CG4271  | 5560  | A_09_P018501 | 4.78274  | -0.73721 | 3.775E-03 | 0.04475 |
| CG42732 | 15478 | A_09_P003971 | 9.66966  | -2.22223 | 4.426E-04 | 0.01632 |
| CG43143 | 20818 | A_09_P090275 | 11.08602 | -0.87209 | 2.265E-03 | 0.03604 |
| CG43340 | 22520 | A_09_P079786 | 5.10573  | -0.99475 | 1.597E-03 | 0.03074 |
|         | 32131 | A_09_P079786 | 5.07933  | -0.93347 | 1.933E-03 | 0.03360 |
| CG43638 | 11226 | A_09_P206605 | 5.26910  | -0.99437 | 1.734E-03 | 0.03202 |
| CG43737 | 32578 | A_09_P038886 | 9.27642  | -1.20893 | 3.027E-03 | 0.04053 |
|         | 42012 | A_09_P038886 | 9.14824  | -1.15915 | 3.201E-03 | 0.04161 |
| CG4434  | 42065 | A_09_P070616 | 5.78437  | -0.91098 | 3.088E-03 | 0.04092 |
| CG4455  | 41762 | A_09_P065241 | 9.31585  | -1.10018 | 2.598E-03 | 0.03797 |
| CG44596 | 9750  | A_09_P073651 | 9.34207  | -0.98031 | 1.107E-03 | 0.02556 |
|         | 6542  | A_09_P073651 | 9.23686  | -0.83832 | 2.502E-03 | 0.03741 |
| CG4597  | 16890 | A_09_P052901 | 5.81805  | -1.43717 | 8.302E-04 | 0.02206 |
| CG4607  | 34226 | A_09_P141515 | 6.69376  | -1.51829 | 1.090E-03 | 0.02539 |
| CG4680  | 38040 | A_09_P033651 | 8.06394  | -1.75738 | 4.712E-04 | 0.01673 |
| CG4683  | 4085  | A_09_P129860 | 6.32553  | -1.41313 | 3.212E-03 | 0.04167 |
|         | 10996 | A_09_P073681 | 9.26201  | -1.13185 | 1.780E-03 | 0.03209 |
| CG4688  | 22304 | A_09_P151205 | 5.05050  | -1.41790 | 1.576E-03 | 0.03048 |
| CG4757  | 35510 | A_09_P079686 | 4.02167  | -2.93886 | 1.009E-04 | 0.00935 |
|         | 7242  | A_09_P079686 | 4.16624  | -2.85781 | 3.189E-04 | 0.01437 |
| CG5048  | 31037 | A_09_P055966 | 4.24077  | -1.48341 | 1.057E-04 | 0.00943 |
|         | 28864 | A_09_P164790 | 6.99174  | -1.47525 | 6.214E-04 | 0.01915 |
|         | 25199 | A_09_P055966 | 4.50397  | -1.25220 | 1.482E-03 | 0.02955 |
| CG5050  | 3016  | A_09_P022941 | 9.39803  | -0.97444 | 1.133E-03 | 0.02584 |
|         | 18650 | A_09_P022941 | 9.46575  | -0.91569 | 1.760E-03 | 0.03209 |
| CG5059  | 38442 | A_09_P035161 | 10.23013 | -1.19614 | 5.001E-04 | 0.01710 |
| CG5075  | 32769 | A_09_P022396 | 7.14078  | -1.10470 | 1.721E-03 | 0.03196 |
|         | 15288 | A_09_P022396 | 7.09955  | -1.02166 | 2.686E-03 | 0.03830 |
|         | 35486 | A_09_P022396 | 7.09196  | -1.01163 | 2.587E-03 | 0.03794 |
|         | 40830 | A_09_P022396 | 7.03037  | -1.01014 | 2.099E-03 | 0.03496 |
|         | 42702 | A_09_P022396 | 6.89134  | -0.96561 | 4.006E-03 | 0.04631 |

|        |       |              |          |          |           |         |
|--------|-------|--------------|----------|----------|-----------|---------|
|        | 25411 | A_09_P022396 | 6.93488  | -0.94171 | 2.565E-03 | 0.03781 |
|        | 32887 | A_09_P022396 | 6.90839  | -0.93666 | 4.684E-03 | 0.04995 |
|        | 30426 | A_09_P022396 | 6.91346  | -0.92610 | 3.677E-03 | 0.04451 |
| CG5322 | 8155  | A_09_P021626 | 7.97654  | -1.16767 | 4.204E-04 | 0.01584 |
|        | 41703 | A_09_P021626 | 7.55067  | -1.10449 | 9.271E-04 | 0.02341 |
|        | 18066 | A_09_P111230 | 7.41450  | -1.05653 | 6.104E-04 | 0.01907 |
| CG5342 | 3283  | A_09_P134465 | 6.78084  | -1.38364 | 1.930E-04 | 0.01170 |
|        | 2543  | A_09_P073886 | 8.70756  | -1.07623 | 8.661E-04 | 0.02262 |
|        | 4272  | A_09_P073886 | 8.84696  | -0.85735 | 3.333E-03 | 0.04237 |
| CG5455 | 8374  | A_09_P071986 | 8.53231  | -1.10631 | 1.747E-03 | 0.03204 |
|        | 7792  | A_09_P071986 | 8.55947  | -1.05725 | 1.366E-03 | 0.02826 |
| CG5614 | 1637  | A_09_P142075 | 6.51151  | -0.89529 | 2.646E-03 | 0.03821 |
|        | 17213 | A_09_P075561 | 7.00677  | -0.82004 | 2.807E-03 | 0.03929 |
| CG5707 | 19040 | A_09_P078761 | 6.66691  | -1.09819 | 3.781E-03 | 0.04477 |
|        | 17610 | A_09_P078761 | 6.52789  | -1.02914 | 3.282E-03 | 0.04205 |
| CG5715 | 4329  | A_09_P218095 | 10.66398 | -0.72497 | 4.325E-03 | 0.04794 |
| CG5731 | 38939 | A_09_P021376 | 10.01650 | -0.83252 | 2.101E-03 | 0.03496 |
| CG5804 | 23581 | A_09_P054086 | 6.77334  | -1.40739 | 1.148E-03 | 0.02604 |
|        | 15548 | A_09_P054086 | 6.61347  | -1.32381 | 2.261E-03 | 0.03604 |
| CG5835 | 35390 | A_09_P069116 | 9.40840  | -1.14149 | 5.696E-04 | 0.01842 |
|        | 23378 | A_09_P069106 | 9.56816  | -1.12758 | 4.321E-04 | 0.01609 |
| CG5869 | 13602 | A_09_P065986 | 10.88148 | -0.77496 | 3.728E-03 | 0.04464 |
|        | 6974  | A_09_P065986 | 10.78863 | -0.75689 | 3.959E-03 | 0.04591 |
| CG5945 | 26576 | A_09_P022536 | 7.05751  | -1.19096 | 3.411E-04 | 0.01453 |
| CG6024 | 781   | A_09_P055081 | 9.59676  | -2.30837 | 2.969E-04 | 0.01375 |
| CG6045 | 6034  | A_09_P075516 | 9.43531  | -1.22642 | 1.744E-03 | 0.03203 |
|        | 21393 | A_09_P075516 | 9.43078  | -1.15387 | 1.541E-03 | 0.03025 |
| CG6206 | 37642 | A_09_P079826 | 10.30962 | -1.51895 | 1.020E-03 | 0.02450 |
| CG6231 | 9422  | A_09_P148150 | 3.95043  | -1.33263 | 1.515E-03 | 0.02997 |
| CG6272 | 29318 | A_09_P054796 | 8.63650  | -1.11754 | 8.827E-04 | 0.02279 |
|        | 40219 | A_09_P054796 | 8.76674  | -1.09382 | 8.117E-04 | 0.02178 |
| CG6329 | 37001 | A_09_P007421 | 5.65126  | -0.92023 | 2.246E-03 | 0.03604 |
|        | 6315  | A_09_P007421 | 5.53222  | -0.79496 | 4.481E-03 | 0.04890 |
| CG6330 | 2632  | A_09_P072126 | 5.81628  | -2.94164 | 1.874E-04 | 0.01160 |
|        | 19820 | A_09_P072126 | 5.79005  | -2.82792 | 1.677E-04 | 0.01111 |
| CG6356 | 8838  | A_09_P071031 | 5.38039  | -1.20847 | 3.272E-04 | 0.01446 |
|        | 43638 | A_09_P071031 | 5.28351  | -0.97693 | 1.322E-03 | 0.02790 |
| CG6357 | 20211 | A_09_P124315 | 7.66606  | -1.60628 | 8.184E-05 | 0.00873 |
|        | 30297 | A_09_P007441 | 8.58483  | -1.58770 | 6.727E-05 | 0.00827 |
|        | 37307 | A_09_P007441 | 8.48507  | -1.57581 | 9.007E-05 | 0.00899 |
| CG6520 | 6972  | A_09_P008696 | 3.25629  | -1.18898 | 3.411E-03 | 0.04275 |
|        | 11212 | A_09_P008696 | 3.78139  | -0.73978 | 3.931E-03 | 0.04582 |
| CG6790 | 19859 | A_09_P073881 | 7.73978  | -1.34524 | 7.798E-04 | 0.02136 |
| CG6996 | 23466 | A_09_P034941 | 7.23967  | -1.25963 | 5.976E-04 | 0.01885 |
|        | 24591 | A_09_P034941 | 7.24482  | -1.22653 | 6.875E-04 | 0.02009 |
| CG7017 | 6654  | A_09_P034946 | 3.15423  | -1.28450 | 7.564E-04 | 0.02107 |
| CG7407 | 4134  | A_09_P035646 | 8.26116  | -0.86729 | 2.491E-03 | 0.03729 |
| CG7560 | 10775 | A_09_P054921 | 4.16523  | -1.23879 | 4.980E-04 | 0.01707 |
| CG7884 | 5576  | A_09_P040416 | 6.48760  | -1.96175 | 6.939E-04 | 0.02015 |
|        | 12776 | A_09_P040416 | 6.41856  | -1.94209 | 2.912E-04 | 0.01362 |
| CG7900 | 5851  | A_09_P217635 | 12.54812 | -0.88520 | 4.090E-03 | 0.04669 |
| CG7991 | 19870 | A_09_P119080 | 6.44297  | -1.52088 | 2.094E-04 | 0.01192 |
| CG8369 | 32823 | A_09_P063141 | 9.53533  | -0.76466 | 3.801E-03 | 0.04484 |
| CG8398 | 28214 | A_09_P053301 | 5.59373  | -1.02800 | 3.202E-03 | 0.04161 |
| CG8420 | 10223 | A_09_P072891 | 8.66906  | -2.84710 | 2.453E-05 | 0.00683 |
|        | 44215 | A_09_P072891 | 8.40863  | -2.83510 | 3.853E-05 | 0.00750 |
| CG8620 | 19614 | A_09_P063686 | 6.59863  | -1.35733 | 2.476E-04 | 0.01274 |
| CG8740 | 14897 | A_09_P079691 | 4.55007  | -2.31277 | 2.788E-03 | 0.03914 |
| CG9084 | 34042 | A_09_P006306 | 8.45401  | -1.67917 | 5.808E-05 | 0.00798 |
| CG9095 | 1736  | A_09_P038876 | 5.19199  | -1.40900 | 2.740E-04 | 0.01328 |
|        | 37056 | A_09_P038876 | 5.39060  | -0.99779 | 3.425E-03 | 0.04283 |
| CG9175 | 12091 | A_09_P019866 | 8.37773  | -0.85479 | 2.359E-03 | 0.03643 |
|        | 25357 | A_09_P019866 | 8.22191  | -0.82138 | 2.160E-03 | 0.03546 |
| CG9232 | 29737 | A_09_P020086 | 5.87407  | -2.05064 | 7.751E-04 | 0.02134 |
| CG9297 | 41692 | A_09_P194255 | 5.79180  | -1.36935 | 3.470E-04 | 0.01459 |

|         |       |              |          |          |           |         |
|---------|-------|--------------|----------|----------|-----------|---------|
| CG9312  | 17314 | A_09_P074856 | 6.24054  | -1.37527 | 4.017E-03 | 0.04634 |
| CG9426  | 23469 | A_09_P022491 | 11.51114 | -0.76252 | 3.129E-03 | 0.04112 |
|         | 30924 | A_09_P022491 | 11.38720 | -0.75452 | 3.384E-03 | 0.04260 |
| CG9445  | 5094  | A_09_P063346 | 7.74214  | -3.43625 | 1.353E-06 | 0.00581 |
| CG9449  | 36111 | A_09_P034606 | 5.01069  | -2.17504 | 4.266E-03 | 0.04763 |
|         | 34075 | A_09_P034606 | 4.49801  | -1.90978 | 1.768E-03 | 0.03209 |
| CG9664  | 41677 | A_09_P018906 | 5.07724  | -1.26114 | 5.024E-04 | 0.01714 |
|         | 5327  | A_09_P018906 | 5.05429  | -0.88981 | 2.249E-03 | 0.03604 |
| CG9812  | 19688 | A_09_P026921 | 3.27147  | -1.23441 | 3.678E-04 | 0.01479 |
| CG9894  | 43374 | A_09_P221985 | 9.70659  | -1.19585 | 8.467E-04 | 0.02233 |
|         | 30216 | A_09_P174270 | 11.58781 | -1.07092 | 2.568E-03 | 0.03783 |
| Chd64   | 12726 | A_09_P029301 | 12.80236 | -0.77317 | 4.598E-03 | 0.04962 |
| CheA29a | 10664 | A_09_P017071 | 6.15368  | -0.79957 | 3.316E-03 | 0.04231 |
| CheA87a | 19304 | A_09_P074716 | 4.55191  | -0.99457 | 2.685E-03 | 0.03830 |
| cib     | 43888 | A_09_P078106 | 13.85459 | -1.08245 | 7.755E-04 | 0.02134 |
|         | 28795 | A_09_P078106 | 13.86793 | -1.03783 | 1.207E-03 | 0.02665 |
|         | 30843 | A_09_P078106 | 13.78717 | -1.02372 | 1.312E-03 | 0.02772 |
|         | 13015 | A_09_P078106 | 14.00194 | -1.01303 | 1.174E-03 | 0.02639 |
|         | 4534  | A_09_P078106 | 13.94007 | -0.99120 | 1.452E-03 | 0.02919 |
|         | 16279 | A_09_P078106 | 14.04834 | -0.98940 | 1.542E-03 | 0.03025 |
|         | 28585 | A_09_P078106 | 13.89433 | -0.98472 | 1.201E-03 | 0.02660 |
|         | 30477 | A_09_P078106 | 13.89919 | -0.97991 | 1.257E-03 | 0.02712 |
|         | 23224 | A_09_P078106 | 13.91612 | -0.97378 | 1.371E-03 | 0.02826 |
|         | 17034 | A_09_P078106 | 14.01375 | -0.91357 | 1.566E-03 | 0.03039 |
| cola    | 460   | A_09_P130330 | 3.20483  | -1.13964 | 4.609E-03 | 0.04967 |
| cora    | 38106 | A_09_P012506 | 6.50551  | -0.91436 | 2.602E-03 | 0.03798 |
| epo     | 38544 | A_09_P041801 | 9.07576  | -1.04114 | 1.361E-03 | 0.02826 |
|         | 5238  | A_09_P225995 | 9.48040  | -0.87310 | 3.069E-03 | 0.04082 |
| epx     | 43734 | A_09_P064316 | 3.54707  | -1.01397 | 2.377E-03 | 0.03661 |
|         | 12609 | A_09_P182675 | 7.33545  | -0.91962 | 3.798E-03 | 0.04483 |
|         | 20944 | A_09_P193225 | 9.66432  | -0.88348 | 1.633E-03 | 0.03106 |
|         | 36183 | A_09_P225125 | 4.05713  | -0.70904 | 4.618E-03 | 0.04971 |
| Crg-1   | 9015  | A_09_P140588 | 10.82069 | -0.99675 | 1.093E-03 | 0.02544 |
| erol    | 7457  | A_09_P032231 | 11.14958 | -1.30207 | 5.938E-04 | 0.01879 |
|         | 14488 | A_09_P032231 | 11.18950 | -1.24591 | 2.099E-03 | 0.03496 |
|         | 35355 | A_09_P050396 | 10.42314 | -1.17333 | 6.420E-04 | 0.01949 |
|         | 41556 | A_09_P180365 | 15.21540 | -1.08601 | 1.641E-03 | 0.03107 |
| d       | 37465 | A_09_P179220 | 9.32112  | -1.16751 | 1.077E-03 | 0.02524 |
|         | 21042 | A_09_P041896 | 6.52121  | -1.02931 | 1.345E-03 | 0.02822 |
| dally   | 18003 | A_09_P013216 | 5.01806  | -1.46874 | 1.240E-03 | 0.02703 |
| Dap160  | 10696 | A_09_P209195 | 7.76448  | -0.97650 | 4.075E-03 | 0.04661 |
| daw     | 16336 | A_09_P018706 | 2.96515  | -1.18691 | 6.188E-04 | 0.01910 |
|         | 35100 | A_09_P018706 | 3.18207  | -0.74905 | 3.695E-03 | 0.04459 |
| Dgp-1   | 14582 | A_09_P079961 | 11.27737 | -0.90779 | 3.536E-03 | 0.04348 |
|         | 36824 | A_09_P079961 | 10.98864 | -0.90741 | 2.294E-03 | 0.03628 |
| Dh44-R1 | 2079  | A_09_P007661 | 5.25401  | -1.06786 | 1.196E-03 | 0.02657 |
| dib     | 2189  | A_09_P141385 | 6.66409  | -0.89715 | 2.265E-03 | 0.03604 |
| dnr1    | 6521  | A_09_P026511 | 5.95545  | -0.78512 | 4.513E-03 | 0.04910 |
| Dok     | 837   | A_09_P189630 | 11.26567 | -1.03935 | 2.844E-03 | 0.03952 |
|         | 17607 | A_09_P067886 | 10.99733 | -0.86782 | 2.452E-03 | 0.03690 |
| drl     | 37836 | A_09_P030801 | 9.48546  | -0.80067 | 4.256E-03 | 0.04757 |
| dronngo | 6441  | A_09_P032206 | 12.93729 | -0.77992 | 4.454E-03 | 0.04877 |
| Drs     | 30832 | A_09_P012336 | 8.27183  | -0.96078 | 4.541E-03 | 0.04929 |
| dtr     | 23006 | A_09_P033201 | 7.05329  | -0.81181 | 2.383E-03 | 0.03664 |
|         | 23357 | A_09_P033201 | 7.03406  | -0.80001 | 2.927E-03 | 0.03999 |
| Dys     | 7035  | A_09_P045866 | 8.86648  | -1.95607 | 1.813E-04 | 0.01142 |
|         | 8007  | A_09_P091350 | 8.09953  | -1.11928 | 6.508E-04 | 0.01965 |
| east    | 36404 | A_09_P222800 | 9.93318  | -0.82350 | 4.174E-03 | 0.04708 |
| ec      | 44056 | A_09_P042136 | 8.49828  | -1.33940 | 3.785E-04 | 0.01508 |
|         | 2214  | A_09_P170860 | 8.81721  | -1.19325 | 8.964E-04 | 0.02299 |
| EcR     | 699   | A_09_P206975 | 4.10534  | -2.03116 | 4.310E-05 | 0.00750 |
|         | 6362  | A_09_P051976 | 8.48822  | -1.69970 | 3.278E-04 | 0.01446 |
|         | 4982  | A_09_P042146 | 7.08126  | -1.63556 | 1.450E-04 | 0.01046 |
|         | 2439  | A_09_P042146 | 7.04805  | -1.57903 | 1.579E-04 | 0.01142 |
|         | 21290 | A_09_P050511 | 7.42977  | -1.45707 | 4.218E-04 | 0.01586 |

|            |       |              |          |          |           |         |
|------------|-------|--------------|----------|----------|-----------|---------|
| Ect4       | 11376 | A_09_P004026 | 11.82402 | -0.86015 | 1.719E-03 | 0.03196 |
|            | 22472 | A_09_P143935 | 12.87628 | -0.79395 | 3.112E-03 | 0.04102 |
|            | 33776 | A_09_P217320 | 11.36259 | -0.77846 | 3.268E-03 | 0.04201 |
| Eig71Ei    | 24978 | A_09_P030366 | 3.79825  | -2.19402 | 1.756E-03 | 0.03205 |
| Eig71Ek    | 19788 | A_09_P030376 | 4.06663  | -2.68353 | 5.884E-04 | 0.01866 |
| Eip75B     | 18320 | A_09_P049541 | 6.42202  | -1.50403 | 3.436E-04 | 0.01453 |
| elav       | 32472 | A_09_P090750 | 9.11339  | -1.44977 | 1.356E-03 | 0.02826 |
|            | 43452 | A_09_P121080 | 9.90996  | -1.02710 | 1.180E-03 | 0.02646 |
|            | 21436 | A_09_P042226 | 10.98460 | -0.82425 | 3.665E-03 | 0.04449 |
| Eno        | 34863 | A_09_P188635 | 10.46326 | -0.74039 | 3.549E-03 | 0.04356 |
|            | 38188 | A_09_P042251 | 12.72395 | -0.92851 | 1.325E-03 | 0.02795 |
|            | 1214  | A_09_P042251 | 12.58621 | -0.88286 | 1.714E-03 | 0.03195 |
| esn        | 36969 | A_09_P134125 | 6.11439  | -2.07815 | 2.301E-03 | 0.03629 |
|            | 7685  | A_09_P065501 | 4.98600  | -1.91756 | 2.432E-04 | 0.01261 |
| Exn        | 24540 | A_09_P178980 | 5.08401  | -1.04695 | 2.330E-03 | 0.03641 |
|            | 13420 | A_09_P079726 | 7.05481  | -0.90132 | 1.911E-03 | 0.03340 |
| fax        | 37871 | A_09_P126520 | 11.23197 | -1.70837 | 9.115E-04 | 0.02326 |
|            | 6109  | A_09_P030211 | 10.92787 | -1.35096 | 1.088E-03 | 0.02536 |
|            | 23163 | A_09_P030211 | 10.91131 | -1.24386 | 1.070E-03 | 0.02516 |
| Fhos       | 13780 | A_09_P147645 | 11.28257 | -1.04752 | 2.102E-03 | 0.03496 |
|            | 43686 | A_09_P050171 | 11.82772 | -0.98311 | 1.778E-03 | 0.03209 |
|            | 13217 | A_09_P047936 | 10.31628 | -1.87114 | 9.713E-05 | 0.00921 |
| fj         | 27168 | A_09_P042371 | 7.50761  | -3.61694 | 2.872E-04 | 0.01353 |
|            | 9710  | A_09_P042371 | 7.61809  | -3.56434 | 2.477E-04 | 0.01274 |
|            | 20441 | A_09_P121565 | 7.42725  | -3.13010 | 2.594E-04 | 0.01293 |
| fng        | 5908  | A_09_P013246 | 6.35260  | -2.82643 | 9.971E-05 | 0.00934 |
|            | 6182  | A_09_P013246 | 6.21931  | -2.78101 | 2.044E-03 | 0.03447 |
| for        | 4490  | A_09_P042411 | 12.20350 | -0.99296 | 1.527E-03 | 0.03005 |
|            | 4302  | A_09_P042411 | 12.17670 | -0.93705 | 2.106E-03 | 0.03502 |
| fs(1)K10   | 13816 | A_09_P042426 | 13.06186 | -4.18982 | 2.717E-07 | 0.00355 |
|            | 27524 | A_09_P042426 | 12.71973 | -4.08884 | 2.874E-07 | 0.00355 |
| fz3        | 28100 | A_09_P079251 | 8.67381  | -1.24004 | 1.258E-03 | 0.02712 |
|            | 32287 | A_09_P199375 | 9.85372  | -0.94733 | 1.116E-03 | 0.02559 |
| G-salpa60A | 44066 | A_09_P042581 | 9.40379  | -1.06811 | 3.607E-03 | 0.04398 |
|            | 12451 | A_09_P042581 | 9.93966  | -1.02183 | 1.559E-03 | 0.03039 |
|            | 8655  | A_09_P196460 | 11.26004 | -0.78780 | 4.663E-03 | 0.04990 |
| GABA-B-R1  | 27944 | A_09_P187730 | 8.03808  | -0.81283 | 2.411E-03 | 0.03686 |
|            | 16459 | A_09_P122725 | 10.77362 | -1.64053 | 8.815E-05 | 0.00890 |
| galectin   | 20671 | A_09_P017791 | 10.84320 | -1.63510 | 1.982E-04 | 0.01176 |
|            | 15864 | A_09_P078086 | 5.12534  | -1.02314 | 8.965E-04 | 0.02299 |
| Gasp       | 44930 | A_09_P076726 | 8.61786  | -0.87591 | 1.791E-03 | 0.03218 |
|            | 37890 | A_09_P076726 | 8.70742  | -0.82408 | 2.300E-03 | 0.03628 |
| Gld2       | 10671 | A_09_P070091 | 12.36162 | -1.70886 | 8.726E-05 | 0.00888 |
|            | 27585 | A_09_P070091 | 11.94948 | -1.49842 | 1.060E-04 | 0.00943 |
| Gli        | 16331 | A_09_P043156 | 7.00300  | -1.53053 | 7.132E-04 | 0.02042 |
|            | 6738  | A_09_P043156 | 6.96633  | -1.51010 | 1.450E-03 | 0.02919 |
|            | 16041 | A_09_P144150 | 7.27389  | -1.12916 | 1.802E-03 | 0.03231 |
| gol        | 25769 | A_09_P146635 | 3.65548  | -1.33090 | 3.328E-03 | 0.04235 |
|            | 42537 | A_09_P011351 | 3.54985  | -1.28916 | 2.555E-03 | 0.03772 |
| Gp150      | 33169 | A_09_P116275 | 10.78072 | -0.76400 | 4.660E-03 | 0.04990 |
|            | 28300 | A_09_P029566 | 10.59030 | -0.75845 | 3.476E-03 | 0.04306 |
| Gr28b      | 461   | A_09_P056916 | 7.23797  | -1.56624 | 5.511E-04 | 0.01811 |
|            | 45007 | A_09_P056916 | 7.60469  | -1.41646 | 4.142E-04 | 0.01572 |
| Gr63a      | 31028 | A_09_P029176 | 10.98412 | -1.02875 | 2.777E-03 | 0.03906 |
|            | 42945 | A_09_P029176 | 10.81373 | -1.00455 | 3.550E-03 | 0.04356 |
| Gr89a      | 3346  | A_09_P075876 | 2.50834  | -0.94199 | 1.630E-03 | 0.03104 |
| Gr93a      | 17326 | A_09_P064141 | 8.31901  | -1.19553 | 5.164E-04 | 0.01748 |
| Gr93b      | 1808  | A_09_P064141 | 8.43489  | -1.02000 | 2.614E-03 | 0.03802 |
|            | 23739 | A_09_P056851 | 9.05567  | -1.48989 | 1.663E-03 | 0.03127 |
| Gr93c      | 34876 | A_09_P056851 | 9.09191  | -1.47505 | 2.118E-03 | 0.03510 |
|            | 34776 | A_09_P056846 | 6.55886  | -0.76206 | 3.515E-03 | 0.04333 |
| Gr93d      | 7087  | A_09_P056841 | 7.35028  | -1.24365 | 1.359E-03 | 0.02826 |
|            | 31432 | A_09_P056841 | 7.27420  | -1.16462 | 1.892E-03 | 0.03334 |
| GstD1      | 757   | A_09_P042646 | 11.58995 | -3.24550 | 9.493E-06 | 0.00581 |
|            | 27083 | A_09_P042646 | 11.54485 | -3.05871 | 7.737E-06 | 0.00581 |

|             |       |              |          |          |           |         |
|-------------|-------|--------------|----------|----------|-----------|---------|
| GstD10      | 24830 | A_09_P064681 | 9.20613  | -3.53546 | 3.932E-05 | 0.00750 |
|             | 10299 | A_09_P209530 | 9.91909  | -3.51265 | 1.119E-04 | 0.00954 |
| GstD2       | 35205 | A_09_P147905 | 6.41932  | -1.80135 | 1.282E-04 | 0.01012 |
|             | 17233 | A_09_P011881 | 6.40633  | -1.61463 | 2.545E-04 | 0.01286 |
|             | 30486 | A_09_P011881 | 6.59851  | -1.52136 | 2.990E-04 | 0.01378 |
| GstD3       | 24990 | A_09_P011886 | 9.59964  | -1.57554 | 1.740E-03 | 0.03202 |
|             | 24441 | A_09_P011886 | 9.58407  | -1.42563 | 3.471E-03 | 0.04305 |
| GstD4       | 3955  | A_09_P011891 | 7.05243  | -0.93561 | 2.122E-03 | 0.03511 |
|             | 42966 | A_09_P011891 | 7.01517  | -0.88092 | 2.101E-03 | 0.03496 |
| GstD6       | 11266 | A_09_P011901 | 5.36996  | -1.46456 | 2.019E-04 | 0.01183 |
|             | 9812  | A_09_P011901 | 5.34157  | -1.33014 | 2.062E-03 | 0.03464 |
| GstD9       | 36371 | A_09_P074286 | 11.69442 | -1.92309 | 4.262E-05 | 0.00750 |
| GstE5       | 8378  | A_09_P001981 | 10.61917 | -2.20438 | 2.972E-04 | 0.01375 |
|             | 14178 | A_09_P001981 | 10.53837 | -2.18645 | 1.483E-04 | 0.01048 |
|             | 26666 | A_09_P110960 | 9.01981  | -1.88829 | 3.374E-04 | 0.01453 |
| GstE6       | 15967 | A_09_P001976 | 9.32970  | -2.74495 | 2.068E-05 | 0.00643 |
|             | 1571  | A_09_P001976 | 9.12311  | -2.55184 | 5.402E-05 | 0.00782 |
| GstE7       | 6218  | A_09_P001971 | 7.96691  | -1.93729 | 3.405E-05 | 0.00750 |
|             | 39291 | A_09_P001971 | 7.99043  | -1.91433 | 4.784E-05 | 0.00755 |
| GstE8       | 24607 | A_09_P001966 | 6.04514  | -0.88358 | 3.112E-03 | 0.04102 |
| GstE9       | 27135 | A_09_P001961 | 6.87753  | -1.02802 | 9.852E-04 | 0.02413 |
|             | 15744 | A_09_P001961 | 6.92189  | -0.91952 | 1.267E-03 | 0.02723 |
| H2.0        | 28508 | A_09_P042671 | 5.27467  | -1.00421 | 2.337E-03 | 0.03643 |
| Hen1        | 3873  | A_09_P006676 | 11.16825 | -0.79370 | 2.835E-03 | 0.03947 |
| hig         | 40394 | A_09_P011971 | 6.29173  | -2.04159 | 2.542E-03 | 0.03771 |
|             | 724   | A_09_P011971 | 6.18641  | -1.87755 | 1.873E-03 | 0.02826 |
| hipk        | 34739 | A_09_P188060 | 12.52184 | -0.98930 | 2.921E-03 | 0.03996 |
|             | 35996 | A_09_P028001 | 11.23458 | -0.98854 | 2.058E-03 | 0.03462 |
|             | 19159 | A_09_P028001 | 11.16299 | -0.70545 | 4.710E-03 | 0.04999 |
| HLH4C       | 35401 | A_09_P013011 | 3.57004  | -0.79654 | 3.023E-03 | 0.04053 |
| HLHm7       | 35451 | A_09_P180645 | 10.62556 | -1.22515 | 3.599E-04 | 0.01468 |
| Hsp22       | 40043 | A_09_P042786 | 12.20019 | -0.80120 | 2.416E-03 | 0.03686 |
|             | 22406 | A_09_P042786 | 12.08706 | -0.71719 | 4.113E-03 | 0.04687 |
| Hsp67Bb     | 153   | A_09_P042811 | 10.22583 | -1.41031 | 3.335E-04 | 0.01453 |
|             | 38440 | A_09_P042811 | 10.13741 | -1.23231 | 3.372E-04 | 0.01453 |
| Hsp70Bb     | 17820 | A_09_P029581 | 12.33108 | -0.93044 | 4.683E-03 | 0.04995 |
| Idgf4       | 40411 | A_09_P078611 | 9.57545  | -0.78771 | 3.093E-03 | 0.04092 |
| Ilp2        | 32637 | A_09_P054556 | 4.07156  | -2.47422 | 1.523E-04 | 0.01058 |
|             | 44657 | A_09_P054556 | 3.69855  | -1.67805 | 2.225E-03 | 0.03598 |
| Invadolysin | 43029 | A_09_P107150 | 7.90579  | -0.87674 | 3.405E-03 | 0.04274 |
| inx2        | 381   | A_09_P079136 | 12.03965 | -0.80673 | 2.554E-03 | 0.03772 |
|             | 5075  | A_09_P079136 | 12.24264 | -0.77645 | 2.869E-03 | 0.03966 |
| inx3        | 9408  | A_09_P064886 | 9.50894  | -1.10467 | 2.420E-03 | 0.03686 |
| inx7        | 2902  | A_09_P079121 | 5.45995  | -1.58112 | 1.564E-03 | 0.03039 |
|             | 44046 | A_09_P177915 | 6.64262  | -1.29224 | 6.543E-04 | 0.01965 |
| IP3K1       | 2976  | A_09_P108475 | 10.12336 | -0.93673 | 4.479E-03 | 0.04890 |
| Ir52c       | 19727 | A_09_P058561 | 5.14578  | -0.88815 | 2.296E-03 | 0.03628 |
|             | 13948 | A_09_P058561 | 5.32045  | -0.77675 | 3.846E-03 | 0.04514 |
| jar         | 44306 | A_09_P012921 | 8.05114  | -0.80918 | 2.427E-03 | 0.03690 |
| Jhl-26      | 9433  | A_09_P065051 | 10.10602 | -1.72481 | 2.043E-04 | 0.01192 |
| kek5        | 37568 | A_09_P040471 | 12.20225 | -1.16033 | 3.714E-03 | 0.04463 |
|             | 11922 | A_09_P172690 | 10.48371 | -0.94266 | 3.881E-03 | 0.04540 |
| Kmn1        | 37594 | A_09_P079151 | 9.63692  | -1.80280 | 6.550E-05 | 0.00827 |
|             | 12874 | A_09_P079151 | 9.91900  | -1.76358 | 3.994E-05 | 0.00750 |
| kni         | 9631  | A_09_P042996 | 4.58547  | -1.03552 | 1.222E-03 | 0.02685 |
| Kr          | 32332 | A_09_P043016 | 6.28931  | -1.15090 | 4.173E-03 | 0.04708 |
| l(2)01810   | 28619 | A_09_P012596 | 8.99490  | -0.81033 | 4.403E-03 | 0.04852 |
| l(3)neo38   | 13946 | A_09_P050936 | 13.92706 | -0.97969 | 1.084E-03 | 0.02534 |
|             | 36780 | A_09_P116250 | 11.34568 | -0.93033 | 1.866E-03 | 0.03304 |
|             | 22967 | A_09_P203805 | 8.57574  | -0.84514 | 3.190E-03 | 0.04151 |
|             | 42411 | A_09_P126260 | 10.98347 | -0.80607 | 3.830E-03 | 0.04504 |
| lama        | 31816 | A_09_P031426 | 7.53789  | -1.52737 | 5.404E-04 | 0.01786 |
|             | 37163 | A_09_P031426 | 7.47802  | -1.49108 | 1.002E-03 | 0.02433 |
| LanA        | 17648 | A_09_P043306 | 9.92497  | -1.67382 | 6.627E-05 | 0.00827 |
| LanB1       | 15218 | A_09_P043311 | 11.39461 | -0.76661 | 4.033E-03 | 0.04642 |



|            |       |              |          |          |           |         |
|------------|-------|--------------|----------|----------|-----------|---------|
|            | 40410 | A_09_P043311 | 11.25867 | -0.75271 | 3.330E-03 | 0.04236 |
| laza       | 7462  | A_09_P035741 | 7.56613  | -2.14437 | 1.445E-03 | 0.02913 |
|            | 27231 | A_09_P140075 | 7.55825  | -1.90329 | 1.232E-03 | 0.02695 |
| lbn        | 10847 | A_09_P031431 | 8.57978  | -1.30719 | 2.068E-04 | 0.01192 |
|            | 28657 | A_09_P031431 | 8.19054  | -1.22040 | 5.806E-04 | 0.01853 |
| lea        | 18419 | A_09_P043346 | 8.33884  | -2.35423 | 1.010E-05 | 0.00581 |
|            | 25827 | A_09_P043346 | 8.35260  | -2.17133 | 2.506E-05 | 0.00683 |
|            | 32337 | A_09_P133790 | 7.04426  | -1.34191 | 4.135E-04 | 0.01571 |
| lectin-28C | 8082  | A_09_P115030 | 4.31620  | -0.91463 | 2.646E-03 | 0.03821 |
| Letm1      | 34521 | A_09_P117140 | 12.49770 | -0.90119 | 1.838E-03 | 0.03277 |
| Lip3       | 44822 | A_09_P076441 | 6.12869  | -1.22399 | 4.291E-03 | 0.04771 |
| Lk6        | 25726 | A_09_P117490 | 13.41238 | -0.81989 | 2.381E-03 | 0.03663 |
|            | 32715 | A_09_P031896 | 12.73432 | -0.71686 | 4.696E-03 | 0.04995 |
| lmd        | 19930 | A_09_P070481 | 3.33287  | -1.07668 | 2.623E-03 | 0.03809 |
| Lsp1beta   | 41675 | A_09_P043366 | 8.06663  | -1.05277 | 1.016E-03 | 0.02450 |
|            | 45082 | A_09_P043366 | 7.94583  | -1.01574 | 2.249E-03 | 0.03604 |
| mbl        | 23879 | A_09_P017096 | 9.61426  | -1.13137 | 2.375E-03 | 0.03661 |
| Mdr65      | 44895 | A_09_P010666 | 5.68309  | -1.74293 | 4.273E-05 | 0.00750 |
| melt       | 5535  | A_09_P045646 | 7.21245  | -1.07739 | 2.662E-03 | 0.03829 |
| Men        | 5584  | A_09_P043541 | 12.15457 | -2.28426 | 8.373E-06 | 0.00581 |
|            | 31172 | A_09_P091290 | 9.63463  | -2.26774 | 2.652E-05 | 0.00686 |
|            | 15773 | A_09_P090755 | 12.82783 | -1.21536 | 4.445E-04 | 0.01633 |
| miple2     | 10819 | A_09_P066351 | 9.83735  | -1.75957 | 6.508E-05 | 0.00827 |
|            | 2898  | A_09_P066351 | 9.44061  | -1.67446 | 1.394E-04 | 0.01036 |
| mnd        | 36460 | A_09_P154825 | 8.71909  | -1.59167 | 2.422E-04 | 0.01261 |
|            | 1709  | A_09_P043611 | 8.11153  | -1.53481 | 3.135E-04 | 0.01419 |
|            | 26687 | A_09_P043611 | 8.23566  | -1.51396 | 3.409E-04 | 0.01453 |
| Mocs1      | 41803 | A_09_P045656 | 10.35880 | -0.70257 | 4.611E-03 | 0.04967 |
| modSP      | 36166 | A_09_P059336 | 9.77331  | -2.18101 | 5.335E-05 | 0.00782 |
|            | 27668 | A_09_P059336 | 9.62790  | -1.85587 | 1.022E-04 | 0.00938 |
|            | 4568  | A_09_P198635 | 8.39199  | -1.45276 | 1.583E-04 | 0.01068 |
| Msp-300    | 4398  | A_09_P050461 | 9.74806  | -2.34335 | 1.391E-04 | 0.01036 |
|            | 20893 | A_09_P050976 | 5.91635  | -1.79670 | 4.729E-05 | 0.00755 |
|            | 38664 | A_09_P166080 | 9.19804  | -1.28222 | 4.356E-03 | 0.04821 |
|            | 29967 | A_09_P046011 | 8.35749  | -1.05968 | 5.983E-04 | 0.01885 |
| msta       | 15352 | A_09_P000246 | 6.55871  | -2.22834 | 1.100E-04 | 0.00952 |
| mthl3      | 40262 | A_09_P066206 | 9.14810  | -1.96594 | 2.221E-04 | 0.01233 |
|            | 23804 | A_09_P066206 | 9.25255  | -1.87168 | 2.925E-04 | 0.01365 |
| mthl4      | 43920 | A_09_P008681 | 7.54751  | -2.21730 | 2.289E-04 | 0.01246 |
|            | 8691  | A_09_P008681 | 7.84328  | -2.04591 | 1.247E-04 | 0.01005 |
| mthl5      | 39585 | A_09_P074051 | 7.19831  | -1.28532 | 2.076E-04 | 0.01192 |
|            | 44144 | A_09_P074051 | 7.28827  | -1.20442 | 6.112E-04 | 0.01907 |
| MtnD       | 15271 | A_09_P017061 | 8.09832  | -1.08653 | 4.392E-03 | 0.04847 |
| Myo10A     | 14782 | A_09_P037516 | 7.42853  | -1.15140 | 2.088E-03 | 0.03496 |
| myoglianin | 9219  | A_09_P078306 | 9.94748  | -1.02420 | 1.638E-03 | 0.03107 |
|            | 24237 | A_09_P078306 | 9.74340  | -0.96218 | 1.153E-03 | 0.02606 |
| mys        | 43489 | A_09_P010991 | 10.45109 | -0.95414 | 2.018E-03 | 0.03429 |
|            | 43249 | A_09_P010991 | 10.45271 | -0.95325 | 1.710E-03 | 0.03195 |
| N          | 8672  | A_09_P010921 | 11.17435 | -1.16324 | 6.703E-04 | 0.01986 |
|            | 11845 | A_09_P050251 | 12.95176 | -0.90767 | 1.928E-03 | 0.03358 |
| nan        | 5444  | A_09_P213845 | 5.86420  | -0.96763 | 2.593E-03 | 0.03797 |
| ND75       | 36896 | A_09_P140975 | 8.17926  | -0.88963 | 3.687E-03 | 0.04458 |
| Ndae1      | 17784 | A_09_P020306 | 11.00919 | -0.84962 | 2.060E-03 | 0.03463 |
| Nep3       | 24988 | A_09_P040711 | 8.18470  | -1.47924 | 1.507E-04 | 0.01054 |
|            | 4148  | A_09_P040711 | 8.40669  | -1.44837 | 1.772E-04 | 0.01142 |
|            | 7412  | A_09_P143385 | 9.11908  | -1.20898 | 6.164E-04 | 0.01910 |
| nerfin-1   | 38817 | A_09_P066346 | 6.71356  | -1.00123 | 3.554E-03 | 0.04357 |
| net        | 40137 | A_09_P043836 | 5.64419  | -2.02996 | 4.439E-05 | 0.00750 |
|            | 22128 | A_09_P043836 | 5.44376  | -1.64255 | 5.564E-05 | 0.00790 |
|            | 33254 | A_09_P104200 | 6.36166  | -1.27159 | 4.183E-04 | 0.01582 |
| Nhe2       | 43639 | A_09_P189445 | 9.17104  | -1.25444 | 2.599E-04 | 0.01293 |
|            | 43111 | A_09_P045726 | 9.94160  | -1.24269 | 2.776E-04 | 0.01335 |
| ninaC      | 39722 | A_09_P043866 | 6.28809  | -0.86659 | 3.675E-03 | 0.04451 |
| noc        | 33758 | A_09_P011806 | 9.40192  | -2.53779 | 1.349E-05 | 0.00614 |
|            | 22078 | A_09_P011806 | 9.41328  | -2.51875 | 1.141E-05 | 0.00591 |

|           |       |              |          |          |           |         |
|-----------|-------|--------------|----------|----------|-----------|---------|
| nompC     | 38851 | A_09_P031696 | 5.41500  | -1.27548 | 2.644E-03 | 0.03821 |
|           | 8951  | A_09_P031696 | 5.49832  | -1.23579 | 2.146E-03 | 0.03537 |
| Nplp2     | 26788 | A_09_P047146 | 5.41449  | -1.03202 | 2.215E-03 | 0.03592 |
| null0     | 7651  | A_09_P010186 | 4.18239  | -0.94278 | 4.126E-03 | 0.04693 |
| Oatp30B   | 38295 | A_09_P021126 | 8.24147  | -1.22287 | 1.330E-03 | 0.02800 |
|           | 38992 | A_09_P021126 | 8.12951  | -1.19140 | 1.022E-03 | 0.02450 |
| obst-F    | 28586 | A_09_P034926 | 6.88305  | -1.86919 | 3.445E-04 | 0.01453 |
|           | 5803  | A_09_P034926 | 6.75200  | -1.65487 | 2.738E-04 | 0.01328 |
| Octbeta3R | 19818 | A_09_P169470 | 6.89122  | -0.76644 | 3.791E-03 | 0.04480 |
| odd       | 22692 | A_09_P131435 | 4.36396  | -1.66619 | 1.418E-04 | 0.01044 |
| ogre      | 16526 | A_09_P143495 | 9.09269  | -1.80040 | 4.850E-04 | 0.01690 |
|           | 36047 | A_09_P010916 | 9.96330  | -1.64101 | 1.423E-04 | 0.01044 |
|           | 10474 | A_09_P010916 | 9.96528  | -1.55128 | 2.180E-04 | 0.01220 |
|           | 33570 | A_09_P135225 | 9.21834  | -1.31887 | 3.069E-04 | 0.01401 |
|           | 36621 | A_09_P078521 | 8.97879  | -0.94424 | 2.831E-03 | 0.03947 |
| Or46a     | 35907 | A_09_P048681 | 7.15888  | -1.44520 | 1.216E-04 | 0.00996 |
| Orct2     | 18219 | A_09_P048681 | 7.11992  | -1.35095 | 4.108E-04 | 0.01569 |
|           | 12046 | A_09_P105285 | 4.12713  | -0.87729 | 4.110E-03 | 0.04687 |
| pain      | 26353 | A_09_P187395 | 10.98216 | -1.34954 | 2.409E-04 | 0.01261 |
|           | 44683 | A_09_P181735 | 11.03971 | -1.07581 | 1.108E-03 | 0.02556 |
|           | 1728  | A_09_P001821 | 8.02197  | -1.02950 | 1.031E-03 | 0.02456 |
|           | 4614  | A_09_P001821 | 8.09134  | -0.98624 | 9.763E-04 | 0.02401 |
|           | 29130 | A_09_P151010 | 3.50519  | -1.58085 | 8.839E-04 | 0.02280 |
| Peb       | 11395 | A_09_P010261 | 4.80339  | -1.02267 | 4.129E-03 | 0.04695 |
| PGRP-LB   | 34279 | A_09_P073846 | 8.35492  | -0.93702 | 1.460E-03 | 0.02924 |
| pirk      | 34801 | A_09_P207530 | 6.62042  | -2.04620 | 1.728E-05 | 0.00614 |
|           | 19726 | A_09_P215370 | 6.49797  | -1.88535 | 3.534E-05 | 0.00750 |
|           | 11335 | A_09_P026156 | 6.65859  | -1.79171 | 3.357E-05 | 0.00750 |
|           | 16545 | A_09_P026156 | 6.49433  | -1.76346 | 5.391E-05 | 0.00782 |
|           | 42040 | A_09_P042051 | 7.18318  | -2.44537 | 3.677E-04 | 0.01479 |
|           | 12679 | A_09_P042051 | 7.46548  | -2.36863 | 1.066E-04 | 0.00943 |
| Pkd2      | 4933  | A_09_P064111 | 6.67184  | -1.99881 | 1.350E-03 | 0.02822 |
|           | 16072 | A_09_P064111 | 6.69054  | -1.63570 | 1.512E-03 | 0.02996 |
| pnt       | 24625 | A_09_P135145 | 11.99813 | -1.04643 | 1.734E-03 | 0.03202 |
|           | 62    | A_09_P044171 | 11.69586 | -1.03854 | 2.453E-03 | 0.03690 |
|           | 31865 | A_09_P142265 | 6.84701  | -1.02848 | 2.447E-03 | 0.03690 |
|           | 42973 | A_09_P044171 | 11.46261 | -0.93832 | 3.730E-03 | 0.04464 |
|           | 31510 | A_09_P044171 | 11.55923 | -0.91810 | 4.134E-03 | 0.04695 |
|           | 4671  | A_09_P044171 | 11.69422 | -0.90096 | 4.424E-03 | 0.04858 |
| pot       | 42528 | A_09_P044171 | 11.50705 | -0.87351 | 3.671E-03 | 0.04451 |
|           | 27576 | A_09_P128510 | 5.05922  | -1.98073 | 4.324E-04 | 0.01609 |
| Pp1-13C   | 11842 | A_09_P044191 | 7.20401  | -1.04255 | 1.511E-03 | 0.02995 |
| ppk28     | 10518 | A_09_P039591 | 8.15886  | -1.00060 | 2.921E-03 | 0.03996 |
| Ppm1      | 41625 | A_09_P028006 | 8.69482  | -1.43473 | 3.165E-04 | 0.01429 |
| PPYR1     | 25966 | A_09_P038906 | 5.05176  | -3.26902 | 3.635E-04 | 0.01472 |
|           | 42054 | A_09_P038906 | 4.95152  | -2.95119 | 9.131E-04 | 0.02326 |
| Prx2540-2 | 3483  | A_09_P006101 | 7.78587  | -1.16853 | 4.906E-04 | 0.01698 |
| ps        | 40458 | A_09_P193630 | 9.86568  | -1.29925 | 6.950E-04 | 0.02016 |
|           | 20817 | A_09_P078251 | 9.56211  | -1.08292 | 1.418E-03 | 0.02876 |
|           | 7683  | A_09_P078251 | 9.55519  | -1.03102 | 1.250E-03 | 0.02712 |
|           | 38290 | A_09_P078256 | 8.74309  | -0.95649 | 3.725E-03 | 0.04464 |
|           | 33554 | A_09_P179165 | 9.33193  | -0.94287 | 3.239E-03 | 0.04185 |
|           | 8422  | A_09_P136435 | 9.14904  | -0.81659 | 4.249E-03 | 0.04753 |
|           | 35402 | A_09_P203075 | 11.83269 | -0.85708 | 3.477E-03 | 0.04306 |
| puc       | 39500 | A_09_P010281 | 11.10405 | -0.90762 | 2.877E-03 | 0.03971 |
| pum       | 32261 | A_09_P181770 | 11.77562 | -1.43363 | 6.800E-04 | 0.02000 |
|           | 32660 | A_09_P044261 | 12.13984 | -0.82234 | 2.923E-03 | 0.03996 |
| Pvf2      | 31772 | A_09_P020266 | 7.07312  | -2.37585 | 1.805E-05 | 0.00620 |
|           | 34312 | A_09_P020266 | 7.13291  | -2.32889 | 1.379E-05 | 0.00614 |
|           | 24728 | A_09_P121465 | 7.63239  | -2.10307 | 3.623E-05 | 0.00750 |
| Pvf3      | 21703 | A_09_P121460 | 7.64135  | -2.46619 | 1.929E-04 | 0.01170 |
|           | 671   | A_09_P164230 | 10.03467 | -1.39452 | 1.958E-04 | 0.01174 |
| pyd3      | 23787 | A_09_P037061 | 5.42215  | -1.09299 | 6.083E-04 | 0.01907 |
|           | 6658  | A_09_P037061 | 5.28840  | -0.97671 | 1.234E-03 | 0.02697 |
| qtc       | 27132 | A_09_P065466 | 6.46765  | -1.02832 | 1.085E-03 | 0.02534 |

|          |       |              |          |          |           |         |
|----------|-------|--------------|----------|----------|-----------|---------|
|          | 9278  | A_09_P065466 | 6.65745  | -1.01055 | 2.510E-03 | 0.03746 |
|          | 19137 | A_09_P153140 | 6.04700  | -0.94472 | 1.118E-03 | 0.02560 |
| qvr      | 16177 | A_09_P017656 | 6.74426  | -1.18220 | 3.754E-03 | 0.04465 |
|          | 30762 | A_09_P017656 | 6.61776  | -1.03999 | 3.093E-03 | 0.04092 |
| r-cup    | 31560 | A_09_P040936 | 7.20157  | -1.15259 | 1.310E-03 | 0.02769 |
|          | 14974 | A_09_P040936 | 7.23848  | -0.97798 | 4.210E-03 | 0.04733 |
| Rab8     | 3580  | A_09_P134980 | 10.02637 | -0.77026 | 3.569E-03 | 0.04369 |
| Rab9Fb   | 19012 | A_09_P016151 | 7.99575  | -0.96035 | 1.492E-03 | 0.02964 |
| RabX5    | 42480 | A_09_P112940 | 6.26567  | -2.62546 | 5.043E-05 | 0.00761 |
|          | 42951 | A_09_P028446 | 7.30045  | -2.01230 | 5.574E-05 | 0.00790 |
| ref(2)P  | 12557 | A_09_P044376 | 12.07904 | -0.93073 | 2.359E-03 | 0.03643 |
|          | 22119 | A_09_P044376 | 11.83568 | -0.85735 | 2.442E-03 | 0.03690 |
|          | 8035  | A_09_P198585 | 11.97686 | -0.75514 | 3.731E-03 | 0.04464 |
| Rh7      | 15121 | A_09_P055306 | 6.97771  | -0.79774 | 3.270E-03 | 0.04201 |
| RpL10Aa  | 23993 | A_09_P075236 | 4.05869  | -0.84138 | 2.419E-03 | 0.03686 |
| rpr      | 44758 | A_09_P013426 | 8.10164  | -2.12707 | 2.603E-04 | 0.01293 |
| Rtnl1    | 26584 | A_09_P016851 | 10.99068 | -0.87832 | 2.989E-03 | 0.04025 |
|          | 6145  | A_09_P136610 | 9.54918  | -0.79158 | 3.392E-03 | 0.04263 |
| Rya-r44F | 13843 | A_09_P102745 | 7.64266  | -1.67076 | 2.973E-04 | 0.01375 |
| scb      | 29576 | A_09_P044561 | 8.66924  | -1.53879 | 1.564E-04 | 0.01068 |
|          | 4119  | A_09_P187265 | 5.95267  | -1.52600 | 2.842E-04 | 0.01344 |
|          | 7101  | A_09_P044561 | 8.55951  | -1.50092 | 3.976E-04 | 0.01549 |
| scyl     | 19463 | A_09_P224725 | 10.14757 | -1.03698 | 1.113E-03 | 0.02557 |
|          | 34761 | A_09_P063976 | 10.12366 | -0.96065 | 1.789E-03 | 0.03218 |
| sda      | 19914 | A_09_P030891 | 9.48474  | -2.70213 | 7.562E-06 | 0.00581 |
|          | 22081 | A_09_P030891 | 9.43230  | -2.61213 | 5.574E-06 | 0.00581 |
| Sema-5c  | 24018 | A_09_P065586 | 9.32901  | -1.41151 | 3.900E-04 | 0.01531 |
|          | 42804 | A_09_P065586 | 9.25579  | -1.32334 | 2.819E-04 | 0.01338 |
| shep     | 36181 | A_09_P205975 | 11.37792 | -1.21803 | 2.436E-03 | 0.03690 |
| shn      | 27055 | A_09_P044726 | 11.07687 | -0.97766 | 2.079E-03 | 0.03490 |
|          | 533   | A_09_P044726 | 10.93640 | -0.96268 | 3.271E-03 | 0.04201 |
| shot     | 29507 | A_09_P047301 | 11.91381 | -1.65685 | 8.180E-05 | 0.00873 |
| sif      | 33444 | A_09_P134315 | 10.69437 | -1.41319 | 8.847E-04 | 0.02280 |
|          | 28896 | A_09_P004331 | 10.46332 | -1.38953 | 3.094E-03 | 0.04092 |
|          | 14467 | A_09_P004336 | 7.56134  | -0.93219 | 2.409E-03 | 0.03686 |
| skl      | 28876 | A_09_P034256 | 5.84660  | -1.73344 | 1.308E-04 | 0.01014 |
|          | 18047 | A_09_P034256 | 5.94726  | -1.61793 | 1.008E-04 | 0.00935 |
| sli      | 44588 | A_09_P047561 | 10.02474 | -0.77825 | 3.453E-03 | 0.04299 |
| slo      | 17131 | A_09_P044766 | 5.38091  | -1.30773 | 8.254E-04 | 0.02201 |
| slou     | 37586 | A_09_P043881 | 6.19328  | -0.92374 | 3.138E-03 | 0.04114 |
| sls      | 38881 | A_09_P045221 | 7.23874  | -1.20142 | 4.365E-03 | 0.04825 |
| sm       | 21501 | A_09_P192270 | 7.77784  | -1.92418 | 4.116E-03 | 0.04689 |
|          | 573   | A_09_P187005 | 8.44725  | -1.56684 | 3.483E-03 | 0.04307 |
|          | 17355 | A_09_P209295 | 6.95469  | -1.55394 | 2.311E-03 | 0.03637 |
|          | 41100 | A_09_P049316 | 9.04072  | -1.27099 | 5.536E-04 | 0.01816 |
|          | 33261 | A_09_P044786 | 9.88203  | -1.21019 | 1.803E-03 | 0.03231 |
|          | 18118 | A_09_P044786 | 9.87680  | -1.15269 | 1.990E-03 | 0.03404 |
| sns      | 15344 | A_09_P076681 | 7.66061  | -0.94094 | 1.754E-03 | 0.03205 |
|          | 19232 | A_09_P171072 | 7.88512  | -0.91672 | 1.846E-03 | 0.03285 |
|          | 42018 | A_09_P076681 | 7.45547  | -0.89047 | 3.276E-03 | 0.04201 |
| Socs36E  | 36849 | A_09_P045976 | 9.36027  | -2.60895 | 4.833E-05 | 0.00755 |
| Sox14    | 5155  | A_09_P148280 | 6.30029  | -1.17291 | 2.921E-03 | 0.03996 |
| Sox15    | 28541 | A_09_P011551 | 7.42397  | -1.30924 | 1.867E-03 | 0.03304 |
| Spn100A  | 57    | A_09_P061456 | 7.58661  | -0.85500 | 2.181E-03 | 0.03564 |
| step     | 585   | A_09_P202550 | 8.06809  | -0.93677 | 2.448E-03 | 0.03690 |
| stv      | 3913  | A_09_P014671 | 8.04322  | -0.76865 | 4.422E-03 | 0.04858 |
| sty      | 20530 | A_09_P196120 | 10.00320 | -0.75112 | 3.725E-03 | 0.04464 |
| su(r)    | 7675  | A_09_P150565 | 5.37519  | -1.40100 | 8.637E-04 | 0.02259 |
| Su(z)2   | 44664 | A_09_P011861 | 9.99590  | -1.68891 | 4.176E-04 | 0.01582 |
|          | 26605 | A_09_P011861 | 10.11752 | -1.62534 | 3.742E-04 | 0.01496 |
| Sxl      | 12810 | A_09_P143460 | 7.62724  | -1.14803 | 4.709E-03 | 0.04999 |
| Syt1     | 26229 | A_09_P049161 | 6.27245  | -1.36484 | 1.728E-04 | 0.01129 |
| tai      | 12133 | A_09_P063971 | 9.89384  | -1.13179 | 1.647E-03 | 0.03111 |
|          | 7514  | A_09_P174985 | 8.25210  | -0.99807 | 2.609E-03 | 0.03802 |
| tal-AA   | 5512  | A_09_P194030 | 9.34811  | -2.13178 | 7.524E-05 | 0.00850 |

|           |       |              |          |          |           |         |
|-----------|-------|--------------|----------|----------|-----------|---------|
|           | 22980 | A_09_P184935 | 7.42769  | -1.54079 | 3.628E-04 | 0.01472 |
| TepII     | 5399  | A_09_P213450 | 7.51882  | -2.19783 | 3.480E-04 | 0.01459 |
|           | 3608  | A_09_P064071 | 7.94086  | -1.89323 | 1.817E-04 | 0.01142 |
|           | 6660  | A_09_P064071 | 7.94118  | -1.81457 | 2.742E-04 | 0.01328 |
| TepIV     | 43713 | A_09_P064061 | 10.69753 | -1.10369 | 1.078E-03 | 0.02524 |
|           | 9082  | A_09_P064061 | 11.03932 | -1.04599 | 1.550E-03 | 0.03031 |
| Thor      | 14242 | A_09_P032876 | 11.08811 | -1.67839 | 7.320E-05 | 0.00848 |
|           | 19101 | A_09_P032876 | 10.89855 | -1.62878 | 6.153E-05 | 0.00827 |
| Tim13     | 37592 | A_09_P055096 | 8.90826  | -1.00232 | 1.393E-03 | 0.02851 |
| Tim17a1   | 41967 | A_09_P074281 | 8.51074  | -4.04326 | 1.303E-04 | 0.01014 |
|           | 12462 | A_09_P074281 | 9.00748  | -3.99853 | 8.628E-05 | 0.00882 |
|           | 13907 | A_09_P126325 | 6.23859  | -2.78614 | 3.756E-06 | 0.00581 |
| Tollo     | 6312  | A_09_P116390 | 5.99776  | -2.38678 | 2.201E-05 | 0.00656 |
|           | 34858 | A_09_P191795 | 8.67398  | -2.22740 | 1.896E-05 | 0.00634 |
|           | 1575  | A_09_P045751 | 6.54969  | -1.75260 | 4.894E-04 | 0.01698 |
| Traf-like | 9333  | A_09_P039416 | 9.64304  | -0.82646 | 2.849E-03 | 0.03956 |
|           | 3853  | A_09_P039416 | 9.42143  | -0.76865 | 4.161E-03 | 0.04702 |
| Tsp33B    | 3750  | A_09_P022066 | 8.61490  | -0.73788 | 4.405E-03 | 0.04852 |
| Tsp42Ed   | 44443 | A_09_P066596 | 8.99370  | -1.55659 | 7.255E-04 | 0.02054 |
|           | 29603 | A_09_P066596 | 9.21457  | -1.49146 | 3.602E-04 | 0.01468 |
| tw        | 9814  | A_09_P048691 | 8.81363  | -1.04726 | 1.013E-03 | 0.02447 |
|           | 898   | A_09_P048691 | 8.57145  | -0.99399 | 1.493E-03 | 0.02964 |
|           | 19556 | A_09_P048691 | 8.61275  | -0.98143 | 1.409E-03 | 0.02862 |
|           | 37239 | A_09_P048691 | 8.67357  | -0.95082 | 1.970E-03 | 0.03389 |
|           | 35814 | A_09_P048691 | 8.63806  | -0.92867 | 1.478E-03 | 0.02950 |
|           | 23014 | A_09_P048691 | 8.65574  | -0.92761 | 1.739E-03 | 0.03202 |
|           | 13262 | A_09_P048691 | 8.60253  | -0.92128 | 1.995E-03 | 0.03404 |
|           | 4101  | A_09_P048691 | 8.53385  | -0.86564 | 2.162E-03 | 0.03546 |
|           | 17438 | A_09_P048691 | 8.63300  | -0.86119 | 3.088E-03 | 0.04092 |
|           | 24847 | A_09_P048691 | 8.58806  | -0.85789 | 4.162E-03 | 0.04702 |
| Ugt35a    | 7652  | A_09_P078396 | 7.52996  | -1.15079 | 4.810E-04 | 0.01686 |
|           | 44846 | A_09_P078396 | 7.48718  | -1.01616 | 1.912E-03 | 0.03340 |
| Ugt86Da   | 24564 | A_09_P062526 | 8.95604  | -3.76931 | 1.169E-06 | 0.00581 |
| Ugt86De   | 42358 | A_09_P062511 | 4.97721  | -3.99252 | 3.072E-05 | 0.00710 |
|           | 1632  | A_09_P062511 | 4.93108  | -3.69684 | 1.452E-05 | 0.00614 |
| Ugt86Di   | 20314 | A_09_P113560 | 7.11042  | -1.77875 | 5.680E-04 | 0.01842 |
|           | 17529 | A_09_P062496 | 7.41694  | -1.69719 | 1.747E-04 | 0.01137 |
|           | 24186 | A_09_P062496 | 7.44014  | -1.40360 | 2.228E-04 | 0.01233 |
| unc-115   | 21073 | A_09_P073171 | 6.23127  | -0.95961 | 2.165E-03 | 0.03547 |
| unc-5     | 44816 | A_09_P179550 | 10.66941 | -1.29994 | 1.981E-04 | 0.01176 |
| unc79     | 19106 | A_09_P198005 | 6.20307  | -1.82321 | 4.914E-05 | 0.00755 |
| Uro       | 13933 | A_09_P009961 | 3.60787  | -1.61521 | 2.782E-04 | 0.01335 |
|           | 18890 | A_09_P009961 | 3.59853  | -1.00972 | 1.047E-03 | 0.02480 |
| VAcHT     | 22496 | A_09_P205590 | 6.34180  | -0.98122 | 1.187E-03 | 0.02653 |
| veil      | 26548 | A_09_P008701 | 6.60129  | -1.15160 | 1.119E-03 | 0.02560 |
| vg        | 33773 | A_09_P009991 | 7.78734  | -1.66807 | 2.240E-03 | 0.03603 |
|           | 15442 | A_09_P009991 | 7.87826  | -1.58502 | 2.285E-03 | 0.03628 |
| Vinc      | 31228 | A_09_P010486 | 8.44394  | -1.21195 | 3.116E-03 | 0.04105 |
|           | 7399  | A_09_P010486 | 8.29457  | -1.14002 | 3.573E-03 | 0.04371 |
| vir-1     | 10243 | A_09_P056621 | 6.55549  | -1.18053 | 2.287E-03 | 0.03628 |
|           | 33815 | A_09_P056616 | 8.07456  | -1.09626 | 2.324E-03 | 0.03637 |
|           | 41688 | A_09_P056616 | 8.04669  | -1.05387 | 2.352E-03 | 0.03643 |
| vri       | 7188  | A_09_P031491 | 6.52748  | -1.10748 | 4.683E-03 | 0.04995 |
| w         | 42415 | A_09_P046191 | 13.51650 | -3.42847 | 5.532E-05 | 0.00790 |
|           | 41490 | A_09_P010031 | 15.15003 | -3.36391 | 1.684E-06 | 0.00581 |
| wb        | 4966  | A_09_P171275 | 7.87952  | -1.40218 | 4.980E-04 | 0.01707 |
| wnd       | 33108 | A_09_P034701 | 7.93760  | -1.11434 | 8.546E-04 | 0.02247 |
| Wnt2      | 6466  | A_09_P010341 | 7.22725  | -1.16534 | 1.288E-03 | 0.02748 |
| Xbp1      | 14073 | A_09_P196055 | 13.15363 | -0.81107 | 3.691E-03 | 0.04458 |
|           | 13921 | A_09_P032791 | 12.28857 | -0.78104 | 4.228E-03 | 0.04735 |
| Xrp1      | 7259  | A_09_P069036 | 9.78726  | -1.72890 | 2.129E-04 | 0.01208 |
|           | 30887 | A_09_P184380 | 11.35486 | -1.70136 | 7.199E-04 | 0.02050 |
|           | 616   | A_09_P069036 | 9.75804  | -1.64669 | 2.801E-04 | 0.01338 |
| yellow-h  | 38797 | A_09_P061826 | 8.91118  | -1.00716 | 1.053E-03 | 0.02491 |
|           | 33119 | A_09_P061826 | 8.96728  | -0.97695 | 1.057E-03 | 0.02494 |

|      |       |              |          |          |           |         |
|------|-------|--------------|----------|----------|-----------|---------|
| yr1  | 44012 | A_09_P116530 | 10.03677 | -0.83772 | 4.214E-03 | 0.04733 |
| Z600 | 14931 | A_09_P010096 | 6.15506  | -1.29867 | 9.491E-04 | 0.02365 |
|      | 42539 | A_09_P010096 | 5.77940  | -1.26714 | 1.934E-03 | 0.03360 |

---

Supplementary Table S3. The top 10 GO categories enriched in the genes down-regulated in Ovo-B KD PGCs

Biological Process

| Term       | Name                                     | count* | p-value | q-value |
|------------|------------------------------------------|--------|---------|---------|
| GO:0048619 | embryonic hindgut morphogenesis          | 6      | 1.2E-03 | 4.0E-01 |
| GO:0048567 | ectodermal gut morphogenesis             | 6      | 6.0E-03 | 4.0E-01 |
| GO:0007439 | ectodermal gut development               | 6      | 6.0E-03 | 4.0E-01 |
| GO:0048546 | gut morphogenesis                        | 6      | 6.6E-03 | 4.1E-01 |
| GO:0009309 | amine biosynthetic process               | 6      | 6.6E-03 | 4.1E-01 |
| GO:0035239 | tube morphogenesis                       | 8      | 5.4E-03 | 4.2E-01 |
| GO:0008652 | cellular amino acid biosynthetic process | 5      | 5.9E-03 | 4.2E-01 |
| GO:0048546 | digestive tract morphogenesis            | 6      | 7.2E-03 | 4.2E-01 |
| GO:0055123 | digestive system development             | 6      | 7.2E-03 | 4.2E-01 |
| GO:0006270 | DNA replication initiation               | 5      | 4.5E-04 | 4.4E-01 |

Molecular Function

| Term       | Name                                                          | count* | p-value | q-value |
|------------|---------------------------------------------------------------|--------|---------|---------|
| GO:0043138 | 3'-5' DNA helicase activity                                   | 4      | 3.7E-03 | 6.0E-01 |
| GO:0030246 | carbohydrate binding                                          | 14     | 2.3E-03 | 6.7E-01 |
| GO:0030247 | polysaccharide binding                                        | 10     | 7.0E-03 | 6.8E-01 |
| GO:0001871 | pattern binding                                               | 10     | 7.0E-03 | 6.8E-01 |
| GO:0003824 | catalytic activity                                            | 129    | 2.5E-02 | 8.3E-01 |
| GO:0003678 | DNA helicase activity                                         | 5      | 2.3E-02 | 8.5E-01 |
| GO:0008061 | chitin binding                                                | 8      | 2.0E-02 | 8.6E-01 |
| GO:0016638 | oxidoreductase activity, acting on the CH-NH2 group of donors | 3      | 4.8E-02 | 8.9E-01 |
| GO:0004497 | monooxygenase activity                                        | 8      | 4.0E-02 | 8.9E-01 |
| GO:0042578 | phosphoric ester hydrolase activity                           | 11     | 6.7E-02 | 8.9E-01 |

\* No. of genes down-regulated in Ovo-B KD PGCs.

Supplementary Table S4. The top 10 GO categories enriched in the genes up-regulated in Ovo-B KD PGCs

Biological Process

| Term       | Name                                             | count* | p-value | q-value |
|------------|--------------------------------------------------|--------|---------|---------|
| GO:0048598 | embryonic morphogenesis                          | 26     | 9.8E-08 | 5.2E-05 |
| GO:0048731 | system development                               | 83     | 7.6E-08 | 6.0E-05 |
| GO:0009888 | tissue development                               | 38     | 1.5E-07 | 6.1E-05 |
| GO:0048513 | organ development                                | 70     | 2.5E-07 | 8.1E-05 |
| GO:0050896 | response to stimulus                             | 73     | 5.5E-08 | 8.8E-05 |
| GO:0007444 | imaginal disc development                        | 35     | 6.4E-07 | 1.7E-04 |
| GO:0009887 | organ morphogenesis                              | 47     | 1.4E-06 | 2.8E-04 |
| GO:0007610 | behavior                                         | 35     | 1.6E-06 | 2.9E-04 |
| GO:0007166 | cell surface receptor linked signal transduction | 45     | 1.3E-06 | 2.9E-04 |
| GO:0009790 | embryonic development                            | 42     | 2.7E-06 | 4.0E-04 |

Molecular Function

| Term       | Name                                                                        | count* | p-value | q-value |
|------------|-----------------------------------------------------------------------------|--------|---------|---------|
| GO:0004364 | glutathione transferase activity                                            | 12     | 3.3E-08 | 1.6E-05 |
| GO:0008083 | growth factor activity                                                      | 9      | 6.4E-06 | 1.0E-03 |
| GO:0016765 | transferase activity, transferring alkyl or aryl (other than methyl) groups | 12     | 6.3E-06 | 1.5E-03 |
| GO:0005102 | receptor binding                                                            | 19     | 1.8E-05 | 2.1E-03 |
| GO:0004872 | receptor activity                                                           | 36     | 3.6E-05 | 3.5E-03 |
| GO:0004871 | signal transducer activity                                                  | 42     | 5.7E-05 | 4.6E-03 |
| GO:0060089 | molecular transducer activity                                               | 42     | 5.7E-05 | 4.6E-03 |
| GO:0003779 | actin binding                                                               | 13     | 1.2E-03 | 7.9E-02 |
| GO:0004888 | transmembrane receptor activity                                             | 26     | 2.1E-03 | 1.2E-01 |
| GO:0015020 | glucuronosyltransferase activity                                            | 6      | 6.3E-03 | 2.6E-01 |

\* No. of genes up-regulated in Ovo-B KD PGCs.

## Supplementary Table S5. List of soma-enriched genes up-regulated in Ovo-B KD PGCs

\* This table shows the names of the genes expressed predominantly in PGCs (Adjusted p-value < 0.05; see SI Materials and Methods) that were significantly up-regulated in Ovo-B KD PGCs in comparison with control PGCs (q-value < 0.05; see SI Materials and Methods).

† The cell-type effect ( $C_i$ ) value was calculated using a linear model (see SI Materials and Methods).  $C_i$  represents the estimated fold change in PGCs relative to whole embryos (soma) in  $\log_2$  scale.

‡ The genotype effect ( $G_i$ ) value, or the estimated fold change in control PGCs vs Ovo-A-expressing PGCs in  $\log_2$  scale (Table S1) is shown again.

| Gene Name* | Probe Name         | PGCs/soma                                                   |           |                  | Cont./OvoB KD  |              |                                                                 |           |           |
|------------|--------------------|-------------------------------------------------------------|-----------|------------------|----------------|--------------|-----------------------------------------------------------------|-----------|-----------|
|            |                    | Cell-type effect†<br>[Fold Change: $\log_2$<br>(PGCs/soma)] | p-value   | Adjusted p-value | Feature Number | Probe Name   | Genotype effect ‡<br>[Fold Change: $\log_2$<br>(Cont./OvoB KD)] | p-value   | q-value   |
| abd-A      | CG10325_ESCL1_4595 | -4.122                                                      | 3.09.E-51 | 6.92.E-47        | 12788          | A_09_P041071 | -4.653                                                          | 3.53.E-05 | 7.50.E-03 |
|            |                    |                                                             |           |                  | 22071          | A_09_P041071 | -4.302                                                          | 3.85.E-05 | 7.50.E-03 |
|            |                    |                                                             |           |                  | 5347           | A_09_P052391 | -1.528                                                          | 9.11.E-05 | 9.01.E-03 |
| abd-A      | CG10325_ESCL2_926  | -1.024                                                      | 1.26.E-15 | 2.15.E-11        | 12788          | A_09_P041071 | -4.653                                                          | 3.53.E-05 | 7.50.E-03 |
|            |                    |                                                             |           |                  | 22071          | A_09_P041071 | -4.302                                                          | 3.85.E-05 | 7.50.E-03 |
|            |                    |                                                             |           |                  | 5347           | A_09_P052391 | -1.528                                                          | 9.11.E-05 | 9.01.E-03 |
| Abd-B      | CG11648_ESCL1_3370 | -2.553                                                      | 6.05.E-34 | 1.28.E-29        | 40218          | A_09_P052351 | -2.653                                                          | 3.58.E-04 | 1.47.E-02 |
|            |                    |                                                             |           |                  | 20805          | A_09_P052346 | -2.598                                                          | 2.09.E-05 | 6.43.E-03 |
|            |                    |                                                             |           |                  | 26764          | A_09_P041076 | -1.917                                                          | 3.93.E-04 | 1.54.E-02 |
|            |                    |                                                             |           |                  | 29190          | A_09_P041076 | -1.800                                                          | 3.60.E-04 | 1.47.E-02 |
|            |                    |                                                             |           |                  | 35341          | A_09_P051891 | -1.427                                                          | 9.80.E-04 | 2.40.E-02 |
|            |                    |                                                             |           |                  | 40218          | A_09_P052351 | -2.653                                                          | 3.58.E-04 | 1.47.E-02 |
| Abd-B      | CG11648_ESCL2_623  | -1.591                                                      | 1.05.E-26 | 2.09.E-22        | 20805          | A_09_P052346 | -2.598                                                          | 2.09.E-05 | 6.43.E-03 |
|            |                    |                                                             |           |                  | 26764          | A_09_P041076 | -1.917                                                          | 3.93.E-04 | 1.54.E-02 |
|            |                    |                                                             |           |                  | 29190          | A_09_P041076 | -1.800                                                          | 3.60.E-04 | 1.47.E-02 |
|            |                    |                                                             |           |                  | 35341          | A_09_P051891 | -1.427                                                          | 9.80.E-04 | 2.40.E-02 |
|            |                    |                                                             |           |                  | 40218          | A_09_P052351 | -2.653                                                          | 3.58.E-04 | 1.47.E-02 |
|            |                    |                                                             |           |                  | 29190          | A_09_P041076 | -1.800                                                          | 3.60.E-04 | 1.47.E-02 |
| Abd-B      | CGY0179_ESCL1_610  | -2.239                                                      | 7.69.E-18 | 1.36.E-13        | 35341          | A_09_P051891 | -1.427                                                          | 9.80.E-04 | 2.40.E-02 |
|            |                    |                                                             |           |                  | 40218          | A_09_P052351 | -2.653                                                          | 3.58.E-04 | 1.47.E-02 |
|            |                    |                                                             |           |                  | 20805          | A_09_P052346 | -2.598                                                          | 2.09.E-05 | 6.43.E-03 |
|            |                    |                                                             |           |                  | 26764          | A_09_P041076 | -1.917                                                          | 3.93.E-04 | 1.54.E-02 |
|            |                    |                                                             |           |                  | 29190          | A_09_P041076 | -1.800                                                          | 3.60.E-04 | 1.47.E-02 |
|            |                    |                                                             |           |                  | 35341          | A_09_P051891 | -1.427                                                          | 9.80.E-04 | 2.40.E-02 |
| Ac78C      | CG10564_ESCL1_6216 | -2.805                                                      | 3.76.E-32 | 7.85.E-28        | 21915          | A_09_P076641 | -2.161                                                          | 4.16.E-05 | 7.50.E-03 |
|            |                    |                                                             |           |                  | 33688          | A_09_P076641 | -2.007                                                          | 1.75.E-04 | 1.14.E-02 |
| Ac78C      | CG10564_ESCL2_5022 | -2.284                                                      | 5.20.E-32 | 1.09.E-27        | 21915          | A_09_P076641 | -2.161                                                          | 4.16.E-05 | 7.50.E-03 |
|            |                    |                                                             |           |                  | 33688          | A_09_P076641 | -2.007                                                          | 1.75.E-04 | 1.14.E-02 |
| Aldh       | CG3752_ESCL1_2113  | -0.880                                                      | 8.33.E-13 | 1.33.E-08        | 20565          | A_09_P029496 | -1.094                                                          | 7.83.E-04 | 2.14.E-02 |
|            |                    |                                                             |           |                  | 29958          | A_09_P029496 | -1.035                                                          | 8.95.E-04 | 2.30.E-02 |
| Aldh       | CG3752_ESCL2_1497  | -0.600                                                      | 5.92.E-13 | 9.51.E-09        | 20565          | A_09_P029496 | -1.094                                                          | 7.83.E-04 | 2.14.E-02 |
|            |                    |                                                             |           |                  | 29958          | A_09_P029496 | -1.035                                                          | 8.95.E-04 | 2.30.E-02 |
| AnnIX      | CG5730_ESCL1_1198  | -0.958                                                      | 6.08.E-16 | 1.04.E-11        | 38045          | A_09_P166180 | -0.936                                                          | 3.01.E-03 | 4.03.E-02 |
|            |                    |                                                             |           |                  | 38045          | A_09_P166180 | -0.936                                                          | 3.01.E-03 | 4.03.E-02 |
| AnnIX      | CG5730_ESCL2_897   | -1.182                                                      | 4.78.E-27 | 9.52.E-23        | 38045          | A_09_P166180 | -0.936                                                          | 3.01.E-03 | 4.03.E-02 |
|            |                    |                                                             |           |                  | 38045          | A_09_P166180 | -0.936                                                          | 3.01.E-03 | 4.03.E-02 |
| AnnIX      | CG5730_ESCL3_850   | -1.550                                                      | 4.44.E-30 | 9.11.E-26        | 38045          | A_09_P166180 | -0.936                                                          | 3.01.E-03 | 4.03.E-02 |
|            |                    |                                                             |           |                  | 38045          | A_09_P166180 | -0.936                                                          | 3.01.E-03 | 4.03.E-02 |
| AnnIX      | CGY0327_ESCL1_712  | -2.026                                                      | 7.45.E-43 | 1.64.E-38        | 38045          | A_09_P166180 | -0.936                                                          | 3.01.E-03 | 4.03.E-02 |
|            |                    |                                                             |           |                  | 2136           | A_09_P041291 | -1.243                                                          | 7.98.E-04 | 2.17.E-02 |
| aop        | CG3166_ESCL1_4748  | -2.525                                                      | 2.14.E-42 | 4.71.E-38        | 32150          | A_09_P041291 | -1.232                                                          | 1.03.E-03 | 2.46.E-02 |
|            |                    |                                                             |           |                  | 2136           | A_09_P041291 | -1.243                                                          | 7.98.E-04 | 2.17.E-02 |
|            |                    |                                                             |           |                  | 32150          | A_09_P041291 | -1.232                                                          | 1.03.E-03 | 2.46.E-02 |
| aop        | CG3166_ESCL2_1977  | -1.499                                                      | 7.64.E-32 | 1.59.E-27        | 2136           | A_09_P041291 | -1.243                                                          | 7.98.E-04 | 2.17.E-02 |
|            |                    |                                                             |           |                  | 32150          | A_09_P041291 | -1.232                                                          | 1.03.E-03 | 2.46.E-02 |
|            |                    |                                                             |           |                  | 16628          | A_09_P007636 | -0.981                                                          | 2.05.E-03 | 3.46.E-02 |
| Arc1       | CG12505_ESCL1_2260 | -1.871                                                      | 6.12.E-30 | 1.25.E-25        | 14034          | A_09_P007636 | -0.861                                                          | 4.49.E-03 | 4.89.E-02 |
|            |                    |                                                             |           |                  | 988            | A_09_P026031 | -1.481                                                          | 5.76.E-04 | 1.85.E-02 |
|            |                    |                                                             |           |                  | 23764          | A_09_P026031 | -1.383                                                          | 4.48.E-04 | 1.63.E-02 |
| ASPP       | CG18375_ESCL1_4512 | -1.404                                                      | 3.46.E-26 | 6.82.E-22        | 988            | A_09_P026031 | -1.481                                                          | 5.76.E-04 | 1.85.E-02 |
|            |                    |                                                             |           |                  | 23764          | A_09_P026031 | -1.383                                                          | 4.48.E-04 | 1.63.E-02 |
|            |                    |                                                             |           |                  | 13649          | A_09_P048181 | -0.776                                                          | 3.38.E-03 | 4.26.E-02 |
| ASPP       | CG18375_ESCL2_2727 | -0.555                                                      | 3.30.E-07 | 4.41.E-03        | 988            | A_09_P026031 | -1.481                                                          | 5.76.E-04 | 1.85.E-02 |
|            |                    |                                                             |           |                  | 23764          | A_09_P026031 | -1.383                                                          | 4.48.E-04 | 1.63.E-02 |
|            |                    |                                                             |           |                  | 13649          | A_09_P048181 | -0.776                                                          | 3.38.E-03 | 4.26.E-02 |
| bbg        | CG9598_ESCL1_3583  | -1.696                                                      | 2.00.E-24 | 3.87.E-20        | 13649          | A_09_P048181 | -0.776                                                          | 3.38.E-03 | 4.26.E-02 |
|            |                    |                                                             |           |                  | 38436          | A_09_P009901 | -1.363                                                          | 3.33.E-04 | 1.45.E-02 |
| betaTub60D | CG3401_ESCL1_2368  | -4.630                                                      | 1.17.E-45 | 2.61.E-41        | 25740          | A_09_P009901 | -1.223                                                          | 1.25.E-03 | 2.71.E-02 |
|            |                    |                                                             |           |                  | 38436          | A_09_P009901 | -1.363                                                          | 3.33.E-04 | 1.45.E-02 |
| betaTub60D | CG3401_ESCL2_1303  | -2.449                                                      | 2.06.E-22 | 3.89.E-18        | 25740          | A_09_P009901 | -1.223                                                          | 1.25.E-03 | 2.71.E-02 |
|            |                    |                                                             |           |                  | 38436          | A_09_P009901 | -1.363                                                          | 3.33.E-04 | 1.45.E-02 |
|            |                    |                                                             |           |                  | 25740          | A_09_P009901 | -1.223                                                          | 1.25.E-03 | 2.71.E-02 |
| bgm        | CG4501_ESCL1_2334  | -1.838                                                      | 1.98.E-38 | 4.29.E-34        | 14579          | A_09_P079256 | -0.879                                                          | 2.99.E-03 | 4.02.E-02 |
|            |                    |                                                             |           |                  | 4531           | A_09_P079256 | -0.860                                                          | 3.30.E-03 | 4.22.E-02 |
|            |                    |                                                             |           |                  | 5272           | A_09_P110773 | -0.821                                                          | 3.38.E-03 | 4.26.E-02 |



|         |                    |        |           |           |       |              |        |           |           |
|---------|--------------------|--------|-----------|-----------|-------|--------------|--------|-----------|-----------|
| bgm     | CG4501_ESCL2_1898  | -0.467 | 2.05.E-06 | 2.64.E-02 | 14579 | A_09_P079256 | -0.879 | 2.99.E-03 | 4.02.E-02 |
|         |                    |        |           |           | 4531  | A_09_P079256 | -0.860 | 3.30.E-03 | 4.22.E-02 |
| blot    | CG3897_ESCL1_3527  | -3.854 | 1.12.E-45 | 2.48.E-41 | 5272  | A_09_P110773 | -0.821 | 3.38.E-03 | 4.26.E-02 |
|         |                    |        |           |           | 3575  | A_09_P079886 | -2.440 | 2.34.E-03 | 3.64.E-02 |
| blot    | CG3897_ESCL2_2857  | -1.878 | 1.56.E-38 | 3.40.E-34 | 24204 | A_09_P079886 | -2.400 | 1.04.E-03 | 2.47.E-02 |
|         |                    |        |           |           | 3575  | A_09_P079886 | -2.440 | 2.34.E-03 | 3.64.E-02 |
| bnb     | CG7088_ESCL1_1954  | -4.451 | 5.30.E-44 | 1.17.E-39 | 24204 | A_09_P079886 | -2.400 | 1.04.E-03 | 2.47.E-02 |
|         |                    |        |           |           | 3533  | A_09_P042516 | -1.057 | 7.06.E-04 | 2.03.E-02 |
| bnb     | CG7088_ESCL2_1255  | -3.465 | 1.89.E-37 | 4.09.E-33 | 26570 | A_09_P042516 | -0.997 | 1.17.E-03 | 2.63.E-02 |
|         |                    |        |           |           | 3533  | A_09_P042516 | -1.057 | 7.06.E-04 | 2.03.E-02 |
| bowl    | CG10021_ESCL1_3301 | -4.040 | 2.04.E-42 | 4.50.E-38 | 26570 | A_09_P042516 | -0.997 | 1.17.E-03 | 2.63.E-02 |
|         |                    |        |           |           | 11503 | A_09_P011276 | -1.470 | 8.29.E-04 | 2.21.E-02 |
| bowl    | CG10021_ESCL2_2071 | -1.568 | 7.77.E-16 | 1.33.E-11 | 33128 | A_09_P011276 | -1.228 | 3.13.E-03 | 4.11.E-02 |
|         |                    |        |           |           | 11503 | A_09_P011276 | -1.470 | 8.29.E-04 | 2.21.E-02 |
| Brd     | CG3096_ESCL1_381   | -4.229 | 3.59.E-52 | 8.06.E-48 | 33128 | A_09_P011276 | -1.228 | 3.13.E-03 | 4.11.E-02 |
|         |                    |        |           |           | 7429  | A_09_P041496 | -1.579 | 6.38.E-04 | 1.94.E-02 |
| Brd     | CG3096_ESCL2_181   | -4.295 | 2.09.E-37 | 4.51.E-33 | 45209 | A_09_P041496 | -1.526 | 4.21.E-04 | 1.58.E-02 |
|         |                    |        |           |           | 7429  | A_09_P041496 | -1.579 | 6.38.E-04 | 1.94.E-02 |
| bru-2   | CG31761_ESCL1_3516 | -3.249 | 2.47.E-24 | 4.77.E-20 | 45209 | A_09_P041496 | -1.526 | 4.21.E-04 | 1.58.E-02 |
|         |                    |        |           |           | 21208 | A_09_P056661 | -1.343 | 3.48.E-03 | 4.31.E-02 |
| bru-2   | CG31761_ESCL3_2123 | -1.062 | 6.40.E-13 | 1.03.E-08 | 4274  | A_09_P056661 | -1.241 | 3.14.E-03 | 4.11.E-02 |
|         |                    |        |           |           | 20031 | A_09_P226000 | -0.848 | 2.78.E-03 | 3.91.E-02 |
| Calx    | CG5685_ESCL3_3643  | -2.128 | 1.68.E-19 | 3.05.E-15 | 21208 | A_09_P056661 | -1.343 | 3.48.E-03 | 4.31.E-02 |
|         |                    |        |           |           | 4274  | A_09_P056661 | -1.241 | 3.14.E-03 | 4.11.E-02 |
| CBP     | CG1435_ESCL1_1982  | -3.370 | 2.17.E-50 | 4.85.E-46 | 20031 | A_09_P226000 | -0.848 | 2.78.E-03 | 3.91.E-02 |
|         |                    |        |           |           | 38079 | A_09_P051221 | -1.208 | 3.18.E-03 | 4.15.E-02 |
| CBP     | CG1435_ESCL2_820   | -2.205 | 2.34.E-43 | 5.17.E-39 | 10636 | A_09_P106320 | -1.386 | 1.61.E-04 | 1.08.E-02 |
|         |                    |        |           |           | 10636 | A_09_P106320 | -1.386 | 1.61.E-04 | 1.08.E-02 |
| CG10082 | CG10082_ESCL1_3396 | -1.162 | 5.53.E-30 | 1.13.E-25 | 17141 | A_09_P109995 | -1.201 | 1.71.E-03 | 3.20.E-02 |
|         |                    |        |           |           | 16771 | A_09_P026136 | -1.098 | 1.81.E-03 | 3.24.E-02 |
| CG10082 | CG10082_ESCL2_2614 | -0.550 | 1.45.E-10 | 2.18.E-06 | 17141 | A_09_P109995 | -1.201 | 1.71.E-03 | 3.20.E-02 |
|         |                    |        |           |           | 16771 | A_09_P026136 | -1.098 | 1.81.E-03 | 3.24.E-02 |
| CG10176 | CG10176_ESCL1_1652 | -1.519 | 7.50.E-23 | 1.42.E-18 | 2508  | A_09_P023131 | -1.008 | 3.70.E-03 | 4.46.E-02 |
|         |                    |        |           |           | 2508  | A_09_P023131 | -1.008 | 3.70.E-03 | 4.46.E-02 |
| CG10176 | CG10176_ESCL2_644  | -2.293 | 9.93.E-28 | 1.99.E-23 | 37635 | A_09_P072866 | -1.291 | 2.66.E-04 | 1.31.E-02 |
|         |                    |        |           |           | 37635 | A_09_P072866 | -1.291 | 2.66.E-04 | 1.31.E-02 |
| CG11033 | CG11033_ESCL1_5185 | -0.775 | 3.46.E-21 | 6.44.E-17 | 36960 | A_09_P072866 | -1.278 | 2.52.E-04 | 1.29.E-02 |
|         |                    |        |           |           | 19971 | A_09_P036191 | -1.453 | 6.24.E-04 | 1.92.E-02 |
| CG1124  | CG1124_ESCL2_620   | -0.895 | 2.52.E-11 | 3.88.E-07 | 16210 | A_09_P026356 | -1.720 | 1.32.E-04 | 1.02.E-02 |
|         |                    |        |           |           | 16210 | A_09_P026356 | -1.720 | 1.32.E-04 | 1.02.E-02 |
| CG11275 | CG11275_ESCL1_1180 | -1.937 | 1.65.E-18 | 2.95.E-14 | 26498 | A_09_P026356 | -1.585 | 1.54.E-04 | 1.07.E-02 |
|         |                    |        |           |           | 34645 | A_09_P052686 | -3.382 | 3.36.E-06 | 5.81.E-03 |
| CG11347 | CG11347_ESCL1_1994 | -2.710 | 3.57.E-36 | 7.67.E-32 | 43192 | A_09_P052686 | -3.238 | 7.97.E-06 | 5.81.E-03 |
|         |                    |        |           |           | 34645 | A_09_P052686 | -3.382 | 3.36.E-06 | 5.81.E-03 |
| CG11347 | CG11347_ESCL2_984  | -2.506 | 2.52.E-33 | 5.31.E-29 | 43192 | A_09_P052686 | -3.238 | 7.97.E-06 | 5.81.E-03 |
|         |                    |        |           |           | 43192 | A_09_P052686 | -3.238 | 7.97.E-06 | 5.81.E-03 |
| CG11825 | CG11825_ESCL1_437  | -0.519 | 1.88.E-08 | 2.64.E-04 | 43977 | A_09_P107930 | -1.489 | 2.30.E-04 | 1.25.E-02 |
|         |                    |        |           |           | 25124 | A_09_P006106 | -1.384 | 1.81.E-04 | 1.14.E-02 |
| CG11825 | CG11825_ESCL2_45   | -0.442 | 3.03.E-08 | 4.23.E-04 | 9572  | A_09_P176590 | -1.182 | 2.55.E-03 | 3.77.E-02 |
|         |                    |        |           |           | 43977 | A_09_P107930 | -1.489 | 2.30.E-04 | 1.25.E-02 |
| CG12171 | CG12171_ESCL1_939  | -1.456 | 1.81.E-24 | 3.51.E-20 | 25124 | A_09_P006106 | -1.384 | 1.81.E-04 | 1.14.E-02 |
|         |                    |        |           |           | 9572  | A_09_P176590 | -1.182 | 2.55.E-03 | 3.77.E-02 |
| CG12171 | CG12171_ESCL2_449  | -0.798 | 5.21.E-18 | 9.25.E-14 | 36148 | A_09_P036451 | -1.271 | 2.15.E-03 | 3.54.E-02 |
|         |                    |        |           |           | 35902 | A_09_P036451 | -1.244 | 1.81.E-03 | 3.24.E-02 |
| CG12262 | CG12262_ESCL1_1183 | -1.645 | 2.34.E-43 | 5.18.E-39 | 36148 | A_09_P036451 | -1.271 | 2.15.E-03 | 3.54.E-02 |
|         |                    |        |           |           | 35902 | A_09_P036451 | -1.244 | 1.81.E-03 | 3.24.E-02 |
| CG12420 | CG12420_ESCL1_419  | -2.090 | 2.20.E-33 | 4.64.E-29 | 39508 | A_09_P053671 | -1.010 | 9.72.E-04 | 2.40.E-02 |
|         |                    |        |           |           | 21243 | A_09_P053671 | -0.949 | 1.35.E-03 | 2.82.E-02 |
| CG12512 | CG12512_ESCL1_1685 | -0.885 | 2.08.E-17 | 3.66.E-13 | 42252 | A_09_P073411 | -1.631 | 2.53.E-04 | 1.29.E-02 |
|         |                    |        |           |           | 4402  | A_09_P073411 | -1.115 | 1.72.E-03 | 3.20.E-02 |
| CG12581 | CG12581_ESCL1_2963 | -3.767 | 2.19.E-55 | 4.92.E-51 | 27977 | A_09_P217695 | -0.857 | 2.66.E-03 | 3.83.E-02 |
|         |                    |        |           |           | 4762  | A_09_P019566 | -1.572 | 2.43.E-04 | 1.26.E-02 |
| CG12581 | CG12581_ESCL2_1837 | -2.534 | 7.52.E-40 | 1.64.E-35 | 24972 | A_09_P019566 | -1.028 | 4.56.E-03 | 4.94.E-02 |
|         |                    |        |           |           | 6222  | A_09_P035926 | -1.503 | 3.26.E-03 | 4.20.E-02 |
| CG12730 | CG12730_ESCL2_357  | -0.865 | 2.48.E-12 | 3.92.E-08 | 6222  | A_09_P035926 | -1.503 | 3.26.E-03 | 4.20.E-02 |
|         |                    |        |           |           | 12559 | A_09_P067256 | -1.531 | 1.80.E-04 | 1.14.E-02 |
|         |                    |        |           |           | 31911 | A_09_P067256 | -1.511 | 6.62.E-04 | 1.97.E-02 |
|         |                    |        |           |           | 10927 | A_09_P067256 | -1.503 | 9.48.E-04 | 2.36.E-02 |
|         |                    |        |           |           | 26014 | A_09_P067256 | -1.499 | 1.10.E-03 | 2.55.E-02 |
|         |                    |        |           |           | 21173 | A_09_P067256 | -1.485 | 3.93.E-04 | 1.54.E-02 |
|         |                    |        |           |           | 9464  | A_09_P067256 | -1.451 | 6.83.E-04 | 2.01.E-02 |
|         |                    |        |           |           | 41888 | A_09_P067256 | -1.340 | 8.56.E-04 | 2.25.E-02 |

|         |                    |        |           |           |       |              |        |           |           |
|---------|--------------------|--------|-----------|-----------|-------|--------------|--------|-----------|-----------|
|         |                    |        |           |           | 25527 | A_09_P067256 | -1.330 | 6.61.E-04 | 1.97.E-02 |
|         |                    |        |           |           | 34019 | A_09_P067256 | -1.304 | 1.02.E-03 | 2.45.E-02 |
|         |                    |        |           |           | 5280  | A_09_P067256 | -1.228 | 9.76.E-04 | 2.40.E-02 |
| CG12768 | CG12768_ESCL2_1200 | -0.988 | 3.38.E-16 | 5.81.E-12 | 37853 | A_09_P035906 | -2.684 | 7.21.E-05 | 8.48.E-03 |
|         |                    |        |           |           | 31874 | A_09_P035906 | -2.269 | 1.29.E-04 | 1.01.E-02 |
|         |                    |        |           |           | 17076 | A_09_P127480 | -2.247 | 1.30.E-04 | 1.01.E-02 |
| CG12814 | CG12814_ESCL1_440  | -1.022 | 9.68.E-13 | 1.55.E-08 | 36279 | A_09_P073406 | -1.852 | 3.12.E-03 | 4.11.E-02 |
|         |                    |        |           |           | 20668 | A_09_P217690 | -0.890 | 1.87.E-03 | 3.30.E-02 |
| CG12814 | CG12814_ESCL2_6590 | -0.973 | 2.47.E-09 | 3.57.E-05 | 36279 | A_09_P073406 | -1.852 | 3.12.E-03 | 4.11.E-02 |
|         |                    |        |           |           | 20668 | A_09_P217690 | -0.890 | 1.87.E-03 | 3.30.E-02 |
| CG12896 | CG12896_ESCL1_561  | -2.842 | 3.76.E-45 | 8.34.E-41 | 13280 | A_09_P006111 | -1.381 | 5.17.E-04 | 1.75.E-02 |
| CG13004 | CG13004_ESCL1_866  | -0.592 | 3.48.E-12 | 5.48.E-08 | 11377 | A_09_P039601 | -1.910 | 6.99.E-04 | 2.02.E-02 |
|         |                    |        |           |           | 27472 | A_09_P193025 | -1.599 | 2.13.E-03 | 3.51.E-02 |
| CG13252 | CG13252_ESCL1_2388 | -1.550 | 7.14.E-26 | 1.40.E-21 | 35449 | A_09_P035206 | -2.541 | 4.21.E-03 | 4.73.E-02 |
|         |                    |        |           |           | 27084 | A_09_P035206 | -1.869 | 4.09.E-04 | 1.57.E-02 |
| CG13506 | CG13506_ESCL1_2781 | -3.462 | 1.04.E-26 | 2.07.E-22 | 25461 | A_09_P026436 | -0.733 | 4.02.E-03 | 4.63.E-02 |
| CG13868 | CG13868_ESCL1_3771 | -1.096 | 1.69.E-11 | 2.61.E-07 | 10349 | A_09_P025661 | -3.214 | 2.29.E-05 | 6.66.E-03 |
|         |                    |        |           |           | 4276  | A_09_P025661 | -2.973 | 1.18.E-05 | 5.94.E-03 |
| CG13868 | CG13868_ESCL2_989  | -1.212 | 4.34.E-09 | 6.24.E-05 | 10349 | A_09_P025661 | -3.214 | 2.29.E-05 | 6.66.E-03 |
|         |                    |        |           |           | 4276  | A_09_P025661 | -2.973 | 1.18.E-05 | 5.94.E-03 |
| CG13868 | CG13868_ESCL3_2697 | -1.591 | 4.73.E-24 | 9.13.E-20 | 10349 | A_09_P025661 | -3.214 | 2.29.E-05 | 6.66.E-03 |
|         |                    |        |           |           | 4276  | A_09_P025661 | -2.973 | 1.18.E-05 | 5.94.E-03 |
| CG13928 | CG13928_ESCL1_2446 | -1.206 | 9.20.E-23 | 1.75.E-18 | 34987 | A_09_P028391 | -1.388 | 1.11.E-03 | 2.56.E-02 |
| CG14253 | CG14253_ESCL1_1747 | -1.972 | 1.11.E-21 | 2.08.E-17 | 32595 | A_09_P185065 | -0.813 | 2.87.E-03 | 3.97.E-02 |
| CG14253 | CG14253_ESCL2_970  | -1.003 | 2.08.E-10 | 3.12.E-06 | 32595 | A_09_P185065 | -0.813 | 2.87.E-03 | 3.97.E-02 |
| CG14915 | CG14915_ESCL1_269  | -4.216 | 5.20.E-55 | 1.17.E-50 | 14177 | A_09_P217065 | -1.324 | 8.24.E-04 | 2.20.E-02 |
|         |                    |        |           |           | 23204 | A_09_P021896 | -1.221 | 9.92.E-04 | 2.42.E-02 |
|         |                    |        |           |           | 14166 | A_09_P021896 | -1.097 | 6.04.E-04 | 1.90.E-02 |
| CG14937 | CG14937_ESCL1_1377 | -1.025 | 4.64.E-21 | 8.63.E-17 | 28453 | A_09_P022071 | -1.371 | 5.00.E-04 | 1.71.E-02 |
|         |                    |        |           |           | 21725 | A_09_P022071 | -1.221 | 7.18.E-04 | 2.05.E-02 |
| CG14937 | CG14937_ESCL2_1269 | -1.476 | 1.43.E-23 | 2.74.E-19 | 28453 | A_09_P022071 | -1.371 | 5.00.E-04 | 1.71.E-02 |
|         |                    |        |           |           | 21725 | A_09_P022071 | -1.221 | 7.18.E-04 | 2.05.E-02 |
| CG14968 | CG14968_ESCL1_847  | -0.851 | 4.36.E-12 | 6.84.E-08 | 15551 | A_09_P029061 | -0.802 | 4.48.E-03 | 4.89.E-02 |
| CG14968 | CG14968_ESCL2_504  | -0.388 | 3.38.E-06 | 4.32.E-02 | 15551 | A_09_P029061 | -0.802 | 4.48.E-03 | 4.89.E-02 |
| CG15479 | CG15479_ESCL1_548  | -3.639 | 4.23.E-35 | 9.02.E-31 | 4850  | A_09_P022531 | -2.499 | 1.15.E-05 | 5.91.E-03 |
|         |                    |        |           |           | 19585 | A_09_P022531 | -2.468 | 2.98.E-05 | 7.10.E-03 |
|         |                    |        |           |           | 9107  | A_09_P022531 | -2.466 | 9.88.E-06 | 5.81.E-03 |
|         |                    |        |           |           | 43269 | A_09_P022531 | -2.449 | 3.19.E-04 | 1.44.E-02 |
|         |                    |        |           |           | 45086 | A_09_P022531 | -2.411 | 8.68.E-06 | 5.81.E-03 |
|         |                    |        |           |           | 20858 | A_09_P022531 | -2.366 | 1.08.E-04 | 9.43.E-03 |
|         |                    |        |           |           | 12087 | A_09_P022531 | -2.223 | 1.23.E-04 | 9.98.E-03 |
|         |                    |        |           |           | 36112 | A_09_P022531 | -2.114 | 4.01.E-05 | 7.50.E-03 |
|         |                    |        |           |           | 16017 | A_09_P022531 | -2.016 | 1.93.E-04 | 1.17.E-02 |
|         |                    |        |           |           | 33318 | A_09_P022531 | -1.997 | 8.61.E-05 | 8.82.E-03 |
| CG15658 | CG15658_ESCL1_1526 | -1.721 | 5.29.E-26 | 1.04.E-21 | 10894 | A_09_P026011 | -1.107 | 1.52.E-03 | 3.00.E-02 |
|         |                    |        |           |           | 41168 | A_09_P026011 | -1.059 | 2.21.E-03 | 3.59.E-02 |
| CG1600  | CG1600_ESCL1_1833  | -2.017 | 1.08.E-30 | 2.22.E-26 | 7214  | A_09_P024801 | -1.099 | 1.29.E-03 | 2.75.E-02 |
| CG1600  | CG1600_ESCL2_1079  | -1.208 | 3.07.E-17 | 5.38.E-13 | 7214  | A_09_P024801 | -1.099 | 1.29.E-03 | 2.75.E-02 |
| CG16791 | CG16791_ESCL1_4632 | -2.344 | 2.61.E-32 | 5.46.E-28 | 17496 | A_09_P175930 | -0.894 | 1.62.E-03 | 3.09.E-02 |
| CG16791 | CG16791_ESCL2_3193 | -1.922 | 1.14.E-27 | 2.29.E-23 | 17496 | A_09_P175930 | -0.894 | 1.62.E-03 | 3.09.E-02 |
| CG17181 | CG17181_ESCL1_1242 | -0.613 | 1.09.E-07 | 1.49.E-03 | 12550 | A_09_P214545 | -1.060 | 9.76.E-04 | 2.40.E-02 |
|         |                    |        |           |           | 31575 | A_09_P028011 | -1.052 | 4.14.E-03 | 4.69.E-02 |
| CG17211 | CG17211_ESCL1_3981 | -1.229 | 2.20.E-20 | 4.06.E-16 | 11391 | A_09_P022226 | -2.032 | 3.81.E-03 | 4.49.E-02 |
|         |                    |        |           |           | 16398 | A_09_P022226 | -1.921 | 3.98.E-03 | 4.61.E-02 |
| CG17278 | CG17278_ESCL1_1815 | -1.907 | 9.77.E-13 | 1.56.E-08 | 34660 | A_09_P202905 | -2.343 | 4.28.E-05 | 7.50.E-03 |
|         |                    |        |           |           | 10810 | A_09_P057171 | -1.481 | 5.79.E-04 | 1.85.E-02 |
| CG17278 | CG17278_ESCL2_178  | -1.920 | 1.43.E-23 | 2.74.E-19 | 34660 | A_09_P202905 | -2.343 | 4.28.E-05 | 7.50.E-03 |
|         |                    |        |           |           | 10810 | A_09_P057171 | -1.481 | 5.79.E-04 | 1.85.E-02 |
| CG17321 | CG17321_ESCL1_1921 | -2.610 | 1.23.E-13 | 2.00.E-09 | 13542 | A_09_P023256 | -0.817 | 2.60.E-03 | 3.80.E-02 |
| CG17323 | CG17323_ESCL2_1422 | -0.449 | 1.31.E-08 | 1.85.E-04 | 38180 | A_09_P023241 | -1.282 | 2.80.E-03 | 3.93.E-02 |
| CG17574 | CG17574_ESCL1_1050 | -1.547 | 2.66.E-31 | 5.51.E-27 | 17747 | A_09_P007071 | -0.839 | 2.27.E-03 | 3.60.E-02 |
| CG17574 | CG17574_ESCL2_407  | -0.727 | 2.70.E-12 | 4.26.E-08 | 17747 | A_09_P007071 | -0.839 | 2.27.E-03 | 3.60.E-02 |
| CG18542 | CG18542_ESCL1_1132 | -0.635 | 5.56.E-12 | 8.69.E-08 | 9518  | A_09_P133175 | -0.820 | 3.57.E-03 | 4.37.E-02 |
| CG2016  | CG2016_ESCL1_656   | -2.557 | 1.51.E-29 | 3.07.E-25 | 25799 | A_09_P187190 | -1.458 | 3.26.E-03 | 4.20.E-02 |
| CG3097  | CG3097_ESCL1_1891  | -1.089 | 4.23.E-18 | 7.53.E-14 | 42288 | A_09_P067346 | -1.161 | 7.96.E-04 | 2.16.E-02 |
| CG3097  | CG3097_ESCL2_1181  | -2.844 | 1.87.E-41 | 4.11.E-37 | 42288 | A_09_P067346 | -1.161 | 7.96.E-04 | 2.16.E-02 |
| CG31140 | CG31140_ESCL1_6642 | -0.946 | 2.66.E-09 | 3.86.E-05 | 18699 | A_09_P204740 | -1.424 | 2.83.E-03 | 3.95.E-02 |
| CG31300 | CG31300_ESCL1_1187 | -2.284 | 2.98.E-27 | 5.94.E-23 | 11284 | A_09_P059556 | -1.192 | 2.48.E-03 | 3.72.E-02 |
| CG31300 | CG31300_ESCL2_1294 | -1.988 | 6.69.E-15 | 1.12.E-10 | 11284 | A_09_P059556 | -1.192 | 2.48.E-03 | 3.72.E-02 |

|         |                    |        |           |           |       |              |        |           |           |
|---------|--------------------|--------|-----------|-----------|-------|--------------|--------|-----------|-----------|
| CG31522 | CG31522_ESCL1_2591 | -2.184 | 7.88.E-35 | 1.68.E-30 | 40582 | A_09_P109805 | -1.193 | 4.77.E-04 | 1.68.E-02 |
| CG32264 | CG32264_ESCL1_3701 | -0.888 | 4.20.E-13 | 6.77.E-09 | 20465 | A_09_P185580 | -1.157 | 1.57.E-03 | 3.04.E-02 |
|         |                    |        |           |           | 33561 | A_09_P193010 | -0.852 | 2.45.E-03 | 3.69.E-02 |
| CG32264 | CG32264_ESCL2_2741 | -0.989 | 8.26.E-18 | 1.46.E-13 | 20465 | A_09_P185580 | -1.157 | 1.57.E-03 | 3.04.E-02 |
|         |                    |        |           |           | 33561 | A_09_P193010 | -0.852 | 2.45.E-03 | 3.69.E-02 |
| CG32638 | CG32638_ESCL1_1194 | -2.139 | 4.96.E-33 | 1.04.E-28 | 25989 | A_09_P016031 | -1.114 | 4.73.E-04 | 1.67.E-02 |
|         |                    |        |           |           | 20854 | A_09_P016031 | -0.932 | 1.34.E-03 | 2.82.E-02 |
| CG32638 | CG32638_ESCL2_210  | -0.944 | 6.27.E-19 | 1.13.E-14 | 25989 | A_09_P016031 | -1.114 | 4.73.E-04 | 1.67.E-02 |
|         |                    |        |           |           | 20854 | A_09_P016031 | -0.932 | 1.34.E-03 | 2.82.E-02 |
| CG34383 | CG14365_ESCL1_4382 | -0.797 | 6.25.E-08 | 8.62.E-04 | 36656 | A_09_P206085 | -1.450 | 3.48.E-04 | 1.46.E-02 |
|         |                    |        |           |           | 11257 | A_09_P171405 | -1.235 | 7.54.E-04 | 2.10.E-02 |
|         |                    |        |           |           | 30729 | A_09_P129800 | -0.950 | 1.44.E-03 | 2.91.E-02 |
|         |                    |        |           |           | 18761 | A_09_P004086 | -0.925 | 1.20.E-03 | 2.66.E-02 |
| CG34383 | CG9322_ESCL1_2921  | -2.759 | 5.44.E-35 | 1.16.E-30 | 36656 | A_09_P206085 | -1.450 | 3.48.E-04 | 1.46.E-02 |
|         |                    |        |           |           | 11257 | A_09_P171405 | -1.235 | 7.54.E-04 | 2.10.E-02 |
|         |                    |        |           |           | 30729 | A_09_P129800 | -0.950 | 1.44.E-03 | 2.91.E-02 |
|         |                    |        |           |           | 18761 | A_09_P004086 | -0.925 | 1.20.E-03 | 2.66.E-02 |
| CG34383 | CG9322_ESCL2_2392  | -2.300 | 2.56.E-34 | 5.42.E-30 | 36656 | A_09_P206085 | -1.450 | 3.48.E-04 | 1.46.E-02 |
|         |                    |        |           |           | 11257 | A_09_P171405 | -1.235 | 7.54.E-04 | 2.10.E-02 |
|         |                    |        |           |           | 30729 | A_09_P129800 | -0.950 | 1.44.E-03 | 2.91.E-02 |
|         |                    |        |           |           | 18761 | A_09_P004086 | -0.925 | 1.20.E-03 | 2.66.E-02 |
| CG3624  | CG3624_ESCL1_978   | -1.541 | 1.21.E-17 | 2.14.E-13 | 33714 | A_09_P026441 | -1.313 | 8.98.E-04 | 2.30.E-02 |
|         |                    |        |           |           | 18220 | A_09_P026441 | -1.137 | 2.38.E-03 | 3.66.E-02 |
|         |                    |        |           |           | 43123 | A_09_P206660 | -0.796 | 3.44.E-03 | 4.29.E-02 |
| CG3624  | CG3624_ESCL2_323   | -1.314 | 1.36.E-15 | 2.31.E-11 | 33714 | A_09_P026441 | -1.313 | 8.98.E-04 | 2.30.E-02 |
|         |                    |        |           |           | 18220 | A_09_P026441 | -1.137 | 2.38.E-03 | 3.66.E-02 |
|         |                    |        |           |           | 43123 | A_09_P206660 | -0.796 | 3.44.E-03 | 4.29.E-02 |
| CG3835  | CG3835_ESCL1_1522  | -0.449 | 2.09.E-06 | 2.69.E-02 | 27514 | A_09_P076456 | -3.092 | 1.24.E-05 | 6.01.E-03 |
|         |                    |        |           |           | 37933 | A_09_P076456 | -3.003 | 4.92.E-06 | 5.81.E-03 |
| CG3842  | CG3842_ESCL1_1157  | -1.727 | 8.04.E-25 | 1.56.E-20 | 30715 | A_09_P067601 | -0.875 | 2.55.E-03 | 3.77.E-02 |
| CG4115  | CG4115_ESCL1_958   | -2.095 | 5.19.E-33 | 1.09.E-28 | 9645  | A_09_P074276 | -1.513 | 6.47.E-04 | 1.96.E-02 |
| CG4115  | CG4115_ESCL2_562   | -2.914 | 1.30.E-31 | 2.70.E-27 | 9645  | A_09_P074276 | -1.513 | 6.47.E-04 | 1.96.E-02 |
| CG4164  | CG4164_ESCL1_1406  | -1.386 | 3.11.E-22 | 5.87.E-18 | 34306 | A_09_P017961 | -0.872 | 3.73.E-03 | 4.46.E-02 |
| CG4164  | CG4164_ESCL2_967   | -0.952 | 3.00.E-35 | 6.40.E-31 | 34306 | A_09_P017961 | -0.872 | 3.73.E-03 | 4.46.E-02 |
| CG42358 | CG5558_ESCL1_1178  | -0.303 | 7.52.E-07 | 9.90.E-03 | 17005 | A_09_P069126 | -1.866 | 4.12.E-05 | 7.50.E-03 |
|         |                    |        |           |           | 20366 | A_09_P069126 | -1.785 | 3.69.E-05 | 7.50.E-03 |
| CG42663 | CG12488_ESCL2_1441 | -1.207 | 1.74.E-14 | 2.88.E-10 | 904   | A_09_P209265 | -1.165 | 1.24.E-03 | 2.70.E-02 |
| CG43340 | CG30492_ESCL1_3837 | -0.727 | 1.61.E-08 | 2.27.E-04 | 22520 | A_09_P079786 | -0.995 | 1.60.E-03 | 3.07.E-02 |
|         |                    |        |           |           | 32131 | A_09_P079786 | -0.933 | 1.93.E-03 | 3.36.E-02 |
| CG43340 | CG30492_ESCL2_3741 | -1.460 | 7.46.E-31 | 1.54.E-26 | 22520 | A_09_P079786 | -0.995 | 1.60.E-03 | 3.07.E-02 |
|         |                    |        |           |           | 32131 | A_09_P079786 | -0.933 | 1.93.E-03 | 3.36.E-02 |
| CG43340 | CG30492_ESCL3_2753 | -1.293 | 3.51.E-25 | 6.85.E-21 | 22520 | A_09_P079786 | -0.995 | 1.60.E-03 | 3.07.E-02 |
|         |                    |        |           |           | 32131 | A_09_P079786 | -0.933 | 1.93.E-03 | 3.36.E-02 |
| CG4455  | CG4455_ESCL1_1333  | -2.883 | 2.61.E-53 | 5.86.E-49 | 41762 | A_09_P065241 | -1.100 | 2.60.E-03 | 3.80.E-02 |
| CG4455  | CG4455_ESCL2_315   | -0.354 | 1.74.E-06 | 2.25.E-02 | 41762 | A_09_P065241 | -1.100 | 2.60.E-03 | 3.80.E-02 |
| CG4688  | CG4688_ESCL1_934   | -1.391 | 8.42.E-13 | 1.35.E-08 | 22304 | A_09_P151205 | -1.418 | 1.58.E-03 | 3.05.E-02 |
| CG4688  | CG4688_ESCL2_398   | -1.063 | 2.61.E-12 | 4.12.E-08 | 22304 | A_09_P151205 | -1.418 | 1.58.E-03 | 3.05.E-02 |
| CG5059  | CG5059_ESCL1_1639  | -0.943 | 1.96.E-17 | 3.46.E-13 | 38442 | A_09_P035161 | -1.196 | 5.00.E-04 | 1.71.E-02 |
| CG5059  | CG5059_ESCL2_541   | -0.870 | 1.39.E-18 | 2.50.E-14 | 38442 | A_09_P035161 | -1.196 | 5.00.E-04 | 1.71.E-02 |
| CG5455  | CG5455_ESCL1_2739  | -2.684 | 4.47.E-32 | 9.33.E-28 | 8374  | A_09_P071986 | -1.106 | 1.75.E-03 | 3.20.E-02 |
|         |                    |        |           |           | 7792  | A_09_P071986 | -1.057 | 1.37.E-03 | 2.83.E-02 |
| CG5455  | CG5455_ESCL2_1993  | -1.882 | 1.17.E-20 | 2.16.E-16 | 8374  | A_09_P071986 | -1.106 | 1.75.E-03 | 3.20.E-02 |
|         |                    |        |           |           | 7792  | A_09_P071986 | -1.057 | 1.37.E-03 | 2.83.E-02 |
| CG5707  | CG5707_ESCL1_1393  | -3.127 | 1.07.E-33 | 2.25.E-29 | 19040 | A_09_P078761 | -1.098 | 3.78.E-03 | 4.48.E-02 |
|         |                    |        |           |           | 17610 | A_09_P078761 | -1.029 | 3.28.E-03 | 4.20.E-02 |
| CG5707  | CG5707_ESCL2_981   | -0.498 | 7.82.E-07 | 1.03.E-02 | 19040 | A_09_P078761 | -1.098 | 3.78.E-03 | 4.48.E-02 |
|         |                    |        |           |           | 17610 | A_09_P078761 | -1.029 | 3.28.E-03 | 4.20.E-02 |
| CG5835  | CG11779_ESCL3_2331 | -0.977 | 3.71.E-12 | 5.84.E-08 | 35390 | A_09_P069116 | -1.141 | 5.70.E-04 | 1.84.E-02 |
|         |                    |        |           |           | 23378 | A_09_P069106 | -1.128 | 4.32.E-04 | 1.61.E-02 |
| CG5835  | CG5835_ESCL1_1255  | -0.843 | 1.74.E-11 | 2.69.E-07 | 35390 | A_09_P069116 | -1.141 | 5.70.E-04 | 1.84.E-02 |
|         |                    |        |           |           | 23378 | A_09_P069106 | -1.128 | 4.32.E-04 | 1.61.E-02 |
| CG5869  | CG5869_ESCL1_809   | -1.461 | 3.15.E-25 | 6.16.E-21 | 13602 | A_09_P065986 | -0.775 | 3.73.E-03 | 4.46.E-02 |
|         |                    |        |           |           | 6974  | A_09_P065986 | -0.757 | 3.96.E-03 | 4.59.E-02 |
| CG5869  | CG5869_ESCL2_240   | -1.137 | 3.37.E-25 | 6.57.E-21 | 13602 | A_09_P065986 | -0.775 | 3.73.E-03 | 4.46.E-02 |
|         |                    |        |           |           | 6974  | A_09_P065986 | -0.757 | 3.96.E-03 | 4.59.E-02 |
| CG6024  | CG6024_ESCL1_4020  | -0.619 | 2.01.E-07 | 2.71.E-03 | 781   | A_09_P055081 | -2.308 | 2.97.E-04 | 1.37.E-02 |
| CG6045  | CG6045_ESCL1_3692  | -0.555 | 1.29.E-09 | 1.88.E-05 | 6034  | A_09_P075516 | -1.226 | 1.74.E-03 | 3.20.E-02 |
|         |                    |        |           |           | 21393 | A_09_P075516 | -1.154 | 1.54.E-03 | 3.02.E-02 |
| CG6206  | CG6206_ESCL1_3146  | -1.484 | 2.28.E-36 | 4.89.E-32 | 37642 | A_09_P079826 | -1.519 | 1.02.E-03 | 2.45.E-02 |

|        |                    |        |           |           |       |              |        |           |           |
|--------|--------------------|--------|-----------|-----------|-------|--------------|--------|-----------|-----------|
| CG6231 | CG6231_ESCL1_2874  | -0.433 | 1.07.E-07 | 1.46.E-03 | 9422  | A_09_P148150 | -1.333 | 1.51.E-03 | 3.00.E-02 |
| CG6231 | CG6231_ESCL2_1692  | -1.250 | 4.24.E-20 | 7.78.E-16 | 9422  | A_09_P148150 | -1.333 | 1.51.E-03 | 3.00.E-02 |
| CG6329 | CG6329_ESCL1_2566  | -1.183 | 1.67.E-10 | 2.52.E-06 | 37001 | A_09_P007421 | -0.920 | 2.25.E-03 | 3.60.E-02 |
|        |                    |        |           |           | 6315  | A_09_P007421 | -0.795 | 4.48.E-03 | 4.89.E-02 |
| CG6329 | CG6329_ESCL2_974   | -0.937 | 6.72.E-11 | 1.02.E-06 | 37001 | A_09_P007421 | -0.920 | 2.25.E-03 | 3.60.E-02 |
|        |                    |        |           |           | 6315  | A_09_P007421 | -0.795 | 4.48.E-03 | 4.89.E-02 |
| CG6329 | CG6329_ESCL3_261   | -0.829 | 1.73.E-17 | 3.05.E-13 | 37001 | A_09_P007421 | -0.920 | 2.25.E-03 | 3.60.E-02 |
|        |                    |        |           |           | 6315  | A_09_P007421 | -0.795 | 4.48.E-03 | 4.89.E-02 |
| CG6330 | CG6330_ESCL1_1581  | -3.251 | 3.11.E-53 | 6.99.E-49 | 2632  | A_09_P072126 | -2.942 | 1.87.E-04 | 1.16.E-02 |
|        |                    |        |           |           | 19820 | A_09_P072126 | -2.828 | 1.68.E-04 | 1.11.E-02 |
| CG6330 | CG6330_ESCL2_902   | -1.870 | 1.08.E-37 | 2.33.E-33 | 2632  | A_09_P072126 | -2.942 | 1.87.E-04 | 1.16.E-02 |
|        |                    |        |           |           | 19820 | A_09_P072126 | -2.828 | 1.68.E-04 | 1.11.E-02 |
| CG6356 | CG6356_ESCL1_1602  | -0.947 | 4.44.E-17 | 7.76.E-13 | 8838  | A_09_P071031 | -1.208 | 3.27.E-04 | 1.45.E-02 |
|        |                    |        |           |           | 43638 | A_09_P071031 | -0.977 | 1.32.E-03 | 2.79.E-02 |
| CG6356 | CG6356_ESCL2_2471  | -1.865 | 7.33.E-13 | 1.18.E-08 | 8838  | A_09_P071031 | -1.208 | 3.27.E-04 | 1.45.E-02 |
|        |                    |        |           |           | 43638 | A_09_P071031 | -0.977 | 1.32.E-03 | 2.79.E-02 |
| CG6520 | CG6520_ESCL1_759   | -4.121 | 1.22.E-45 | 2.71.E-41 | 6972  | A_09_P008696 | -1.189 | 3.41.E-03 | 4.28.E-02 |
|        |                    |        |           |           | 11212 | A_09_P008696 | -0.740 | 3.93.E-03 | 4.58.E-02 |
| CG6520 | CG6520_ESCL2_459   | -3.179 | 3.90.E-42 | 8.59.E-38 | 6972  | A_09_P008696 | -1.189 | 3.41.E-03 | 4.28.E-02 |
|        |                    |        |           |           | 11212 | A_09_P008696 | -0.740 | 3.93.E-03 | 4.58.E-02 |
| CG7407 | CG7407_ESCL1_863   | -0.596 | 2.73.E-11 | 4.20.E-07 | 4134  | A_09_P035646 | -0.867 | 2.49.E-03 | 3.73.E-02 |
| CG7407 | CG7407_ESCL2_427   | -0.380 | 1.85.E-06 | 2.39.E-02 | 4134  | A_09_P035646 | -0.867 | 2.49.E-03 | 3.73.E-02 |
| CG7560 | CG7560_ESCL1_961   | -0.627 | 2.93.E-09 | 4.23.E-05 | 10775 | A_09_P054921 | -1.239 | 4.98.E-04 | 1.71.E-02 |
| CG7884 | CG7884_ESCL1_3848  | -4.317 | 3.82.E-40 | 8.35.E-36 | 5576  | A_09_P040416 | -1.962 | 6.94.E-04 | 2.02.E-02 |
|        |                    |        |           |           | 12776 | A_09_P040416 | -1.942 | 2.91.E-04 | 1.36.E-02 |
| CG8398 | CG8398_ESCL1_1865  | -2.907 | 5.33.E-25 | 1.04.E-20 | 28214 | A_09_P053301 | -1.028 | 3.20.E-03 | 4.16.E-02 |
| CG8398 | CG8398_ESCL2_1545  | -1.293 | 2.33.E-18 | 4.16.E-14 | 28214 | A_09_P053301 | -1.028 | 3.20.E-03 | 4.16.E-02 |
| CG8420 | CG8420_ESCL1_1495  | -3.090 | 1.60.E-46 | 3.57.E-42 | 10223 | A_09_P072891 | -2.847 | 2.45.E-05 | 6.83.E-03 |
|        |                    |        |           |           | 44215 | A_09_P072891 | -2.835 | 3.85.E-05 | 7.50.E-03 |
| CG8420 | CG8420_ESCL2_1845  | -3.743 | 1.74.E-53 | 3.90.E-49 | 10223 | A_09_P072891 | -2.847 | 2.45.E-05 | 6.83.E-03 |
|        |                    |        |           |           | 44215 | A_09_P072891 | -2.835 | 3.85.E-05 | 7.50.E-03 |
| CG9095 | CG9095_ESCL1_4654  | -2.303 | 1.58.E-27 | 3.16.E-23 | 1736  | A_09_P038876 | -1.409 | 2.74.E-04 | 1.33.E-02 |
|        |                    |        |           |           | 37056 | A_09_P038876 | -0.998 | 3.43.E-03 | 4.28.E-02 |
| CG9095 | CG9095_ESCL2_2693  | -1.270 | 3.97.E-13 | 6.41.E-09 | 1736  | A_09_P038876 | -1.409 | 2.74.E-04 | 1.33.E-02 |
|        |                    |        |           |           | 37056 | A_09_P038876 | -0.998 | 3.43.E-03 | 4.28.E-02 |
| CG9232 | CG9232_ESCL1_981   | -2.840 | 4.07.E-43 | 9.00.E-39 | 29737 | A_09_P020086 | -2.051 | 7.75.E-04 | 2.13.E-02 |
| CG9297 | CG9297_ESCL1_3914  | -0.600 | 1.85.E-07 | 2.50.E-03 | 41692 | A_09_P194255 | -1.369 | 3.47.E-04 | 1.46.E-02 |
| CG9449 | CG9449_ESCL2_1138  | -3.236 | 1.59.E-39 | 3.46.E-35 | 36111 | A_09_P034606 | -2.175 | 4.27.E-03 | 4.76.E-02 |
|        |                    |        |           |           | 34075 | A_09_P034606 | -1.910 | 1.77.E-03 | 3.21.E-02 |
| CG9449 | CG9449_ESCL3_1297  | -2.824 | 6.49.E-37 | 1.40.E-32 | 36111 | A_09_P034606 | -2.175 | 4.27.E-03 | 4.76.E-02 |
|        |                    |        |           |           | 34075 | A_09_P034606 | -1.910 | 1.77.E-03 | 3.21.E-02 |
| CG9894 | CG9894_ESCL1_796   | -3.341 | 1.55.E-29 | 3.16.E-25 | 43374 | A_09_P221985 | -1.196 | 8.47.E-04 | 2.23.E-02 |
|        |                    |        |           |           | 30216 | A_09_P174270 | -1.071 | 2.57.E-03 | 3.78.E-02 |
| CG9894 | CG9894_ESCL2_314   | -3.530 | 9.35.E-52 | 2.10.E-47 | 43374 | A_09_P221985 | -1.196 | 8.47.E-04 | 2.23.E-02 |
|        |                    |        |           |           | 30216 | A_09_P174270 | -1.071 | 2.57.E-03 | 3.78.E-02 |
| cib    | CG4944_ESCL3_312   | -0.321 | 1.75.E-06 | 2.26.E-02 | 43888 | A_09_P078106 | -1.082 | 7.76.E-04 | 2.13.E-02 |
|        |                    |        |           |           | 28795 | A_09_P078106 | -1.038 | 1.21.E-03 | 2.66.E-02 |
|        |                    |        |           |           | 30843 | A_09_P078106 | -1.024 | 1.31.E-03 | 2.77.E-02 |
|        |                    |        |           |           | 13015 | A_09_P078106 | -1.013 | 1.17.E-03 | 2.64.E-02 |
|        |                    |        |           |           | 4534  | A_09_P078106 | -0.991 | 1.45.E-03 | 2.92.E-02 |
|        |                    |        |           |           | 16279 | A_09_P078106 | -0.989 | 1.54.E-03 | 3.02.E-02 |
|        |                    |        |           |           | 28585 | A_09_P078106 | -0.985 | 1.20.E-03 | 2.66.E-02 |
|        |                    |        |           |           | 30477 | A_09_P078106 | -0.980 | 1.26.E-03 | 2.71.E-02 |
|        |                    |        |           |           | 23224 | A_09_P078106 | -0.974 | 1.37.E-03 | 2.83.E-02 |
|        |                    |        |           |           | 17034 | A_09_P078106 | -0.914 | 1.57.E-03 | 3.04.E-02 |
| cora   | CG11949_ESCL1_2820 | -4.114 | 4.42.E-48 | 9.87.E-44 | 38106 | A_09_P012506 | -0.914 | 2.60.E-03 | 3.80.E-02 |
| cora   | CG11949_ESCL2_2011 | -3.520 | 8.79.E-55 | 1.98.E-50 | 38106 | A_09_P012506 | -0.914 | 2.60.E-03 | 3.80.E-02 |
| epo    | CG31243_ESCL1_6148 | -2.021 | 2.80.E-21 | 5.21.E-17 | 38544 | A_09_P041801 | -1.041 | 1.36.E-03 | 2.83.E-02 |
|        |                    |        |           |           | 5238  | A_09_P225995 | -0.873 | 3.07.E-03 | 4.08.E-02 |
| epo    | CG31243_ESCL2_1631 | -0.914 | 2.70.E-08 | 3.77.E-04 | 38544 | A_09_P041801 | -1.041 | 1.36.E-03 | 2.83.E-02 |
|        |                    |        |           |           | 5238  | A_09_P225995 | -0.873 | 3.07.E-03 | 4.08.E-02 |
| epo    | CG31243_ESCL3_2132 | -1.807 | 6.44.E-21 | 1.19.E-16 | 38544 | A_09_P041801 | -1.041 | 1.36.E-03 | 2.83.E-02 |
|        |                    |        |           |           | 5238  | A_09_P225995 | -0.873 | 3.07.E-03 | 4.08.E-02 |
| epo    | CG31243_ESCL4_896  | -3.694 | 1.44.E-45 | 3.20.E-41 | 38544 | A_09_P041801 | -1.041 | 1.36.E-03 | 2.83.E-02 |
|        |                    |        |           |           | 5238  | A_09_P225995 | -0.873 | 3.07.E-03 | 4.08.E-02 |
| cpx    | CG17299_ESCL3_4138 | -1.532 | 1.19.E-13 | 1.95.E-09 | 43734 | A_09_P064316 | -1.014 | 2.38.E-03 | 3.66.E-02 |
|        |                    |        |           |           | 12609 | A_09_P182675 | -0.920 | 3.80.E-03 | 4.48.E-02 |
|        |                    |        |           |           | 20944 | A_09_P193225 | -0.883 | 1.63.E-03 | 3.11.E-02 |
|        |                    |        |           |           | 36183 | A_09_P225125 | -0.709 | 4.62.E-03 | 4.97.E-02 |

|        |                     |        |           |           |       |              |        |           |           |
|--------|---------------------|--------|-----------|-----------|-------|--------------|--------|-----------|-----------|
| cpx    | CG32490_ESCL1_3485  | -1.820 | 8.09.E-08 | 1.11.E-03 | 43734 | A_09_P064316 | -1.014 | 2.38.E-03 | 3.66.E-02 |
|        |                     |        |           |           | 12609 | A_09_P182675 | -0.920 | 3.80.E-03 | 4.48.E-02 |
|        |                     |        |           |           | 20944 | A_09_P193225 | -0.883 | 1.63.E-03 | 3.11.E-02 |
|        |                     |        |           |           | 36183 | A_09_P225125 | -0.709 | 4.62.E-03 | 4.97.E-02 |
|        |                     |        |           |           | 37465 | A_09_P179220 | -1.168 | 1.08.E-03 | 2.52.E-02 |
| d      | CG10595_ESCL1_3978  | -3.986 | 3.01.E-43 | 6.65.E-39 | 21042 | A_09_P041896 | -1.029 | 1.34.E-03 | 2.82.E-02 |
|        |                     |        |           |           | 37465 | A_09_P179220 | -1.168 | 1.08.E-03 | 2.52.E-02 |
| d      | CG10595_ESCL2_3635  | -2.049 | 2.37.E-30 | 4.87.E-26 | 21042 | A_09_P041896 | -1.029 | 1.34.E-03 | 2.82.E-02 |
| dally  | CG4974_ESCL1_3365   | -4.362 | 1.28.E-34 | 2.72.E-30 | 18003 | A_09_P013216 | -1.469 | 1.24.E-03 | 2.70.E-02 |
| dally  | CG4974_ESCL2_1807   | -0.446 | 2.52.E-06 | 3.23.E-02 | 18003 | A_09_P013216 | -1.469 | 1.24.E-03 | 2.70.E-02 |
| Dap160 | CG1099_ESCL1_3841   | -0.568 | 8.02.E-14 | 1.31.E-09 | 10696 | A_09_P209195 | -0.977 | 4.08.E-03 | 4.66.E-02 |
| Dap160 | CG1099_ESCL2_3215   | -0.396 | 2.54.E-10 | 3.79.E-06 | 10696 | A_09_P209195 | -0.977 | 4.08.E-03 | 4.66.E-02 |
| dib    | CG12028_ESCL2_1379  | -2.463 | 3.18.E-32 | 6.65.E-28 | 2189  | A_09_P141385 | -0.897 | 2.27.E-03 | 3.60.E-02 |
| dnr1   | CG12489_ESCL1_3109  | -1.336 | 9.23.E-21 | 1.71.E-16 | 6521  | A_09_P026511 | -0.785 | 4.51.E-03 | 4.91.E-02 |
| dnr1   | CG12489_ESCL2_1716  | -0.527 | 2.01.E-06 | 2.59.E-02 | 6521  | A_09_P026511 | -0.785 | 4.51.E-03 | 4.91.E-02 |
| Dok    | CG2079_ESCL1_3335   | -1.836 | 1.17.E-35 | 2.51.E-31 | 837   | A_09_P189630 | -1.039 | 2.84.E-03 | 3.95.E-02 |
|        |                     |        |           |           | 17607 | A_09_P067886 | -0.868 | 2.45.E-03 | 3.69.E-02 |
| Dok    | CG2079_ESCL2_1711   | -0.641 | 8.25.E-09 | 1.18.E-04 | 837   | A_09_P189630 | -1.039 | 2.84.E-03 | 3.95.E-02 |
|        |                     |        |           |           | 17607 | A_09_P067886 | -0.868 | 2.45.E-03 | 3.69.E-02 |
| drl    | CG17348_ESCL1_3022  | -2.891 | 4.48.E-33 | 9.43.E-29 | 37836 | A_09_P030801 | -0.801 | 4.26.E-03 | 4.76.E-02 |
| drl    | CG17348_ESCL2_1758  | -2.289 | 1.94.E-36 | 4.16.E-32 | 37836 | A_09_P030801 | -0.801 | 4.26.E-03 | 4.76.E-02 |
| drl    | CG17348_ESCL3_2466  | -2.823 | 2.95.E-34 | 6.26.E-30 | 37836 | A_09_P030801 | -0.801 | 4.26.E-03 | 4.76.E-02 |
| drongo | CG3365_ESCL2_1745   | -0.720 | 7.33.E-17 | 1.28.E-12 | 6441  | A_09_P032206 | -0.780 | 4.45.E-03 | 4.88.E-02 |
| Dys    | CG31175_ESCL1_10382 | -1.169 | 3.05.E-19 | 5.53.E-15 | 7035  | A_09_P045866 | -1.956 | 1.81.E-04 | 1.14.E-02 |
|        |                     |        |           |           | 8007  | A_09_P091350 | -1.119 | 6.51.E-04 | 1.96.E-02 |
| Dys    | CG31175_ESCL2_9896  | -1.610 | 4.73.E-14 | 7.78.E-10 | 7035  | A_09_P045866 | -1.956 | 1.81.E-04 | 1.14.E-02 |
|        |                     |        |           |           | 8007  | A_09_P091350 | -1.119 | 6.51.E-04 | 1.96.E-02 |
| east   | CG4399_ESCL1_7292   | -0.964 | 2.43.E-23 | 4.64.E-19 | 36404 | A_09_P222800 | -0.823 | 4.17.E-03 | 4.71.E-02 |
| east   | CG4399_ESCL2_6813   | -0.937 | 6.22.E-27 | 1.24.E-22 | 36404 | A_09_P222800 | -0.823 | 4.17.E-03 | 4.71.E-02 |
| EcR    | CG1765_ESCL1_4635   | -3.231 | 2.69.E-36 | 5.78.E-32 | 699   | A_09_P206975 | -2.031 | 4.31.E-05 | 7.50.E-03 |
|        |                     |        |           |           | 6362  | A_09_P051976 | -1.700 | 3.28.E-04 | 1.45.E-02 |
|        |                     |        |           |           | 4982  | A_09_P042146 | -1.636 | 1.45.E-04 | 1.05.E-02 |
|        |                     |        |           |           | 2439  | A_09_P042146 | -1.579 | 1.79.E-04 | 1.14.E-02 |
|        |                     |        |           |           | 21290 | A_09_P050511 | -1.457 | 4.22.E-04 | 1.59.E-02 |
| EcR    | CG1765_ESCL2_2487   | -2.044 | 3.15.E-33 | 6.63.E-29 | 699   | A_09_P206975 | -2.031 | 4.31.E-05 | 7.50.E-03 |
|        |                     |        |           |           | 6362  | A_09_P051976 | -1.700 | 3.28.E-04 | 1.45.E-02 |
|        |                     |        |           |           | 4982  | A_09_P042146 | -1.636 | 1.45.E-04 | 1.05.E-02 |
|        |                     |        |           |           | 2439  | A_09_P042146 | -1.579 | 1.79.E-04 | 1.14.E-02 |
|        |                     |        |           |           | 21290 | A_09_P050511 | -1.457 | 4.22.E-04 | 1.59.E-02 |
| EcR    | CG1765_ESCL3_1802   | -4.066 | 2.12.E-40 | 4.63.E-36 | 699   | A_09_P206975 | -2.031 | 4.31.E-05 | 7.50.E-03 |
|        |                     |        |           |           | 6362  | A_09_P051976 | -1.700 | 3.28.E-04 | 1.45.E-02 |
|        |                     |        |           |           | 4982  | A_09_P042146 | -1.636 | 1.45.E-04 | 1.05.E-02 |
|        |                     |        |           |           | 2439  | A_09_P042146 | -1.579 | 1.79.E-04 | 1.14.E-02 |
|        |                     |        |           |           | 21290 | A_09_P050511 | -1.457 | 4.22.E-04 | 1.59.E-02 |
| EcR    | CG1765_ESCL4_3438   | -2.920 | 2.65.E-36 | 5.69.E-32 | 699   | A_09_P206975 | -2.031 | 4.31.E-05 | 7.50.E-03 |
|        |                     |        |           |           | 6362  | A_09_P051976 | -1.700 | 3.28.E-04 | 1.45.E-02 |
|        |                     |        |           |           | 4982  | A_09_P042146 | -1.636 | 1.45.E-04 | 1.05.E-02 |
|        |                     |        |           |           | 2439  | A_09_P042146 | -1.579 | 1.79.E-04 | 1.14.E-02 |
|        |                     |        |           |           | 21290 | A_09_P050511 | -1.457 | 4.22.E-04 | 1.59.E-02 |
| Eip75B | CG8127_ESCL1_4421   | -1.521 | 1.27.E-13 | 2.07.E-09 | 18320 | A_09_P049541 | -1.504 | 3.44.E-04 | 1.45.E-02 |
|        |                     |        |           |           | 18320 | A_09_P049541 | -1.504 | 3.44.E-04 | 1.45.E-02 |
| Eip75B | CG8127_ESCL3_4063   | -0.625 | 1.21.E-06 | 1.58.E-02 | 32472 | A_09_P090750 | -1.450 | 1.36.E-03 | 2.83.E-02 |
|        |                     |        |           |           | 43452 | A_09_P121080 | -1.027 | 1.18.E-03 | 2.65.E-02 |
| elav   | CG4262_ESCL1_2350   | -3.734 | 1.90.E-41 | 4.17.E-37 | 21436 | A_09_P042226 | -0.824 | 3.66.E-03 | 4.45.E-02 |
|        |                     |        |           |           | 34863 | A_09_P188635 | -0.740 | 3.55.E-03 | 4.36.E-02 |
| elav   | CG4262_ESCL2_1301   | -2.765 | 4.22.E-40 | 9.23.E-36 | 32472 | A_09_P090750 | -1.450 | 1.36.E-03 | 2.83.E-02 |
|        |                     |        |           |           | 43452 | A_09_P121080 | -1.027 | 1.18.E-03 | 2.65.E-02 |
| Eno    | CG17654_ESCL1_2078  | -0.876 | 6.95.E-14 | 1.14.E-09 | 38188 | A_09_P042251 | -0.929 | 1.32.E-03 | 2.79.E-02 |
|        |                     |        |           |           | 1214  | A_09_P042251 | -0.883 | 1.71.E-03 | 3.20.E-02 |
| Eno    | CG17654_ESCL2_1412  | -0.640 | 1.30.E-13 | 2.12.E-09 | 38188 | A_09_P042251 | -0.929 | 1.32.E-03 | 2.79.E-02 |
|        |                     |        |           |           | 1214  | A_09_P042251 | -0.883 | 1.71.E-03 | 3.20.E-02 |
| esn    | CG12833_ESCL1_4152  | -2.612 | 5.14.E-34 | 1.09.E-29 | 36969 | A_09_P134125 | -2.078 | 2.30.E-03 | 3.63.E-02 |
| Exn    | CG3799_ESCL1_3408   | -3.275 | 5.23.E-27 | 1.04.E-22 | 7685  | A_09_P065501 | -1.918 | 2.43.E-04 | 1.26.E-02 |
|        |                     |        |           |           | 24540 | A_09_P178980 | -1.047 | 2.33.E-03 | 3.64.E-02 |
| Exn    | CG3799_ESCL2_3035   | -1.926 | 6.53.E-32 | 1.36.E-27 | 13420 | A_09_P079726 | -0.901 | 1.91.E-03 | 3.34.E-02 |
|        |                     |        |           |           | 24540 | A_09_P178980 | -1.047 | 2.33.E-03 | 3.64.E-02 |
|        |                     |        |           |           | 13420 | A_09_P079726 | -0.901 | 1.91.E-03 | 3.34.E-02 |

|             |                    |        |           |           |       |              |        |           |           |
|-------------|--------------------|--------|-----------|-----------|-------|--------------|--------|-----------|-----------|
| fax         | CG4609_ESCL1_2930  | -3.604 | 1.42.E-52 | 3.19.E-48 | 37871 | A_09_P126520 | -1.708 | 9.12.E-04 | 2.33.E-02 |
|             |                    |        |           |           | 6109  | A_09_P030211 | -1.351 | 1.09.E-03 | 2.54.E-02 |
|             |                    |        |           |           | 23163 | A_09_P030211 | -1.244 | 1.07.E-03 | 2.52.E-02 |
|             |                    |        |           |           | 13780 | A_09_P147645 | -1.048 | 2.10.E-03 | 3.50.E-02 |
|             |                    |        |           |           | 43686 | A_09_P050171 | -0.983 | 1.78.E-03 | 3.21.E-02 |
| fax         | CG4609_ESCL2_998   | -3.320 | 1.49.E-54 | 3.35.E-50 | 37871 | A_09_P126520 | -1.708 | 9.12.E-04 | 2.33.E-02 |
|             |                    |        |           |           | 6109  | A_09_P030211 | -1.351 | 1.09.E-03 | 2.54.E-02 |
|             |                    |        |           |           | 23163 | A_09_P030211 | -1.244 | 1.07.E-03 | 2.52.E-02 |
|             |                    |        |           |           | 13780 | A_09_P147645 | -1.048 | 2.10.E-03 | 3.50.E-02 |
|             |                    |        |           |           | 43686 | A_09_P050171 | -0.983 | 1.78.E-03 | 3.21.E-02 |
| fax         | CG4609_ESCL3_1784  | -3.654 | 1.55.E-54 | 3.48.E-50 | 37871 | A_09_P126520 | -1.708 | 9.12.E-04 | 2.33.E-02 |
|             |                    |        |           |           | 6109  | A_09_P030211 | -1.351 | 1.09.E-03 | 2.54.E-02 |
|             |                    |        |           |           | 23163 | A_09_P030211 | -1.244 | 1.07.E-03 | 2.52.E-02 |
|             |                    |        |           |           | 13780 | A_09_P147645 | -1.048 | 2.10.E-03 | 3.50.E-02 |
|             |                    |        |           |           | 43686 | A_09_P050171 | -0.983 | 1.78.E-03 | 3.21.E-02 |
| Fhos        | CG32030_ESCL1_4939 | -2.022 | 5.95.E-18 | 1.06.E-13 | 13217 | A_09_P047936 | -1.871 | 9.71.E-05 | 9.21.E-03 |
| Fhos        | CG32030_ESCL2_3816 | -1.319 | 9.14.E-18 | 1.62.E-13 | 13217 | A_09_P047936 | -1.871 | 9.71.E-05 | 9.21.E-03 |
| Fhos        | CG32030_ESCL3_4113 | -1.675 | 4.85.E-31 | 1.00.E-26 | 13217 | A_09_P047936 | -1.871 | 9.71.E-05 | 9.21.E-03 |
| Fhos        | CG32030_ESCL4_4124 | -1.200 | 8.03.E-17 | 1.40.E-12 | 13217 | A_09_P047936 | -1.871 | 9.71.E-05 | 9.21.E-03 |
| fj          | CG10917_ESCL1_3449 | -4.453 | 4.04.E-27 | 8.04.E-23 | 27168 | A_09_P042371 | -3.617 | 2.87.E-04 | 1.35.E-02 |
|             |                    |        |           |           | 9710  | A_09_P042371 | -3.564 | 2.48.E-04 | 1.27.E-02 |
|             |                    |        |           |           | 20441 | A_09_P121565 | -3.130 | 2.59.E-04 | 1.29.E-02 |
| fj          | CG10917_ESCL2_1649 | -2.657 | 7.82.E-33 | 1.64.E-28 | 27168 | A_09_P042371 | -3.617 | 2.87.E-04 | 1.35.E-02 |
|             |                    |        |           |           | 9710  | A_09_P042371 | -3.564 | 2.48.E-04 | 1.27.E-02 |
|             |                    |        |           |           | 20441 | A_09_P121565 | -3.130 | 2.59.E-04 | 1.29.E-02 |
| fng         | CG10580_ESCL1_1802 | -1.513 | 2.52.E-20 | 4.64.E-16 | 5908  | A_09_P013246 | -2.826 | 9.97.E-05 | 9.34.E-03 |
|             |                    |        |           |           | 6182  | A_09_P013246 | -2.781 | 2.04.E-03 | 3.45.E-02 |
| fng         | CG10580_ESCL2_970  | -1.566 | 6.33.E-21 | 1.17.E-16 | 5908  | A_09_P013246 | -2.826 | 9.97.E-05 | 9.34.E-03 |
|             |                    |        |           |           | 6182  | A_09_P013246 | -2.781 | 2.04.E-03 | 3.45.E-02 |
| for         | CG10033_ESCL1_4464 | -1.281 | 2.75.E-28 | 5.55.E-24 | 4490  | A_09_P042411 | -0.993 | 1.53.E-03 | 3.00.E-02 |
|             |                    |        |           |           | 4302  | A_09_P042411 | -0.937 | 2.11.E-03 | 3.50.E-02 |
| for         | CG10033_ESCL2_3177 | -0.988 | 1.50.E-20 | 2.76.E-16 | 4490  | A_09_P042411 | -0.993 | 1.53.E-03 | 3.00.E-02 |
|             |                    |        |           |           | 4302  | A_09_P042411 | -0.937 | 2.11.E-03 | 3.50.E-02 |
| for         | CG10033_ESCL3_3984 | -1.198 | 7.98.E-25 | 1.55.E-20 | 4490  | A_09_P042411 | -0.993 | 1.53.E-03 | 3.00.E-02 |
|             |                    |        |           |           | 4302  | A_09_P042411 | -0.937 | 2.11.E-03 | 3.50.E-02 |
| fs(1)K10    | CG3218_ESCL1_2991  | -1.412 | 2.20.E-27 | 4.40.E-23 | 13816 | A_09_P042426 | -4.190 | 2.72.E-07 | 3.55.E-03 |
|             |                    |        |           |           | 27524 | A_09_P042426 | -4.089 | 2.87.E-07 | 3.55.E-03 |
| fs(1)K10    | CG3218_ESCL2_1320  | -1.738 | 2.73.E-18 | 4.87.E-14 | 13816 | A_09_P042426 | -4.190 | 2.72.E-07 | 3.55.E-03 |
|             |                    |        |           |           | 27524 | A_09_P042426 | -4.089 | 2.87.E-07 | 3.55.E-03 |
| fz3         | CG16785_ESCL2_1671 | -0.564 | 1.83.E-09 | 2.66.E-05 | 28100 | A_09_P079251 | -1.240 | 1.26.E-03 | 2.71.E-02 |
|             |                    |        |           |           | 32287 | A_09_P199375 | -0.947 | 1.12.E-03 | 2.56.E-02 |
| G-salphi60A | CG2835_ESCL3_907   | -1.474 | 4.19.E-30 | 8.60.E-26 | 44066 | A_09_P042581 | -1.068 | 3.61.E-03 | 4.40.E-02 |
|             |                    |        |           |           | 12451 | A_09_P042581 | -1.022 | 1.56.E-03 | 3.04.E-02 |
|             |                    |        |           |           | 8655  | A_09_P196460 | -0.788 | 4.66.E-03 | 4.99.E-02 |
| G-salphi60A | CG2835_ESCL4_907   | -1.381 | 1.38.E-26 | 2.73.E-22 | 44066 | A_09_P042581 | -1.068 | 3.61.E-03 | 4.40.E-02 |
|             |                    |        |           |           | 12451 | A_09_P042581 | -1.022 | 1.56.E-03 | 3.04.E-02 |
|             |                    |        |           |           | 8655  | A_09_P196460 | -0.788 | 4.66.E-03 | 4.99.E-02 |
| galectin    | CG11372_ESCL1_1449 | -0.815 | 1.36.E-14 | 2.26.E-10 | 16459 | A_09_P122725 | -1.641 | 8.82.E-05 | 8.90.E-03 |
|             |                    |        |           |           | 20671 | A_09_P017791 | -1.635 | 1.98.E-04 | 1.18.E-02 |
| Gasp        | CG10287_ESCL1_1206 | -1.130 | 8.16.E-17 | 1.42.E-12 | 15864 | A_09_P078086 | -1.023 | 8.96.E-04 | 2.30.E-02 |
| Gasp        | CG10287_ESCL2_691  | -2.201 | 1.81.E-23 | 3.47.E-19 | 15864 | A_09_P078086 | -1.023 | 8.96.E-04 | 2.30.E-02 |
| ghb         | CG5562_ESCL1_1277  | -2.272 | 2.13.E-39 | 4.64.E-35 | 44930 | A_09_P076726 | -0.876 | 1.79.E-03 | 3.22.E-02 |
|             |                    |        |           |           | 37890 | A_09_P076726 | -0.824 | 2.30.E-03 | 3.63.E-02 |
| Gli         | CG3903_ESCL1_3875  | -2.249 | 1.70.E-31 | 3.53.E-27 | 16331 | A_09_P043156 | -1.531 | 7.13.E-04 | 2.04.E-02 |
|             |                    |        |           |           | 6738  | A_09_P043156 | -1.510 | 1.45.E-03 | 2.92.E-02 |
|             |                    |        |           |           | 16041 | A_09_P144150 | -1.129 | 1.80.E-03 | 3.23.E-02 |
| gol         | CG2679_ESCL1_2485  | -0.884 | 1.06.E-12 | 1.69.E-08 | 25769 | A_09_P146635 | -1.331 | 3.33.E-03 | 4.24.E-02 |
|             |                    |        |           |           | 42537 | A_09_P011351 | -1.289 | 2.56.E-03 | 3.77.E-02 |
| gol         | CG2679_ESCL2_2309  | -1.925 | 7.67.E-21 | 1.42.E-16 | 25769 | A_09_P146635 | -1.331 | 3.33.E-03 | 4.24.E-02 |
|             |                    |        |           |           | 42537 | A_09_P011351 | -1.289 | 2.56.E-03 | 3.77.E-02 |
| Gp150       | CG5820_ESCL1_4112  | -2.963 | 1.49.E-49 | 3.33.E-45 | 33169 | A_09_P116275 | -0.764 | 4.66.E-03 | 4.99.E-02 |
|             |                    |        |           |           | 28300 | A_09_P029566 | -0.758 | 3.48.E-03 | 4.31.E-02 |
| Gp150       | CG5820_ESCL2_3039  | -1.813 | 4.43.E-30 | 9.09.E-26 | 33169 | A_09_P116275 | -0.764 | 4.66.E-03 | 4.99.E-02 |
|             |                    |        |           |           | 28300 | A_09_P029566 | -0.758 | 3.48.E-03 | 4.31.E-02 |
| GstD1       | CG10045_ESCL1_477  | -2.205 | 3.12.E-32 | 6.52.E-28 | 757   | A_09_P042646 | -3.246 | 9.49.E-06 | 5.81.E-03 |
|             |                    |        |           |           | 27083 | A_09_P042646 | -3.059 | 7.74.E-06 | 5.81.E-03 |
| GstD10      | CG18548_ESCL1_561  | -1.391 | 1.50.E-22 | 2.85.E-18 | 24830 | A_09_P064681 | -3.535 | 3.93.E-05 | 7.50.E-03 |
|             |                    |        |           |           | 10299 | A_09_P209530 | -3.513 | 1.12.E-04 | 9.54.E-03 |
| GstD2       | CG4181_ESCL1_575   | -1.015 | 3.45.E-07 | 4.61.E-03 | 35205 | A_09_P147905 | -1.801 | 1.28.E-04 | 1.01.E-02 |

|           |                     |        |           |           |       |              |        |           |           |
|-----------|---------------------|--------|-----------|-----------|-------|--------------|--------|-----------|-----------|
|           |                     |        |           |           | 17233 | A_09_P011881 | -1.615 | 2.55.E-04 | 1.29.E-02 |
|           |                     |        |           |           | 30486 | A_09_P011881 | -1.521 | 2.99.E-04 | 1.38.E-02 |
| GstD9     | CG10091_ESCL1_592   | -0.510 | 3.25.E-15 | 5.48.E-11 | 36371 | A_09_P074286 | -1.923 | 4.26.E-05 | 7.50.E-03 |
| GstE6     | CG17530_ESCL1_533   | -1.903 | 1.06.E-36 | 2.27.E-32 | 15967 | A_09_P001976 | -2.745 | 2.07.E-05 | 6.43.E-03 |
|           |                     |        |           |           | 1571  | A_09_P001976 | -2.552 | 5.40.E-05 | 7.82.E-03 |
| GstE7     | CG17531_ESCL1_606   | -1.806 | 9.41.E-44 | 2.08.E-39 | 6218  | A_09_P001971 | -1.937 | 3.41.E-05 | 7.50.E-03 |
|           |                     |        |           |           | 39291 | A_09_P001971 | -1.914 | 4.78.E-05 | 7.55.E-03 |
| GstE8     | CG17533_ESCL1_1098  | -0.718 | 7.55.E-07 | 9.93.E-03 | 24607 | A_09_P001966 | -0.884 | 3.11.E-03 | 4.10.E-02 |
| GstE8     | CG17533_ESCL2_541   | -2.328 | 3.76.E-24 | 7.26.E-20 | 24607 | A_09_P001966 | -0.884 | 3.11.E-03 | 4.10.E-02 |
| GstE9     | CG17533_ESCL3_1875  | -2.314 | 1.77.E-31 | 3.69.E-27 | 27135 | A_09_P001961 | -1.028 | 9.85.E-04 | 2.41.E-02 |
|           |                     |        |           |           | 15744 | A_09_P001961 | -0.920 | 1.27.E-03 | 2.72.E-02 |
| GstE9     | CG17534_ESCL1_565   | -1.421 | 5.64.E-24 | 1.09.E-19 | 27135 | A_09_P001961 | -1.028 | 9.85.E-04 | 2.41.E-02 |
|           |                     |        |           |           | 15744 | A_09_P001961 | -0.920 | 1.27.E-03 | 2.72.E-02 |
| H2.0      | CG11607_ESCL1_1595  | -3.264 | 3.73.E-16 | 6.41.E-12 | 28508 | A_09_P042671 | -1.004 | 2.34.E-03 | 3.64.E-02 |
| H2.0      | CG11607_ESCL2_1146  | -0.748 | 1.85.E-13 | 3.01.E-09 | 28508 | A_09_P042671 | -1.004 | 2.34.E-03 | 3.64.E-02 |
| hig       | CG2040_ESCL1_3831   | -0.997 | 4.29.E-09 | 6.17.E-05 | 40394 | A_09_P011971 | -2.042 | 2.54.E-03 | 3.77.E-02 |
|           |                     |        |           |           | 724   | A_09_P011971 | -1.878 | 1.37.E-03 | 2.83.E-02 |
| hipk      | CG17090_ESCL1_6210  | -0.991 | 1.04.E-16 | 1.80.E-12 | 34739 | A_09_P188060 | -0.989 | 2.92.E-03 | 4.00.E-02 |
|           |                     |        |           |           | 35996 | A_09_P028001 | -0.989 | 2.06.E-03 | 3.46.E-02 |
|           |                     |        |           |           | 19159 | A_09_P028001 | -0.705 | 4.71.E-03 | 5.00.E-02 |
| hipk      | CG17090_ESCL3_2769  | -1.042 | 6.22.E-19 | 1.12.E-14 | 34739 | A_09_P188060 | -0.989 | 2.92.E-03 | 4.00.E-02 |
|           |                     |        |           |           | 35996 | A_09_P028001 | -0.989 | 2.06.E-03 | 3.46.E-02 |
|           |                     |        |           |           | 19159 | A_09_P028001 | -0.705 | 4.71.E-03 | 5.00.E-02 |
| HLH4C     | CG3052_ESCL1_1240   | -0.807 | 3.55.E-07 | 4.75.E-03 | 35401 | A_09_P013011 | -0.797 | 3.02.E-03 | 4.05.E-02 |
| HLHm7     | CG8361_ESCL1_468    | -1.667 | 2.10.E-16 | 3.63.E-12 | 35451 | A_09_P180645 | -1.225 | 3.60.E-04 | 1.47.E-02 |
| Hsp22     | CG32041_ESCL4_255   | -2.579 | 1.80.E-28 | 3.64.E-24 | 40043 | A_09_P042786 | -0.801 | 2.42.E-03 | 3.69.E-02 |
|           |                     |        |           |           | 22406 | A_09_P042786 | -0.717 | 4.11.E-03 | 4.69.E-02 |
| Idgf4     | CG1780_ESCL1_1486   | -3.333 | 2.01.E-42 | 4.44.E-38 | 40411 | A_09_P078611 | -0.788 | 3.09.E-03 | 4.09.E-02 |
| Idgf4     | CG1780_ESCL2_1203   | -3.063 | 1.37.E-54 | 3.08.E-50 | 40411 | A_09_P078611 | -0.788 | 3.09.E-03 | 4.09.E-02 |
| inx2      | CG4590_ESCL1_2018   | -4.202 | 3.90.E-64 | 8.81.E-60 | 381   | A_09_P079136 | -0.807 | 2.55.E-03 | 3.77.E-02 |
|           |                     |        |           |           | 5075  | A_09_P079136 | -0.776 | 2.87.E-03 | 3.97.E-02 |
| inx2      | CG4590_ESCL2_1004   | -2.708 | 1.25.E-48 | 2.80.E-44 | 381   | A_09_P079136 | -0.807 | 2.55.E-03 | 3.77.E-02 |
|           |                     |        |           |           | 5075  | A_09_P079136 | -0.776 | 2.87.E-03 | 3.97.E-02 |
| inx3      | CG1448_ESCL1_1495   | -5.487 | 1.67.E-49 | 3.74.E-45 | 9408  | A_09_P064886 | -1.105 | 2.42.E-03 | 3.69.E-02 |
| inx3      | CG1448_ESCL2_767    | -2.636 | 4.84.E-37 | 1.04.E-32 | 9408  | A_09_P064886 | -1.105 | 2.42.E-03 | 3.69.E-02 |
| jar       | CG5695_ESCL1_4293   | -1.833 | 1.36.E-33 | 2.88.E-29 | 44306 | A_09_P012921 | -0.809 | 2.43.E-03 | 3.69.E-02 |
| jar       | CG5695_ESCL2_3690   | -1.555 | 8.61.E-38 | 1.87.E-33 | 44306 | A_09_P012921 | -0.809 | 2.43.E-03 | 3.69.E-02 |
| Jhl-26    | CG3767_ESCL1_1245   | -1.971 | 1.30.E-39 | 2.85.E-35 | 9433  | A_09_P065051 | -1.725 | 2.04.E-04 | 1.19.E-02 |
| kek5      | CG12199_ESCL1_4041  | -1.902 | 2.54.E-39 | 5.54.E-35 | 37568 | A_09_P040471 | -1.160 | 3.71.E-03 | 4.46.E-02 |
|           |                     |        |           |           | 11922 | A_09_P172690 | -0.943 | 3.88.E-03 | 4.54.E-02 |
| Kmn1      | CG1558_ESCL1_929    | -1.216 | 2.14.E-17 | 3.76.E-13 | 37594 | A_09_P079151 | -1.803 | 6.55.E-05 | 8.27.E-03 |
|           |                     |        |           |           | 12874 | A_09_P079151 | -1.764 | 3.99.E-05 | 7.50.E-03 |
| Kmn1      | CG1558_ESCL2_464    | -1.476 | 1.25.E-24 | 2.42.E-20 | 37594 | A_09_P079151 | -1.803 | 6.55.E-05 | 8.27.E-03 |
|           |                     |        |           |           | 12874 | A_09_P079151 | -1.764 | 3.99.E-05 | 7.50.E-03 |
| kni       | CG4717_ESCL1_1901   | -3.299 | 9.73.E-38 | 2.11.E-33 | 9631  | A_09_P042996 | -1.036 | 1.22.E-03 | 2.68.E-02 |
| kni       | CG4717_ESCL2_1218   | -1.617 | 4.88.E-29 | 9.92.E-25 | 9631  | A_09_P042996 | -1.036 | 1.22.E-03 | 2.68.E-02 |
| Kr        | CG3340_ESCL1_2165   | -4.242 | 2.68.E-52 | 6.01.E-48 | 32332 | A_09_P043016 | -1.151 | 4.17.E-03 | 4.71.E-02 |
| Kr        | CG3340_ESCL2_1446   | -1.594 | 5.76.E-28 | 1.16.E-23 | 32332 | A_09_P043016 | -1.151 | 4.17.E-03 | 4.71.E-02 |
| l(2)01810 | CG5304_ESCL1_2203   | -0.831 | 6.50.E-13 | 1.04.E-08 | 28619 | A_09_P012596 | -0.810 | 4.40.E-03 | 4.85.E-02 |
| l(3)neo38 | CG31364_ESCL1_631   | -2.223 | 1.76.E-25 | 3.45.E-21 | 13946 | A_09_P050936 | -0.980 | 1.08.E-03 | 2.53.E-02 |
|           |                     |        |           |           | 36780 | A_09_P116250 | -0.930 | 1.87.E-03 | 3.30.E-02 |
|           |                     |        |           |           | 22967 | A_09_P203805 | -0.845 | 3.19.E-03 | 4.15.E-02 |
|           |                     |        |           |           | 42411 | A_09_P126260 | -0.806 | 3.83.E-03 | 4.50.E-02 |
| l(3)neo38 | CG6930_ESCL1_1429   | -1.738 | 2.96.E-39 | 6.46.E-35 | 13946 | A_09_P050936 | -0.980 | 1.08.E-03 | 2.53.E-02 |
|           |                     |        |           |           | 36780 | A_09_P116250 | -0.930 | 1.87.E-03 | 3.30.E-02 |
|           |                     |        |           |           | 22967 | A_09_P203805 | -0.845 | 3.19.E-03 | 4.15.E-02 |
|           |                     |        |           |           | 42411 | A_09_P126260 | -0.806 | 3.83.E-03 | 4.50.E-02 |
| l(3)neo38 | CG6930_ESCL2_942    | -0.996 | 1.87.E-08 | 2.63.E-04 | 13946 | A_09_P050936 | -0.980 | 1.08.E-03 | 2.53.E-02 |
|           |                     |        |           |           | 36780 | A_09_P116250 | -0.930 | 1.87.E-03 | 3.30.E-02 |
|           |                     |        |           |           | 22967 | A_09_P203805 | -0.845 | 3.19.E-03 | 4.15.E-02 |
|           |                     |        |           |           | 42411 | A_09_P126260 | -0.806 | 3.83.E-03 | 4.50.E-02 |
| lama      | CG10645_ESCL1_3326  | -1.650 | 6.53.E-26 | 1.29.E-21 | 31816 | A_09_P031426 | -1.527 | 5.40.E-04 | 1.79.E-02 |
|           |                     |        |           |           | 37163 | A_09_P031426 | -1.491 | 1.00.E-03 | 2.43.E-02 |
| lama      | CG10645_ESCL2_1809  | -2.155 | 2.45.E-30 | 5.05.E-26 | 31816 | A_09_P031426 | -1.527 | 5.40.E-04 | 1.79.E-02 |
|           |                     |        |           |           | 37163 | A_09_P031426 | -1.491 | 1.00.E-03 | 2.43.E-02 |
| LanA      | CG10236_ESCL1_11482 | -4.374 | 1.36.E-58 | 3.08.E-54 | 17648 | A_09_P043306 | -1.674 | 6.63.E-05 | 8.27.E-03 |
| LanA      | CG10236_ESCL2_11025 | -3.569 | 3.26.E-55 | 7.33.E-51 | 17648 | A_09_P043306 | -1.674 | 6.63.E-05 | 8.27.E-03 |
| LanB1     | CG7123_ESCL1_6103   | -1.287 | 1.34.E-23 | 2.56.E-19 | 15218 | A_09_P043311 | -0.767 | 4.03.E-03 | 4.64.E-02 |
|           |                     |        |           |           | 40410 | A_09_P043311 | -0.753 | 3.33.E-03 | 4.24.E-02 |

|            |                     |        |           |           |       |              |        |           |           |
|------------|---------------------|--------|-----------|-----------|-------|--------------|--------|-----------|-----------|
| LanB1      | CG7123_ESCL2_5185   | -1.027 | 2.45.E-23 | 4.68.E-19 | 15218 | A_09_P043311 | -0.767 | 4.03.E-03 | 4.64.E-02 |
|            |                     |        |           |           | 40410 | A_09_P043311 | -0.753 | 3.33.E-03 | 4.24.E-02 |
| lbm        | CG2374_ESCL1_937    | -2.091 | 8.38.E-30 | 1.72.E-25 | 10847 | A_09_P031431 | -1.307 | 2.07.E-04 | 1.19.E-02 |
|            |                     |        |           |           | 28657 | A_09_P031431 | -1.220 | 5.81.E-04 | 1.85.E-02 |
| lbm        | CG2374_ESCL2_526    | -0.831 | 5.11.E-11 | 7.79.E-07 | 10847 | A_09_P031431 | -1.307 | 2.07.E-04 | 1.19.E-02 |
|            |                     |        |           |           | 28657 | A_09_P031431 | -1.220 | 5.81.E-04 | 1.85.E-02 |
| lea        | CG5481_ESCL1_1373   | -3.468 | 1.48.E-41 | 3.25.E-37 | 18419 | A_09_P043346 | -2.354 | 1.01.E-05 | 5.81.E-03 |
|            |                     |        |           |           | 25827 | A_09_P043346 | -2.171 | 2.51.E-05 | 6.83.E-03 |
| lea        | CG5481_ESCL2_3967   | -1.125 | 2.62.E-17 | 4.60.E-13 | 32337 | A_09_P133790 | -1.342 | 4.13.E-04 | 1.57.E-02 |
|            |                     |        |           |           | 18419 | A_09_P043346 | -2.354 | 1.01.E-05 | 5.81.E-03 |
|            |                     |        |           |           | 25827 | A_09_P043346 | -2.171 | 2.51.E-05 | 6.83.E-03 |
|            |                     |        |           |           | 32337 | A_09_P133790 | -1.342 | 4.13.E-04 | 1.57.E-02 |
| Lk6        | CG17342_ESCL1_4362  | -0.594 | 5.65.E-11 | 8.62.E-07 | 25726 | A_09_P117490 | -0.820 | 2.38.E-03 | 3.66.E-02 |
|            |                     |        |           |           | 32715 | A_09_P031896 | -0.717 | 4.70.E-03 | 5.00.E-02 |
| lmd        | CG4677_ESCL1_2938   | -2.857 | 1.69.E-42 | 3.72.E-38 | 19930 | A_09_P070481 | -1.077 | 2.62.E-03 | 3.81.E-02 |
| lmd        | CG4677_ESCL2_1573   | -1.732 | 1.32.E-23 | 2.53.E-19 | 19930 | A_09_P070481 | -1.077 | 2.62.E-03 | 3.81.E-02 |
| lmd        | CG4677_ESCL3_2528   | -2.481 | 5.02.E-37 | 1.08.E-32 | 19930 | A_09_P070481 | -1.077 | 2.62.E-03 | 3.81.E-02 |
| mb1        | CG33197_ESCL2_3679  | -0.809 | 4.23.E-12 | 6.65.E-08 | 23879 | A_09_P017096 | -1.131 | 2.38.E-03 | 3.66.E-02 |
| melt       | CG8624_ESCL1_2819   | -1.121 | 5.54.E-18 | 9.84.E-14 | 5535  | A_09_P045646 | -1.077 | 2.66.E-03 | 3.83.E-02 |
| Men        | CG10120_ESCL1_2861  | -1.752 | 6.09.E-27 | 1.21.E-22 | 5584  | A_09_P043541 | -2.284 | 8.37.E-06 | 5.81.E-03 |
|            |                     |        |           |           | 31172 | A_09_P091290 | -2.268 | 2.65.E-05 | 6.86.E-03 |
|            |                     |        |           |           | 15773 | A_09_P090755 | -1.215 | 4.45.E-04 | 1.63.E-02 |
| Men        | CG10120_ESCL2_2212  | -1.332 | 4.90.E-35 | 1.04.E-30 | 5584  | A_09_P043541 | -2.284 | 8.37.E-06 | 5.81.E-03 |
|            |                     |        |           |           | 31172 | A_09_P091290 | -2.268 | 2.65.E-05 | 6.86.E-03 |
|            |                     |        |           |           | 15773 | A_09_P090755 | -1.215 | 4.45.E-04 | 1.63.E-02 |
| miple2     | CG18321_ESCL1_778   | -3.306 | 6.64.E-46 | 1.48.E-41 | 10819 | A_09_P066351 | -1.760 | 6.51.E-05 | 8.27.E-03 |
|            |                     |        |           |           | 2898  | A_09_P066351 | -1.674 | 1.39.E-04 | 1.04.E-02 |
| mnd        | CG3297_ESCL1_1845   | -2.309 | 8.28.E-37 | 1.78.E-32 | 36460 | A_09_P154825 | -1.592 | 2.42.E-04 | 1.26.E-02 |
|            |                     |        |           |           | 1709  | A_09_P043611 | -1.535 | 3.14.E-04 | 1.42.E-02 |
| mnd        | CG3297_ESCL2_1423   | -1.401 | 3.39.E-27 | 6.74.E-23 | 26687 | A_09_P043611 | -1.514 | 3.41.E-04 | 1.45.E-02 |
|            |                     |        |           |           | 36460 | A_09_P154825 | -1.592 | 2.42.E-04 | 1.26.E-02 |
|            |                     |        |           |           | 1709  | A_09_P043611 | -1.535 | 3.14.E-04 | 1.42.E-02 |
|            |                     |        |           |           | 26687 | A_09_P043611 | -1.514 | 3.41.E-04 | 1.45.E-02 |
| modSP      | CG31217_ESCL1_2280  | -0.530 | 1.57.E-07 | 2.13.E-03 | 36166 | A_09_P059336 | -2.181 | 5.34.E-05 | 7.82.E-03 |
|            |                     |        |           |           | 27668 | A_09_P059336 | -1.856 | 1.02.E-04 | 9.38.E-03 |
|            |                     |        |           |           | 4568  | A_09_P198635 | -1.453 | 1.58.E-04 | 1.07.E-02 |
| modSP      | CG31217_ESCL2_1824  | -0.562 | 7.15.E-11 | 1.09.E-06 | 36166 | A_09_P059336 | -2.181 | 5.34.E-05 | 7.82.E-03 |
|            |                     |        |           |           | 27668 | A_09_P059336 | -1.856 | 1.02.E-04 | 9.38.E-03 |
|            |                     |        |           |           | 4568  | A_09_P198635 | -1.453 | 1.58.E-04 | 1.07.E-02 |
| Msp-300    | CG14035_ESCL1_753   | -1.071 | 1.09.E-10 | 1.64.E-06 | 4398  | A_09_P050461 | -2.343 | 1.39.E-04 | 1.04.E-02 |
|            |                     |        |           |           | 20893 | A_09_P050976 | -1.797 | 4.73.E-05 | 7.55.E-03 |
|            |                     |        |           |           | 38664 | A_09_P166080 | -1.282 | 4.36.E-03 | 4.82.E-02 |
|            |                     |        |           |           | 29967 | A_09_P046011 | -1.060 | 5.98.E-04 | 1.89.E-02 |
| Msp-300    | CG31649_ESCL1_11903 | -1.887 | 2.57.E-31 | 5.34.E-27 | 4398  | A_09_P050461 | -2.343 | 1.39.E-04 | 1.04.E-02 |
|            |                     |        |           |           | 20893 | A_09_P050976 | -1.797 | 4.73.E-05 | 7.55.E-03 |
|            |                     |        |           |           | 38664 | A_09_P166080 | -1.282 | 4.36.E-03 | 4.82.E-02 |
|            |                     |        |           |           | 29967 | A_09_P046011 | -1.060 | 5.98.E-04 | 1.89.E-02 |
| Msp-300    | CG31916_ESCL2_837   | -3.239 | 4.16.E-37 | 8.97.E-33 | 4398  | A_09_P050461 | -2.343 | 1.39.E-04 | 1.04.E-02 |
|            |                     |        |           |           | 20893 | A_09_P050976 | -1.797 | 4.73.E-05 | 7.55.E-03 |
|            |                     |        |           |           | 38664 | A_09_P166080 | -1.282 | 4.36.E-03 | 4.82.E-02 |
|            |                     |        |           |           | 29967 | A_09_P046011 | -1.060 | 5.98.E-04 | 1.89.E-02 |
| msta       | CG32800_ESCL1_1683  | -0.924 | 2.34.E-06 | 3.01.E-02 | 15352 | A_09_P000246 | -2.228 | 1.10.E-04 | 9.52.E-03 |
| msta       | CG32800_ESCL2_1310  | -0.340 | 2.46.E-09 | 3.57.E-05 | 15352 | A_09_P000246 | -2.228 | 1.10.E-04 | 9.52.E-03 |
| nth15      | CG6965_ESCL1_1257   | -1.154 | 3.40.E-20 | 6.24.E-16 | 39585 | A_09_P074051 | -1.285 | 2.08.E-04 | 1.19.E-02 |
|            |                     |        |           |           | 44144 | A_09_P074051 | -1.204 | 6.11.E-04 | 1.91.E-02 |
| Myo10A     | CG2174_ESCL1_8387   | -0.832 | 4.62.E-18 | 8.21.E-14 | 14782 | A_09_P037516 | -1.151 | 2.09.E-03 | 3.50.E-02 |
| Myo10A     | CG2174_ESCL2_7638   | -0.800 | 6.85.E-16 | 1.17.E-11 | 14782 | A_09_P037516 | -1.151 | 2.09.E-03 | 3.50.E-02 |
| myoglianin | CG1838_ESCL2_1725   | -1.239 | 8.01.E-25 | 1.56.E-20 | 9219  | A_09_P078306 | -1.024 | 1.64.E-03 | 3.11.E-02 |
|            |                     |        |           |           | 24237 | A_09_P078306 | -0.962 | 1.15.E-03 | 2.61.E-02 |
| myoglianin | CG1838_ESCL4_2703   | -1.065 | 1.61.E-07 | 2.18.E-03 | 9219  | A_09_P078306 | -1.024 | 1.64.E-03 | 3.11.E-02 |
|            |                     |        |           |           | 24237 | A_09_P078306 | -0.962 | 1.15.E-03 | 2.61.E-02 |
| mys        | CG1560_ESCL1_3705   | -0.524 | 1.08.E-07 | 1.48.E-03 | 43489 | A_09_P010991 | -0.954 | 2.02.E-03 | 3.43.E-02 |
|            |                     |        |           |           | 43249 | A_09_P010991 | -0.953 | 1.71.E-03 | 3.20.E-02 |
| N          | CG3936_ESCL1_9849   | -1.964 | 8.62.E-30 | 1.76.E-25 | 8672  | A_09_P010921 | -1.163 | 6.70.E-04 | 1.99.E-02 |
|            |                     |        |           |           | 11845 | A_09_P050251 | -0.908 | 1.93.E-03 | 3.36.E-02 |
| N          | CG3936_ESCL2_8049   | -1.830 | 6.43.E-35 | 1.37.E-30 | 8672  | A_09_P010921 | -1.163 | 6.70.E-04 | 1.99.E-02 |
|            |                     |        |           |           | 11845 | A_09_P050251 | -0.908 | 1.93.E-03 | 3.36.E-02 |
| Ndae1      | CG4675_ESCL1_3030   | -1.040 | 8.19.E-16 | 1.40.E-11 | 17784 | A_09_P020306 | -0.850 | 2.06.E-03 | 3.46.E-02 |
| nerfin-1   | CG13906_ESCL1_2930  | -4.586 | 8.62.E-29 | 1.75.E-24 | 38817 | A_09_P066346 | -1.001 | 3.55.E-03 | 4.36.E-02 |



|           |                    |        |           |           |                   |              |           |           |           |
|-----------|--------------------|--------|-----------|-----------|-------------------|--------------|-----------|-----------|-----------|
| net       | CG11450_ESCL1_2119 | -3.165 | 1.16.E-25 | 2.28.E-21 | 40137             | A_09_P043836 | -2.030    | 4.44.E-05 | 7.50.E-03 |
|           |                    |        |           |           | 22128             | A_09_P043836 | -1.643    | 5.56.E-05 | 7.90.E-03 |
| Nhe2      | CG9256_ESCL1_3725  | -0.563 | 7.02.E-10 | 1.04.E-05 | 33254             | A_09_P104200 | -1.272    | 4.18.E-04 | 1.58.E-02 |
|           |                    |        |           |           | 43639             | A_09_P189445 | -1.254    | 2.60.E-04 | 1.29.E-02 |
| noc       | CG4491_ESCL1_2721  | -3.286 | 1.90.E-32 | 3.98.E-28 | 43111             | A_09_P045726 | -1.243    | 2.78.E-04 | 1.34.E-02 |
|           |                    |        |           |           | 33758             | A_09_P011806 | -2.538    | 1.35.E-05 | 6.14.E-03 |
| noc       | CG4491_ESCL2_1551  | -4.259 | 1.38.E-52 | 3.10.E-48 | 22078             | A_09_P011806 | -2.519    | 1.14.E-05 | 5.91.E-03 |
|           |                    |        |           |           | 33758             | A_09_P011806 | -2.538    | 1.35.E-05 | 6.14.E-03 |
| noc       | CG4491_ESCL3_2334  | -4.097 | 4.00.E-50 | 8.96.E-46 | 22078             | A_09_P011806 | -2.519    | 1.14.E-05 | 5.91.E-03 |
|           |                    |        |           |           | 33758             | A_09_P011806 | -2.538    | 1.35.E-05 | 6.14.E-03 |
| Nplp2     | CG11051_ESCL1_369  | -4.531 | 1.84.E-53 | 4.14.E-49 | 26788             | A_09_P047146 | -1.032    | 2.22.E-03 | 3.59.E-02 |
|           |                    |        |           |           | CG11051_ESCL2_153 | -5.041       | 4.21.E-51 | 9.45.E-47 | 26788     |
| nullo     | CG14426_ESCL1_755  | -3.474 | 3.85.E-32 | 8.04.E-28 | 7651              | A_09_P010186 | -0.943    | 4.13.E-03 | 4.69.E-02 |
|           |                    |        |           |           | CG14426_ESCL2_550 | -2.223       | 1.55.E-29 | 3.17.E-25 | 7651      |
| Oatp30B   | CG3811_ESCL1_5300  | -2.650 | 5.28.E-44 | 1.17.E-39 | 38295             | A_09_P021126 | -1.223    | 1.33.E-03 | 2.80.E-02 |
|           |                    |        |           |           | 38992             | A_09_P021126 | -1.191    | 1.02.E-03 | 2.45.E-02 |
| Oatp30B   | CG3811_ESCL2_3508  | -1.438 | 2.11.E-19 | 3.84.E-15 | 38295             | A_09_P021126 | -1.223    | 1.33.E-03 | 2.80.E-02 |
|           |                    |        |           |           | 38992             | A_09_P021126 | -1.191    | 1.02.E-03 | 2.45.E-02 |
| odd       | CG3851_ESCL1_2226  | -3.192 | 8.62.E-41 | 1.89.E-36 | 22692             | A_09_P131435 | -1.666    | 1.42.E-04 | 1.04.E-02 |
|           |                    |        |           |           | CG3851_ESCL2_1110 | -2.404       | 1.20.E-34 | 2.55.E-30 | 22692     |
| ogre      | CG3039_ESCL1_2053  | -2.262 | 4.99.E-39 | 1.09.E-34 | 16526             | A_09_P143495 | -1.800    | 4.85.E-04 | 1.69.E-02 |
|           |                    |        |           |           | 36047             | A_09_P010916 | -1.641    | 1.42.E-04 | 1.04.E-02 |
| ogre      | CG3039_ESCL2_996   | -1.705 | 8.62.E-32 | 1.80.E-27 | 10474             | A_09_P010916 | -1.551    | 2.18.E-04 | 1.22.E-02 |
|           |                    |        |           |           | 33570             | A_09_P135225 | -1.319    | 3.07.E-04 | 1.40.E-02 |
| Orct2     | CG13610_ESCL1_2137 | -3.144 | 1.21.E-29 | 2.47.E-25 | 16526             | A_09_P143495 | -1.800    | 4.85.E-04 | 1.69.E-02 |
|           |                    |        |           |           | 36047             | A_09_P010916 | -1.641    | 1.42.E-04 | 1.04.E-02 |
| Orct2     | CG13610_ESCL2_1625 | -3.398 | 5.45.E-30 | 1.12.E-25 | 10474             | A_09_P010916 | -1.551    | 2.18.E-04 | 1.22.E-02 |
|           |                    |        |           |           | 33570             | A_09_P135225 | -1.319    | 3.07.E-04 | 1.40.E-02 |
| pb        | CG31481_ESCL2_3489 | -0.774 | 7.28.E-07 | 9.58.E-03 | 35907             | A_09_P048681 | -1.445    | 1.22.E-04 | 9.96.E-03 |
|           |                    |        |           |           | CG6117_ESCL1_2077 | -1.789       | 1.78.E-22 | 3.37.E-18 | 18219     |
| Pka-C3    | CG6117_ESCL3_1855  | -2.019 | 1.23.E-24 | 2.39.E-20 | 18219             | A_09_P048681 | -1.351    | 4.11.E-04 | 1.57.E-02 |
|           |                    |        |           |           | 29130             | A_09_P151010 | -1.581    | 8.84.E-04 | 2.28.E-02 |
| pnt       | CG17077_ESCL1_3048 | -0.811 | 1.56.E-15 | 2.64.E-11 | 42040             | A_09_P042051 | -2.445    | 3.68.E-04 | 1.48.E-02 |
|           |                    |        |           |           | 12679             | A_09_P042051 | -2.369    | 1.07.E-04 | 9.43.E-03 |
| pnt       | CG17077_ESCL2_2095 | -0.576 | 1.02.E-10 | 1.54.E-06 | 42040             | A_09_P042051 | -2.445    | 3.68.E-04 | 1.48.E-02 |
|           |                    |        |           |           | 12679             | A_09_P042051 | -2.369    | 1.07.E-04 | 9.43.E-03 |
| pot       | CG2467_ESCL1_3679  | -2.426 | 1.88.E-27 | 3.76.E-23 | 24625             | A_09_P135145 | -1.046    | 1.73.E-03 | 3.20.E-02 |
|           |                    |        |           |           | 62                | A_09_P044171 | -1.039    | 2.45.E-03 | 3.69.E-02 |
| Prx2540-2 | CG11765_ESCL1_601  | -2.723 | 1.32.E-50 | 2.96.E-46 | 31865             | A_09_P142265 | -1.028    | 2.45.E-03 | 3.69.E-02 |
|           |                    |        |           |           | 42973             | A_09_P044171 | -0.938    | 3.73.E-03 | 4.46.E-02 |
| ps        | CG16765_ESCL1_706  | -2.257 | 1.77.E-48 | 3.97.E-44 | 42973             | A_09_P044171 | -0.938    | 3.73.E-03 | 4.46.E-02 |
|           |                    |        |           |           | 31510             | A_09_P044171 | -0.918    | 4.13.E-03 | 4.69.E-02 |
| ps        | CG16777_ESCL1_491  | -1.328 | 6.47.E-23 | 1.23.E-18 | 4671              | A_09_P044171 | -0.901    | 4.42.E-03 | 4.86.E-02 |
|           |                    |        |           |           | 42528             | A_09_P044171 | -0.874    | 3.67.E-03 | 4.45.E-02 |
| ps        | CG8144_ESCL1_1656  | -2.819 | 1.08.E-32 | 2.26.E-28 | 24625             | A_09_P135145 | -1.046    | 1.73.E-03 | 3.20.E-02 |
|           |                    |        |           |           | 62                | A_09_P044171 | -1.039    | 2.45.E-03 | 3.69.E-02 |
| ps        | CG16777_ESCL1_491  | -1.328 | 6.47.E-23 | 1.23.E-18 | 31865             | A_09_P142265 | -1.028    | 2.45.E-03 | 3.69.E-02 |
|           |                    |        |           |           | 42973             | A_09_P044171 | -0.938    | 3.73.E-03 | 4.46.E-02 |
| ps        | CG16777_ESCL1_491  | -1.328 | 6.47.E-23 | 1.23.E-18 | 31510             | A_09_P044171 | -0.918    | 4.13.E-03 | 4.69.E-02 |
|           |                    |        |           |           | 4671              | A_09_P044171 | -0.901    | 4.42.E-03 | 4.86.E-02 |
| ps        | CG16777_ESCL1_491  | -1.328 | 6.47.E-23 | 1.23.E-18 | 42528             | A_09_P044171 | -0.874    | 3.67.E-03 | 4.45.E-02 |
|           |                    |        |           |           | 27576             | A_09_P128510 | -1.981    | 4.32.E-04 | 1.61.E-02 |
| ps        | CG16777_ESCL1_491  | -1.328 | 6.47.E-23 | 1.23.E-18 | 3483              | A_09_P006101 | -1.169    | 4.91.E-04 | 1.70.E-02 |
|           |                    |        |           |           | 40458             | A_09_P193630 | -1.299    | 6.95.E-04 | 2.02.E-02 |
| ps        | CG16777_ESCL1_491  | -1.328 | 6.47.E-23 | 1.23.E-18 | 20817             | A_09_P078251 | -1.083    | 1.42.E-03 | 2.88.E-02 |
|           |                    |        |           |           | 7683              | A_09_P078251 | -1.031    | 1.25.E-03 | 2.71.E-02 |
| ps        | CG16777_ESCL1_491  | -1.328 | 6.47.E-23 | 1.23.E-18 | 38290             | A_09_P078256 | -0.956    | 3.73.E-03 | 4.46.E-02 |
|           |                    |        |           |           | 33554             | A_09_P179165 | -0.943    | 3.24.E-03 | 4.18.E-02 |
| ps        | CG16777_ESCL1_491  | -1.328 | 6.47.E-23 | 1.23.E-18 | 8422              | A_09_P136435 | -0.817    | 4.25.E-03 | 4.75.E-02 |
|           |                    |        |           |           | 40458             | A_09_P193630 | -1.299    | 6.95.E-04 | 2.02.E-02 |
| ps        | CG16777_ESCL1_491  | -1.328 | 6.47.E-23 | 1.23.E-18 | 20817             | A_09_P078251 | -1.083    | 1.42.E-03 | 2.88.E-02 |
|           |                    |        |           |           | 7683              | A_09_P078251 | -1.031    | 1.25.E-03 | 2.71.E-02 |
| ps        | CG16777_ESCL1_491  | -1.328 | 6.47.E-23 | 1.23.E-18 | 38290             | A_09_P078256 | -0.956    | 3.73.E-03 | 4.46.E-02 |
|           |                    |        |           |           | 33554             | A_09_P179165 | -0.943    | 3.24.E-03 | 4.18.E-02 |
| ps        | CG16777_ESCL1_491  | -1.328 | 6.47.E-23 | 1.23.E-18 | 8422              | A_09_P136435 | -0.817    | 4.25.E-03 | 4.75.E-02 |
|           |                    |        |           |           | 40458             | A_09_P193630 | -1.299    | 6.95.E-04 | 2.02.E-02 |
| ps        | CG16777_ESCL1_491  | -1.328 | 6.47.E-23 | 1.23.E-18 | 20817             | A_09_P078251 | -1.083    | 1.42.E-03 | 2.88.E-02 |
|           |                    |        |           |           | 7683              | A_09_P078251 | -1.031    | 1.25.E-03 | 2.71.E-02 |

|          |                     |        |           |           |       |              |        |           |           |
|----------|---------------------|--------|-----------|-----------|-------|--------------|--------|-----------|-----------|
|          |                     |        |           |           | 38290 | A_09_P078256 | -0.956 | 3.73.E-03 | 4.46.E-02 |
|          |                     |        |           |           | 33554 | A_09_P179165 | -0.943 | 3.24.E-03 | 4.18.E-02 |
|          |                     |        |           |           | 8422  | A_09_P136435 | -0.817 | 4.25.E-03 | 4.75.E-02 |
| ps       | CG8144_ESCL3_1348   | -2.082 | 2.37.E-18 | 4.23.E-14 | 40458 | A_09_P193630 | -1.299 | 6.95.E-04 | 2.02.E-02 |
|          |                     |        |           |           | 20817 | A_09_P078251 | -1.083 | 1.42.E-03 | 2.88.E-02 |
|          |                     |        |           |           | 7683  | A_09_P078251 | -1.031 | 1.25.E-03 | 2.71.E-02 |
|          |                     |        |           |           | 38290 | A_09_P078256 | -0.956 | 3.73.E-03 | 4.46.E-02 |
|          |                     |        |           |           | 33554 | A_09_P179165 | -0.943 | 3.24.E-03 | 4.18.E-02 |
|          |                     |        |           |           | 8422  | A_09_P136435 | -0.817 | 4.25.E-03 | 4.75.E-02 |
| puc      | CG7850_ESCL1_2836   | -0.534 | 1.59.E-09 | 2.31.E-05 | 39500 | A_09_P010281 | -0.908 | 2.88.E-03 | 3.97.E-02 |
| pum      | CG9755_ESCL1_6549   | -2.222 | 8.54.E-33 | 1.79.E-28 | 32261 | A_09_P181770 | -1.434 | 6.80.E-04 | 2.00.E-02 |
|          |                     |        |           |           | 32660 | A_09_P044261 | -0.822 | 2.92.E-03 | 4.00.E-02 |
| pum      | CG9755_ESCL2_4254   | -0.872 | 3.01.E-12 | 4.75.E-08 | 32261 | A_09_P181770 | -1.434 | 6.80.E-04 | 2.00.E-02 |
|          |                     |        |           |           | 32660 | A_09_P044261 | -0.822 | 2.92.E-03 | 4.00.E-02 |
| Pvf2     | CG13780_ESCL1_1973  | -0.507 | 2.13.E-06 | 2.74.E-02 | 31772 | A_09_P020266 | -2.376 | 1.81.E-05 | 6.20.E-03 |
|          |                     |        |           |           | 34312 | A_09_P020266 | -2.329 | 1.38.E-05 | 6.14.E-03 |
|          |                     |        |           |           | 24728 | A_09_P121465 | -2.103 | 3.62.E-05 | 7.50.E-03 |
| Pvf2     | CG13780_ESCL2_1152  | -0.534 | 2.08.E-06 | 2.68.E-02 | 31772 | A_09_P020266 | -2.376 | 1.81.E-05 | 6.20.E-03 |
|          |                     |        |           |           | 34312 | A_09_P020266 | -2.329 | 1.38.E-05 | 6.14.E-03 |
|          |                     |        |           |           | 24728 | A_09_P121465 | -2.103 | 3.62.E-05 | 7.50.E-03 |
| Pvf3     | CG31629_ESCL2_1361  | -1.292 | 4.37.E-13 | 7.05.E-09 | 21703 | A_09_P121460 | -2.466 | 1.93.E-04 | 1.17.E-02 |
|          |                     |        |           |           | 671   | A_09_P164230 | -1.395 | 1.96.E-04 | 1.17.E-02 |
| pyd3     | CG3027_ESCL1_1094   | -2.865 | 5.53.E-47 | 1.23.E-42 | 23787 | A_09_P037061 | -1.093 | 6.08.E-04 | 1.91.E-02 |
|          |                     |        |           |           | 6658  | A_09_P037061 | -0.977 | 1.23.E-03 | 2.70.E-02 |
| qtc      | CG14039_ESCL1_2260  | -0.960 | 1.93.E-10 | 2.91.E-06 | 27132 | A_09_P065466 | -1.028 | 1.08.E-03 | 2.53.E-02 |
|          |                     |        |           |           | 9278  | A_09_P065466 | -1.011 | 2.51.E-03 | 3.75.E-02 |
|          |                     |        |           |           | 19137 | A_09_P153140 | -0.945 | 1.12.E-03 | 2.56.E-02 |
| Rab8     | CG8287_ESCL1_2081   | -2.751 | 2.71.E-30 | 5.57.E-26 | 3580  | A_09_P134980 | -0.770 | 3.57.E-03 | 4.37.E-02 |
| Rab8     | CG8287_ESCL2_465    | -2.259 | 3.59.E-34 | 7.60.E-30 | 3580  | A_09_P134980 | -0.770 | 3.57.E-03 | 4.37.E-02 |
| Rab8     | CG8287_ESCL3_1941   | -0.902 | 6.34.E-16 | 1.09.E-11 | 3580  | A_09_P134980 | -0.770 | 3.57.E-03 | 4.37.E-02 |
| ref(2)P  | CG10360_ESCL1_3533  | -0.756 | 4.90.E-21 | 9.10.E-17 | 12557 | A_09_P044376 | -0.931 | 2.36.E-03 | 3.64.E-02 |
|          |                     |        |           |           | 22119 | A_09_P044376 | -0.857 | 2.44.E-03 | 3.69.E-02 |
|          |                     |        |           |           | 8035  | A_09_P198585 | -0.755 | 3.73.E-03 | 4.46.E-02 |
| ref(2)P  | CG10360_ESCL2_1641  | -0.597 | 3.64.E-12 | 5.73.E-08 | 12557 | A_09_P044376 | -0.931 | 2.36.E-03 | 3.64.E-02 |
|          |                     |        |           |           | 22119 | A_09_P044376 | -0.857 | 2.44.E-03 | 3.69.E-02 |
|          |                     |        |           |           | 8035  | A_09_P198585 | -0.755 | 3.73.E-03 | 4.46.E-02 |
| rpr      | CG4319_ESCL1_493    | -0.689 | 4.74.E-09 | 6.80.E-05 | 44758 | A_09_P013426 | -2.127 | 2.60.E-04 | 1.29.E-02 |
| Rtn11    | CG33113_ESCL1_2617  | -2.658 | 1.16.E-24 | 2.25.E-20 | 26584 | A_09_P016851 | -0.878 | 2.99.E-03 | 4.02.E-02 |
|          |                     |        |           |           | 6145  | A_09_P136610 | -0.792 | 3.39.E-03 | 4.26.E-02 |
| Rtn11    | CG33113_ESCL2_1689  | -2.546 | 3.29.E-32 | 6.88.E-28 | 26584 | A_09_P016851 | -0.878 | 2.99.E-03 | 4.02.E-02 |
|          |                     |        |           |           | 6145  | A_09_P136610 | -0.792 | 3.39.E-03 | 4.26.E-02 |
| Rya-r44F | CG10844_ESCL1_15708 | -3.228 | 6.50.E-36 | 1.39.E-31 | 13843 | A_09_P102745 | -1.671 | 2.97.E-04 | 1.37.E-02 |
| Rya-r44F | CG10844_ESCL2_15181 | -1.848 | 1.55.E-31 | 3.22.E-27 | 13843 | A_09_P102745 | -1.671 | 2.97.E-04 | 1.37.E-02 |
| scb      | CG8095_ESCL1_4260   | -2.643 | 1.86.E-36 | 4.00.E-32 | 29576 | A_09_P044561 | -1.539 | 1.56.E-04 | 1.07.E-02 |
|          |                     |        |           |           | 4119  | A_09_P187265 | -1.526 | 2.84.E-04 | 1.34.E-02 |
|          |                     |        |           |           | 7101  | A_09_P044561 | -1.501 | 3.98.E-04 | 1.55.E-02 |
| scyl     | CG7590_ESCL1_2249   | -3.209 | 1.29.E-50 | 2.89.E-46 | 19463 | A_09_P224725 | -1.037 | 1.11.E-03 | 2.56.E-02 |
|          |                     |        |           |           | 34761 | A_09_P063976 | -0.961 | 1.79.E-03 | 3.22.E-02 |
| scyl     | CG7590_ESCL2_41     | -1.679 | 2.16.E-28 | 4.35.E-24 | 19463 | A_09_P224725 | -1.037 | 1.11.E-03 | 2.56.E-02 |
|          |                     |        |           |           | 34761 | A_09_P063976 | -0.961 | 1.79.E-03 | 3.22.E-02 |
| scyl     | CG7590_ESCL3_2510   | -2.719 | 4.76.E-32 | 9.93.E-28 | 19463 | A_09_P224725 | -1.037 | 1.11.E-03 | 2.56.E-02 |
|          |                     |        |           |           | 34761 | A_09_P063976 | -0.961 | 1.79.E-03 | 3.22.E-02 |
| sda      | CG5518_ESCL1_4707   | -1.320 | 4.61.E-18 | 8.20.E-14 | 19914 | A_09_P030891 | -2.702 | 7.56.E-06 | 5.81.E-03 |
|          |                     |        |           |           | 22081 | A_09_P030891 | -2.612 | 5.57.E-06 | 5.81.E-03 |
| Sema-5c  | CG5661_ESCL2_3189   | -2.750 | 8.15.E-35 | 1.73.E-30 | 24018 | A_09_P065586 | -1.412 | 3.90.E-04 | 1.53.E-02 |
|          |                     |        |           |           | 42804 | A_09_P065586 | -1.323 | 2.82.E-04 | 1.34.E-02 |
| sif      | CG5406_ESCL1_7798   | -0.577 | 5.33.E-08 | 7.37.E-04 | 33444 | A_09_P134315 | -1.413 | 8.85.E-04 | 2.28.E-02 |
|          |                     |        |           |           | 28896 | A_09_P004331 | -1.390 | 3.09.E-03 | 4.09.E-02 |
|          |                     |        |           |           | 14467 | A_09_P004336 | -0.932 | 2.41.E-03 | 3.69.E-02 |
| skl      | CG13701_ESCL1_1187  | -2.698 | 1.50.E-30 | 3.10.E-26 | 28876 | A_09_P034256 | -1.733 | 1.31.E-04 | 1.01.E-02 |
|          |                     |        |           |           | 18047 | A_09_P034256 | -1.618 | 1.01.E-04 | 9.35.E-03 |
| skl      | CG13701_ESCL2_239   | -0.695 | 4.18.E-09 | 6.01.E-05 | 28876 | A_09_P034256 | -1.733 | 1.31.E-04 | 1.01.E-02 |
|          |                     |        |           |           | 18047 | A_09_P034256 | -1.618 | 1.01.E-04 | 9.35.E-03 |
| slo      | CG6534_ESCL1_2681   | -3.545 | 4.70.E-30 | 9.64.E-26 | 37586 | A_09_P043881 | -0.924 | 3.14.E-03 | 4.11.E-02 |
| slo      | CG6534_ESCL2_1713   | -0.652 | 3.16.E-09 | 4.56.E-05 | 37586 | A_09_P043881 | -0.924 | 3.14.E-03 | 4.11.E-02 |
| sls      | CG1915_ESCL1_15059  | -3.418 | 1.75.E-32 | 3.67.E-28 | 38881 | A_09_P045221 | -1.201 | 4.37.E-03 | 4.82.E-02 |
| sls      | CG1915_ESCL3_14279  | -1.352 | 1.31.E-19 | 2.38.E-15 | 38881 | A_09_P045221 | -1.201 | 4.37.E-03 | 4.82.E-02 |
| sls      | CG1915_ESCL4_1524   | -1.648 | 4.83.E-13 | 7.77.E-09 | 38881 | A_09_P045221 | -1.201 | 4.37.E-03 | 4.82.E-02 |
| sls      | CG1915_ESCL5_2497   | -1.081 | 1.52.E-11 | 2.35.E-07 | 38881 | A_09_P045221 | -1.201 | 4.37.E-03 | 4.82.E-02 |

|         |                    |        |           |           |       |              |        |           |           |
|---------|--------------------|--------|-----------|-----------|-------|--------------|--------|-----------|-----------|
| sm      | CG9218_ESCL1_2769  | -1.043 | 1.44.E-18 | 2.58.E-14 | 21501 | A_09_P192270 | -1.924 | 4.12.E-03 | 4.69.E-02 |
|         |                    |        |           |           | 573   | A_09_P187005 | -1.567 | 3.48.E-03 | 4.31.E-02 |
|         |                    |        |           |           | 17355 | A_09_P209295 | -1.554 | 2.31.E-03 | 3.64.E-02 |
|         |                    |        |           |           | 41100 | A_09_P049316 | -1.271 | 5.54.E-04 | 1.82.E-02 |
|         |                    |        |           |           | 33261 | A_09_P044786 | -1.210 | 1.80.E-03 | 3.23.E-02 |
|         |                    |        |           |           | 18118 | A_09_P044786 | -1.153 | 1.99.E-03 | 3.40.E-02 |
| sm      | CG9218_ESCL2_1294  | -0.502 | 1.35.E-07 | 1.84.E-03 | 21501 | A_09_P192270 | -1.924 | 4.12.E-03 | 4.69.E-02 |
|         |                    |        |           |           | 573   | A_09_P187005 | -1.567 | 3.48.E-03 | 4.31.E-02 |
|         |                    |        |           |           | 17355 | A_09_P209295 | -1.554 | 2.31.E-03 | 3.64.E-02 |
|         |                    |        |           |           | 41100 | A_09_P049316 | -1.271 | 5.54.E-04 | 1.82.E-02 |
|         |                    |        |           |           | 33261 | A_09_P044786 | -1.210 | 1.80.E-03 | 3.23.E-02 |
|         |                    |        |           |           | 18118 | A_09_P044786 | -1.153 | 1.99.E-03 | 3.40.E-02 |
| sns     | CG33141_ESCL1_7919 | -1.259 | 1.41.E-20 | 2.61.E-16 | 15344 | A_09_P076681 | -0.941 | 1.75.E-03 | 3.20.E-02 |
|         |                    |        |           |           | 19232 | A_09_P171072 | -0.917 | 1.85.E-03 | 3.29.E-02 |
|         |                    |        |           |           | 42018 | A_09_P076681 | -0.890 | 3.28.E-03 | 4.20.E-02 |
| Soes36E | CG15154_ESCL1_3320 | -2.380 | 2.92.E-26 | 5.77.E-22 | 36849 | A_09_P045976 | -2.609 | 4.83.E-05 | 7.55.E-03 |
| Soes36E | CG15154_ESCL2_1816 | -0.928 | 4.20.E-12 | 6.60.E-08 | 36849 | A_09_P045976 | -2.609 | 4.83.E-05 | 7.55.E-03 |
| Soes36E | CG15154_ESCL3_2088 | -1.193 | 7.27.E-21 | 1.35.E-16 | 36849 | A_09_P045976 | -2.609 | 4.83.E-05 | 7.55.E-03 |
| Sox14   | CG3090_ESCL1_3088  | -2.288 | 8.41.E-19 | 1.51.E-14 | 5155  | A_09_P148280 | -1.173 | 2.92.E-03 | 4.00.E-02 |
| Sox14   | CG3090_ESCL2_1937  | -2.409 | 4.93.E-36 | 1.06.E-31 | 5155  | A_09_P148280 | -1.173 | 2.92.E-03 | 4.00.E-02 |
| Sox15   | CG8404_ESCL2_2291  | -0.595 | 1.25.E-06 | 1.63.E-02 | 28541 | A_09_P011551 | -1.309 | 1.87.E-03 | 3.30.E-02 |
| Spn100A | CG1342_ESCL1_1886  | -3.335 | 1.73.E-42 | 3.82.E-38 | 57    | A_09_P061456 | -0.855 | 2.18.E-03 | 3.56.E-02 |
| step    | CG11628_ESCL1_1674 | -0.957 | 1.71.E-29 | 3.50.E-25 | 585   | A_09_P202550 | -0.937 | 2.45.E-03 | 3.69.E-02 |
| step    | CG11628_ESCL2_1169 | -0.726 | 1.24.E-12 | 1.98.E-08 | 585   | A_09_P202550 | -0.937 | 2.45.E-03 | 3.69.E-02 |
| stv     | CG32130_ESCL1_3133 | -1.336 | 2.80.E-11 | 4.31.E-07 | 3913  | A_09_P014671 | -0.769 | 4.42.E-03 | 4.86.E-02 |
| sty     | CG1921_ESCL1_4183  | -2.759 | 2.43.E-40 | 5.31.E-36 | 20530 | A_09_P196120 | -0.751 | 3.73.E-03 | 4.46.E-02 |
| sty     | CG1921_ESCL2_3138  | -4.076 | 3.33.E-43 | 7.35.E-39 | 20530 | A_09_P196120 | -0.751 | 3.73.E-03 | 4.46.E-02 |
| sty     | CG1921_ESCL3_1673  | -3.333 | 6.92.E-42 | 1.52.E-37 | 20530 | A_09_P196120 | -0.751 | 3.73.E-03 | 4.46.E-02 |
| su(r)   | CG2194_ESCL1_3025  | -2.686 | 2.35.E-39 | 5.12.E-35 | 7675  | A_09_P150565 | -1.401 | 8.64.E-04 | 2.26.E-02 |
| Sxl     | CG33070_ESCL1_1763 | -1.694 | 3.86.E-34 | 8.17.E-30 | 12810 | A_09_P143460 | -1.148 | 4.71.E-03 | 5.00.E-02 |
| Sxl     | CG33070_ESCL2_3064 | -2.409 | 8.43.E-37 | 1.81.E-32 | 12810 | A_09_P143460 | -1.148 | 4.71.E-03 | 5.00.E-02 |
| Sxl     | CG33070_ESCL3_4822 | -1.480 | 1.21.E-12 | 1.93.E-08 | 12810 | A_09_P143460 | -1.148 | 4.71.E-03 | 5.00.E-02 |
| Sxl     | CG33070_ESCL5_104  | -0.436 | 1.01.E-10 | 1.53.E-06 | 12810 | A_09_P143460 | -1.148 | 4.71.E-03 | 5.00.E-02 |
| Syt1    | CG3139_ESCL1_3739  | -0.850 | 5.46.E-07 | 7.24.E-03 | 26229 | A_09_P049161 | -1.365 | 1.73.E-04 | 1.13.E-02 |
| tai     | CG13109_ESCL1_7447 | -0.671 | 6.47.E-08 | 8.92.E-04 | 12133 | A_09_P063971 | -1.132 | 1.65.E-03 | 3.11.E-02 |
|         |                    |        |           |           | 7514  | A_09_P174985 | -0.998 | 2.61.E-03 | 3.80.E-02 |
| TepII   | CG7052_ESCL1_4140  | -1.856 | 1.16.E-34 | 2.47.E-30 | 5399  | A_09_P213450 | -2.198 | 3.48.E-04 | 1.46.E-02 |
|         |                    |        |           |           | 3608  | A_09_P064071 | -1.893 | 1.82.E-04 | 1.14.E-02 |
|         |                    |        |           |           | 6660  | A_09_P064071 | -1.815 | 2.74.E-04 | 1.33.E-02 |
| Thor    | CG8846_ESCL1_638   | -0.710 | 3.07.E-12 | 4.85.E-08 | 14242 | A_09_P032876 | -1.678 | 7.32.E-05 | 8.48.E-03 |
|         |                    |        |           |           | 19101 | A_09_P032876 | -1.629 | 6.15.E-05 | 8.27.E-03 |
| Tollo   | CG6890_ESCL1_7040  | -3.335 | 8.69.E-28 | 1.74.E-23 | 6312  | A_09_P116390 | -2.387 | 2.20.E-05 | 6.56.E-03 |
|         |                    |        |           |           | 34858 | A_09_P191795 | -2.227 | 1.90.E-05 | 6.34.E-03 |
|         |                    |        |           |           | 1575  | A_09_P045751 | -1.753 | 4.89.E-04 | 1.70.E-02 |
| tw      | CG12311_ESCL1_2541 | -2.734 | 1.98.E-25 | 3.88.E-21 | 9814  | A_09_P048691 | -1.047 | 1.01.E-03 | 2.45.E-02 |
|         |                    |        |           |           | 898   | A_09_P048691 | -0.994 | 1.49.E-03 | 2.96.E-02 |
|         |                    |        |           |           | 19556 | A_09_P048691 | -0.981 | 1.41.E-03 | 2.86.E-02 |
|         |                    |        |           |           | 37239 | A_09_P048691 | -0.951 | 1.97.E-03 | 3.39.E-02 |
|         |                    |        |           |           | 35814 | A_09_P048691 | -0.929 | 1.48.E-03 | 2.95.E-02 |
|         |                    |        |           |           | 23014 | A_09_P048691 | -0.928 | 1.74.E-03 | 3.20.E-02 |
|         |                    |        |           |           | 13262 | A_09_P048691 | -0.921 | 1.99.E-03 | 3.40.E-02 |
|         |                    |        |           |           | 4101  | A_09_P048691 | -0.866 | 2.16.E-03 | 3.55.E-02 |
|         |                    |        |           |           | 17438 | A_09_P048691 | -0.861 | 3.09.E-03 | 4.09.E-02 |
|         |                    |        |           |           | 24847 | A_09_P048691 | -0.858 | 4.16.E-03 | 4.70.E-02 |
| tw      | CG12311_ESCL2_2229 | -1.349 | 2.85.E-31 | 5.92.E-27 | 9814  | A_09_P048691 | -1.047 | 1.01.E-03 | 2.45.E-02 |
|         |                    |        |           |           | 898   | A_09_P048691 | -0.994 | 1.49.E-03 | 2.96.E-02 |
|         |                    |        |           |           | 19556 | A_09_P048691 | -0.981 | 1.41.E-03 | 2.86.E-02 |
|         |                    |        |           |           | 37239 | A_09_P048691 | -0.951 | 1.97.E-03 | 3.39.E-02 |
|         |                    |        |           |           | 35814 | A_09_P048691 | -0.929 | 1.48.E-03 | 2.95.E-02 |
|         |                    |        |           |           | 23014 | A_09_P048691 | -0.928 | 1.74.E-03 | 3.20.E-02 |
|         |                    |        |           |           | 13262 | A_09_P048691 | -0.921 | 1.99.E-03 | 3.40.E-02 |
|         |                    |        |           |           | 4101  | A_09_P048691 | -0.866 | 2.16.E-03 | 3.55.E-02 |
|         |                    |        |           |           | 17438 | A_09_P048691 | -0.861 | 3.09.E-03 | 4.09.E-02 |
|         |                    |        |           |           | 24847 | A_09_P048691 | -0.858 | 4.16.E-03 | 4.70.E-02 |
| Ugt35a  | CG6644_ESCL1_1535  | -0.388 | 3.50.E-06 | 4.46.E-02 | 7652  | A_09_P078396 | -1.151 | 4.81.E-04 | 1.69.E-02 |
|         |                    |        |           |           | 44846 | A_09_P078396 | -1.016 | 1.91.E-03 | 3.34.E-02 |
| Ugt86Da | CG18578_ESCL1_1748 | -1.690 | 1.24.E-24 | 2.40.E-20 | 24564 | A_09_P062526 | -3.769 | 1.17.E-06 | 5.81.E-03 |
| Ugt86Da | CG18578_ESCL2_1522 | -1.466 | 1.36.E-19 | 2.47.E-15 | 24564 | A_09_P062526 | -3.769 | 1.17.E-06 | 5.81.E-03 |
| unc-115 | CG31332_ESCL1_2700 | -3.216 | 1.43.E-38 | 3.12.E-34 | 21073 | A_09_P073171 | -0.960 | 2.17.E-03 | 3.55.E-02 |

|         |                     |        |           |           |       |              |        |           |           |
|---------|---------------------|--------|-----------|-----------|-------|--------------|--------|-----------|-----------|
| unc-115 | CG31332_ESCL2_2293  | -0.582 | 3.06.E-09 | 4.42.E-05 | 21073 | A_09_P073171 | -0.960 | 2.17.E-03 | 3.55.E-02 |
| unc-115 | CG31352_ESCL1_3130  | -2.469 | 6.55.E-29 | 1.33.E-24 | 21073 | A_09_P073171 | -0.960 | 2.17.E-03 | 3.55.E-02 |
| unc-5   | CG8166_ESCL1_4927   | -3.662 | 1.16.E-43 | 2.58.E-39 | 44816 | A_09_P179550 | -1.300 | 1.98.E-04 | 1.18.E-02 |
| unc-5   | CG8166_ESCL2_3152   | -2.400 | 2.32.E-22 | 4.38.E-18 | 44816 | A_09_P179550 | -1.300 | 1.98.E-04 | 1.18.E-02 |
| vg      | CG3830_ESCL1_3667   | -1.857 | 3.82.E-12 | 6.00.E-08 | 33773 | A_09_P009991 | -1.668 | 2.24.E-03 | 3.60.E-02 |
|         |                     |        |           |           | 15442 | A_09_P009991 | -1.585 | 2.28.E-03 | 3.63.E-02 |
| vg      | CG3830_ESCL3_656    | -0.891 | 5.44.E-10 | 8.06.E-06 | 33773 | A_09_P009991 | -1.668 | 2.24.E-03 | 3.60.E-02 |
|         |                     |        |           |           | 15442 | A_09_P009991 | -1.585 | 2.28.E-03 | 3.63.E-02 |
| vir-1   | CG31764_ESCL1_1584  | -1.477 | 4.56.E-21 | 8.48.E-17 | 10243 | A_09_P056621 | -1.181 | 2.29.E-03 | 3.63.E-02 |
|         |                     |        |           |           | 33815 | A_09_P056616 | -1.096 | 2.32.E-03 | 3.64.E-02 |
|         |                     |        |           |           | 41688 | A_09_P056616 | -1.054 | 2.35.E-03 | 3.64.E-02 |
| vir-1   | CG31764_ESCL2_1202  | -0.768 | 1.27.E-13 | 2.07.E-09 | 10243 | A_09_P056621 | -1.181 | 2.29.E-03 | 3.63.E-02 |
|         |                     |        |           |           | 33815 | A_09_P056616 | -1.096 | 2.32.E-03 | 3.64.E-02 |
|         |                     |        |           |           | 41688 | A_09_P056616 | -1.054 | 2.35.E-03 | 3.64.E-02 |
| vir-1   | CG31764_ESCL3_1023  | -1.502 | 2.37.E-15 | 4.02.E-11 | 10243 | A_09_P056621 | -1.181 | 2.29.E-03 | 3.63.E-02 |
|         |                     |        |           |           | 33815 | A_09_P056616 | -1.096 | 2.32.E-03 | 3.64.E-02 |
|         |                     |        |           |           | 41688 | A_09_P056616 | -1.054 | 2.35.E-03 | 3.64.E-02 |
| vri     | CG14029_ESCL1_3258  | -2.096 | 1.61.E-22 | 3.04.E-18 | 7188  | A_09_P031491 | -1.107 | 4.68.E-03 | 5.00.E-02 |
| vri     | CG14029_ESCL2_1725  | -0.753 | 7.54.E-07 | 9.92.E-03 | 7188  | A_09_P031491 | -1.107 | 4.68.E-03 | 5.00.E-02 |
| vri     | CG14029_ESCL3_2928  | -2.841 | 3.46.E-26 | 6.82.E-22 | 7188  | A_09_P031491 | -1.107 | 4.68.E-03 | 5.00.E-02 |
| wb      | CG15288_ESCL1_10722 | -0.785 | 3.75.E-11 | 5.74.E-07 | 4966  | A_09_P171275 | -1.402 | 4.98.E-04 | 1.71.E-02 |
| wb      | CG15288_ESCL3_9821  | -0.545 | 4.50.E-11 | 6.88.E-07 | 4966  | A_09_P171275 | -1.402 | 4.98.E-04 | 1.71.E-02 |
| wnd     | CG8789_ESCL1_4180   | -1.440 | 5.49.E-25 | 1.07.E-20 | 33108 | A_09_P034701 | -1.114 | 8.55.E-04 | 2.25.E-02 |
| wnd     | CG8789_ESCL2_2836   | -0.826 | 5.13.E-07 | 6.81.E-03 | 33108 | A_09_P034701 | -1.114 | 8.55.E-04 | 2.25.E-02 |
| Wnt2    | CG1916_ESCL1_2135   | -2.372 | 1.96.E-30 | 4.03.E-26 | 6466  | A_09_P010341 | -1.165 | 1.29.E-03 | 2.75.E-02 |
| Wnt2    | CG1916_ESCL2_997    | -1.722 | 8.94.E-29 | 1.81.E-24 | 6466  | A_09_P010341 | -1.165 | 1.29.E-03 | 2.75.E-02 |
| Xbp1    | CG9415_ESCL1_1936   | -0.388 | 7.62.E-08 | 1.05.E-03 | 14073 | A_09_P196055 | -0.811 | 3.69.E-03 | 4.46.E-02 |
|         |                     |        |           |           | 13921 | A_09_P032791 | -0.781 | 4.23.E-03 | 4.73.E-02 |
| yrt     | CG9764_ESCL1_4239   | -0.662 | 7.65.E-17 | 1.33.E-12 | 44012 | A_09_P116530 | -0.838 | 4.21.E-03 | 4.73.E-02 |
| yrt     | CG9764_ESCL2_2845   | -1.420 | 4.91.E-24 | 9.47.E-20 | 44012 | A_09_P116530 | -0.838 | 4.21.E-03 | 4.73.E-02 |
| yrt     | CG9764_ESCL3_2576   | -2.222 | 2.00.E-46 | 4.46.E-42 | 44012 | A_09_P116530 | -0.838 | 4.21.E-03 | 4.73.E-02 |
| Z600    | CG17962_ESCL1_192   | -3.525 | 1.47.E-48 | 3.29.E-44 | 14931 | A_09_P010096 | -1.299 | 9.49.E-04 | 2.36.E-02 |
|         |                     |        |           |           | 42539 | A_09_P010096 | -1.267 | 1.93.E-03 | 3.36.E-02 |

Supplementary Table S6. List of PGC-enriched genes down-regulated in Ovo-B KD PGCs

\* This table shows names of genes expressed predominantly in PGCs (Adjusted p-value < 0.05; see SI Materials and Methods) that were significantly down-regulated in Ovo-B KD PGCs in comparison with control PGCs (q-value < 0.05; see SI Materials and Methods).

† The cell-type effect ( $C_i$ ) value was calculated using a linear model (see SI Materials and Methods).  $C_i$  represents the estimated fold change in PGCs relative to whole embryos (soma) in  $\log_2$  scale.

‡ The genotype effect ( $G_i$ ) value, or the estimated fold change in control PGCs vs Ovo-A-expressing PGCs in  $\log_2$  scale (Table S1) is shown again.

| Gene Name*  | Probe Name         | PGCs/soma                              |          |                  | Cont./OvoB KD     |              |                                            |           |           |
|-------------|--------------------|----------------------------------------|----------|------------------|-------------------|--------------|--------------------------------------------|-----------|-----------|
|             |                    | Cell-type effect†                      |          |                  | Genotype effect ‡ |              |                                            |           |           |
|             |                    | [Fold Change: $\log_2$<br>(PGCs/soma)] | p-value  | Adjusted p-value | Feature Number    | Probe Name   | [Fold Change: $\log_2$<br>(Cont./OvoB KD)] | p-value   | q-value   |
| adp         | CG5124_ESCL1_1812  | 1.161                                  | 1.47E-28 | 2.97.E-24        | 33391             | A_09_P041196 | 0.813                                      | 2.40.E-03 | 3.69.E-02 |
|             |                    |                                        |          |                  | 20001             | A_09_P041196 | 0.895                                      | 1.94.E-03 | 3.36.E-02 |
| adp         | CG5124_ESCL2_2098  | 1.265                                  | 3.08E-42 | 6.78.E-38        | 33391             | A_09_P041196 | 0.813                                      | 2.40.E-03 | 3.69.E-02 |
|             |                    |                                        |          |                  | 20001             | A_09_P041196 | 0.895                                      | 1.94.E-03 | 3.36.E-02 |
| alpha-Est10 | CG1131_ESCL1_1558  | 1.677                                  | 1.02E-20 | 1.90.E-16        | 3628              | A_09_P030956 | 1.877                                      | 3.64.E-05 | 7.50.E-03 |
|             |                    |                                        |          |                  | 25877             | A_09_P030956 | 1.936                                      | 2.32.E-04 | 1.25.E-02 |
|             |                    |                                        |          |                  | 19336             | A_09_P209670 | 2.395                                      | 6.88.E-05 | 8.27.E-03 |
| alpha-Est3  | CG1257_ESCL1_1535  | 2.498                                  | 2.34E-34 | 4.97.E-30        | 31459             | A_09_P197385 | 1.369                                      | 1.98.E-04 | 1.18.E-02 |
|             |                    |                                        |          |                  | 33181             | A_09_P197645 | 1.523                                      | 8.11.E-05 | 8.73.E-03 |
|             |                    |                                        |          |                  | 33886             | A_09_P030966 | 1.852                                      | 6.27.E-05 | 8.27.E-03 |
|             |                    |                                        |          |                  | 29917             | A_09_P030966 | 1.927                                      | 4.21.E-05 | 7.50.E-03 |
| alpha-Est4  | CG1082_ESCL1_1561  | 0.807                                  | 3.22E-11 | 4.95.E-07        | 19915             | A_09_P030971 | 0.841                                      | 3.34.E-03 | 4.24.E-02 |
| aub         | CG6137_ESCL1_2537  | 2.813                                  | 2.77E-59 | 6.25.E-55        | 18373             | A_09_P041376 | 1.177                                      | 8.98.E-04 | 2.30.E-02 |
|             |                    |                                        |          |                  | 24248             | A_09_P041376 | 1.195                                      | 1.37.E-03 | 2.83.E-02 |
| CG10747     | CG10747_ESCL1_1417 | 0.404                                  | 3.31E-11 | 5.07.E-07        | 11506             | A_09_P023676 | 0.900                                      | 3.45.E-03 | 4.30.E-02 |
|             |                    |                                        |          |                  | 16108             | A_09_P023676 | 0.991                                      | 1.98.E-03 | 3.39.E-02 |
| CG10747     | CG10747_ESCL2_876  | 0.650                                  | 1.82E-08 | 2.56.E-04        | 11506             | A_09_P023676 | 0.900                                      | 3.45.E-03 | 4.30.E-02 |
|             |                    |                                        |          |                  | 16108             | A_09_P023676 | 0.991                                      | 1.98.E-03 | 3.39.E-02 |
| CG11095     | CG11095_ESCL1_1038 | 0.978                                  | 8.54E-16 | 1.46.E-11        | 11846             | A_09_P038546 | 0.825                                      | 4.15.E-03 | 4.70.E-02 |
|             |                    |                                        |          |                  | 28679             | A_09_P038546 | 0.880                                      | 2.26.E-03 | 3.60.E-02 |
| CG11382     | CG11382_ESCL1_1336 | 1.551                                  | 9.90E-19 | 1.78.E-14        | 43541             | A_09_P062866 | 2.757                                      | 1.21.E-05 | 5.98.E-03 |
| CG11409     | CG11409_ESCL1_4051 | 2.127                                  | 1.23E-32 | 2.58.E-28        | 27879             | A_09_P076921 | 1.043                                      | 8.05.E-04 | 2.17.E-02 |
|             |                    |                                        |          |                  | 2094              | A_09_P076921 | 1.095                                      | 6.27.E-04 | 1.92.E-02 |
| CG11409     | CG11409_ESCL2_3772 | 1.534                                  | 6.47E-30 | 1.32.E-25        | 27879             | A_09_P076921 | 1.043                                      | 8.05.E-04 | 2.17.E-02 |
|             |                    |                                        |          |                  | 2094              | A_09_P076921 | 1.095                                      | 6.27.E-04 | 1.92.E-02 |
| CG11638     | CG11638_ESCL1_2319 | 3.253                                  | 1.28E-41 | 2.81.E-37        | 9106              | A_09_P062786 | 1.531                                      | 1.78.E-04 | 1.14.E-02 |
|             |                    |                                        |          |                  | 20495             | A_09_P062786 | 1.599                                      | 1.05.E-04 | 9.43.E-03 |
|             |                    |                                        |          |                  | 33878             | A_09_P199575 | 1.728                                      | 1.85.E-04 | 1.16.E-02 |
| CG11638     | CG11638_ESCL2_1032 | 2.942                                  | 1.19E-30 | 2.46.E-26        | 9106              | A_09_P062786 | 1.531                                      | 1.78.E-04 | 1.14.E-02 |
|             |                    |                                        |          |                  | 20495             | A_09_P062786 | 1.599                                      | 1.05.E-04 | 9.43.E-03 |
|             |                    |                                        |          |                  | 33878             | A_09_P199575 | 1.728                                      | 1.85.E-04 | 1.16.E-02 |
| CG12001     | CG12001_ESCL1_1881 | 1.087                                  | 5.23E-17 | 9.14.E-13        | 5986              | A_09_P036121 | 0.763                                      | 3.75.E-03 | 4.46.E-02 |
|             |                    |                                        |          |                  | 5986              | A_09_P036121 | 0.763                                      | 3.75.E-03 | 4.46.E-02 |
| CG12325     | CG12325_ESCL1_3040 | 0.618                                  | 9.09E-07 | 1.19.E-02        | 27057             | A_09_P06231  | 1.394                                      | 2.74.E-04 | 1.33.E-02 |
| CG12325     | CG12325_ESCL2_2706 | 0.676                                  | 7.00E-20 | 1.28.E-15        | 27057             | A_09_P06231  | 1.394                                      | 2.74.E-04 | 1.33.E-02 |
| CG12477     | CG12477_ESCL1_734  | 4.846                                  | 7.41E-38 | 1.61.E-33        | 24914             | A_09_P113955 | 0.767                                      | 3.68.E-03 | 4.45.E-02 |
| CG12499     | CG12499_ESCL1_6094 | 0.358                                  | 1.98E-07 | 2.68.E-03        | 1544              | A_09_P070216 | 0.754                                      | 4.51.E-03 | 4.91.E-02 |
|             |                    |                                        |          |                  | 4622              | A_09_P070216 | 0.768                                      | 4.08.E-03 | 4.66.E-02 |
| CG12744     | CG12744_ESCL1_830  | 1.004                                  | 2.00E-23 | 3.82.E-19        | 38336             | A_09_P005866 | 1.657                                      | 8.59.E-05 | 8.82.E-03 |
|             |                    |                                        |          |                  | 25426             | A_09_P005866 | 1.679                                      | 6.19.E-05 | 8.27.E-03 |
|             |                    |                                        |          |                  | 13616             | A_09_P150055 | 1.733                                      | 5.63.E-05 | 7.91.E-03 |
| CG12744     | CG12744_ESCL2_372  | 1.050                                  | 4.74E-26 | 9.34.E-22        | 38336             | A_09_P005866 | 1.657                                      | 8.59.E-05 | 8.82.E-03 |
|             |                    |                                        |          |                  | 25426             | A_09_P005866 | 1.679                                      | 6.19.E-05 | 8.27.E-03 |
|             |                    |                                        |          |                  | 13616             | A_09_P150055 | 1.733                                      | 5.63.E-05 | 7.91.E-03 |
| CG12851     | CG12851_ESCL1_3052 | 0.615                                  | 3.35E-06 | 4.27.E-02        | 12656             | A_09_P027781 | 1.171                                      | 3.43.E-04 | 1.45.E-02 |
|             |                    |                                        |          |                  | 4842              | A_09_P027781 | 1.208                                      | 3.53.E-04 | 1.46.E-02 |
| CG12972     | CG12972_ESCL1_872  | 0.648                                  | 2.64E-12 | 4.16.E-08        | 33256             | A_09_P035431 | 1.521                                      | 9.67.E-04 | 2.40.E-02 |
|             |                    |                                        |          |                  | 66                | A_09_P035431 | 1.596                                      | 9.89.E-04 | 2.42.E-02 |
| CG12991     | CG12991_ESCL1_2268 | 0.622                                  | 1.52E-10 | 2.28.E-06        | 29187             | A_09_P213420 | 0.777                                      | 2.97.E-03 | 4.02.E-02 |
| CG13350     | CG13350_ESCL1_2208 | 1.018                                  | 7.04E-24 | 1.36.E-19        | 28127             | A_09_P007501 | 0.858                                      | 2.09.E-03 | 3.49.E-02 |
|             |                    |                                        |          |                  | 34758             | A_09_P007501 | 0.863                                      | 2.70.E-03 | 3.84.E-02 |
| CG13350     | CG13350_ESCL2_2615 | 1.104                                  | 3.52E-35 | 7.52.E-31        | 28127             | A_09_P007501 | 0.858                                      | 2.09.E-03 | 3.49.E-02 |

|         |                    |       |          |           |       |              |       |           |           |
|---------|--------------------|-------|----------|-----------|-------|--------------|-------|-----------|-----------|
|         |                    |       |          |           | 34758 | A_09_P007501 | 0.863 | 2.70.E-03 | 3.84.E-02 |
| CG13741 | CG13741_ESCL1_1881 | 2.278 | 1.08E-34 | 2.30.E-30 | 24688 | A_09_P005567 | 1.182 | 8.01.E-04 | 2.17.E-02 |
| CG13741 | CG13741_ESCL2_965  | 2.148 | 4.23E-36 | 9.08.E-32 | 24688 | A_09_P005567 | 1.182 | 8.01.E-04 | 2.17.E-02 |
| CG1387  | CG1387_ESCL1_3324  | 1.134 | 3.55E-20 | 6.52.E-16 | 4865  | A_09_P068226 | 1.489 | 1.77.E-03 | 3.21.E-02 |
|         |                    |       |          |           | 12252 | A_09_P068226 | 1.615 | 3.15.E-03 | 4.13.E-02 |
| CG14512 | CG14512_ESCL1_454  | 0.616 | 4.87E-12 | 7.63.E-08 | 4728  | A_09_P060841 | 0.896 | 1.94.E-03 | 3.36.E-02 |
|         |                    |       |          |           | 6849  | A_09_P060841 | 0.954 | 2.02.E-03 | 3.43.E-02 |
| CG14516 | CG14516_ESCL1_3206 | 1.059 | 9.65E-26 | 1.90.E-21 | 7384  | A_09_P060846 | 2.718 | 7.15.E-06 | 5.81.E-03 |
| CG14516 | CG14516_ESCL2_2908 | 1.061 | 4.70E-29 | 9.55.E-25 | 7384  | A_09_P060846 | 2.718 | 7.15.E-06 | 5.81.E-03 |
| CG15172 | CG15172_ESCL1_284  | 5.164 | 3.33E-35 | 7.10.E-31 | 7144  | A_09_P023331 | 1.232 | 3.24.E-04 | 1.44.E-02 |
|         |                    |       |          |           | 9622  | A_09_P162685 | 1.244 | 4.01.E-04 | 1.55.E-02 |
| CG15390 | CG15390_ESCL1_661  | 0.715 | 2.62E-17 | 4.60.E-13 | 12051 | A_09_P018536 | 1.520 | 1.80.E-04 | 1.14.E-02 |
|         |                    |       |          |           | 21055 | A_09_P018536 | 1.596 | 1.19.E-04 | 9.80.E-03 |
| CG15771 | CG15771_ESCL1_989  | 0.845 | 4.04E-19 | 7.30.E-15 | 44341 | A_09_P067336 | 1.341 | 2.26.E-04 | 1.24.E-02 |
|         |                    |       |          |           | 7416  | A_09_P067336 | 1.371 | 2.08.E-04 | 1.19.E-02 |
| CG15771 | CGX0749_ESCL1_717  | 1.162 | 3.59E-12 | 5.66.E-08 | 44341 | A_09_P067336 | 1.341 | 2.26.E-04 | 1.24.E-02 |
|         |                    |       |          |           | 7416  | A_09_P067336 | 1.371 | 2.08.E-04 | 1.19.E-02 |
| CG1640  | CG1640_ESCL1_2440  | 1.036 | 9.87E-17 | 1.71.E-12 | 32178 | A_09_P038366 | 0.802 | 2.82.E-03 | 3.94.E-02 |
|         |                    |       |          |           | 4906  | A_09_P038366 | 0.868 | 1.77.E-03 | 3.21.E-02 |
| CG1640  | CG1640_ESCL2_1642  | 0.800 | 2.34E-20 | 4.30.E-16 | 32178 | A_09_P038366 | 0.802 | 2.82.E-03 | 3.94.E-02 |
|         |                    |       |          |           | 4906  | A_09_P038366 | 0.868 | 1.77.E-03 | 3.21.E-02 |
| CG30409 | CG30409_ESCL1_536  | 2.888 | 3.63E-15 | 6.11.E-11 | 31581 | A_09_P058351 | 0.761 | 4.04.E-03 | 4.64.E-02 |
| CG31472 | CG31472_ESCL2_639  | 0.529 | 1.59E-12 | 2.52.E-08 | 20911 | A_09_P059946 | 2.235 | 3.31.E-05 | 7.50.E-03 |
| CG31861 | CG31861_ESCL1_415  | 0.540 | 8.03E-08 | 1.10.E-03 | 25457 | A_09_P166490 | 1.010 | 1.22.E-03 | 2.68.E-02 |
| CG32164 | CG32164_ESCL1_3550 | 1.221 | 1.39E-22 | 2.64.E-18 | 25128 | A_09_P191830 | 0.772 | 4.21.E-03 | 4.73.E-02 |
|         |                    |       |          |           | 29899 | A_09_P162230 | 0.802 | 4.61.E-03 | 4.97.E-02 |
| CG32164 | CG32164_ESCL2_3168 | 1.202 | 4.65E-35 | 9.92.E-31 | 25128 | A_09_P191830 | 0.772 | 4.21.E-03 | 4.73.E-02 |
|         |                    |       |          |           | 29899 | A_09_P162230 | 0.802 | 4.61.E-03 | 4.97.E-02 |
| CG32164 | CG32165_ESCL1_3171 | 1.188 | 6.96E-22 | 1.31.E-17 | 25128 | A_09_P191830 | 0.772 | 4.21.E-03 | 4.73.E-02 |
|         |                    |       |          |           | 29899 | A_09_P162230 | 0.802 | 4.61.E-03 | 4.97.E-02 |
| CG32318 | CG9187_ESCL1_492   | 0.863 | 4.70E-15 | 7.90.E-11 | 306   | A_09_P015271 | 1.475 | 1.94.E-04 | 1.17.E-02 |
| CG32373 | CG32373_ESCL1_1364 | 2.948 | 2.43E-37 | 5.25.E-33 | 44782 | A_09_P015371 | 1.192 | 8.63.E-04 | 2.26.E-02 |
|         |                    |       |          |           | 15630 | A_09_P015371 | 1.228 | 7.25.E-04 | 2.05.E-02 |
| CG32719 | CG32719_ESCL1_3596 | 0.510 | 1.25E-06 | 1.63.E-02 | 2626  | A_09_P016331 | 2.965 | 2.85.E-03 | 3.96.E-02 |
| CG3362  | CG3362_ESCL1_1397  | 0.988 | 4.73E-26 | 9.31.E-22 | 41816 | A_09_P027401 | 1.153 | 1.77.E-03 | 3.21.E-02 |
|         |                    |       |          |           | 5434  | A_09_P027401 | 1.315 | 4.37.E-04 | 1.62.E-02 |
| CG3362  | CG3362_ESCL2_818   | 1.026 | 2.72E-30 | 5.59.E-26 | 41816 | A_09_P027401 | 1.153 | 1.77.E-03 | 3.21.E-02 |
|         |                    |       |          |           | 5434  | A_09_P027401 | 1.315 | 4.37.E-04 | 1.62.E-02 |
| CG3371  | CG3371_ESCL1_2231  | 1.991 | 9.94E-41 | 2.18.E-36 | 29906 | A_09_P028056 | 1.308 | 2.25.E-04 | 1.24.E-02 |
|         |                    |       |          |           | 39863 | A_09_P028056 | 1.348 | 2.44.E-04 | 1.26.E-02 |
| CG3371  | CG3371_ESCL2_1664  | 1.943 | 1.93E-44 | 4.28.E-40 | 29906 | A_09_P028056 | 1.308 | 2.25.E-04 | 1.24.E-02 |
|         |                    |       |          |           | 39863 | A_09_P028056 | 1.348 | 2.44.E-04 | 1.26.E-02 |
| CG34353 | CG12274_ESCL1_140  | 1.134 | 5.65E-15 | 9.47.E-11 | 9772  | A_09_P218190 | 2.469 | 4.79.E-04 | 1.68.E-02 |
|         |                    |       |          |           | 38372 | A_09_P003906 | 3.230 | 8.79.E-06 | 5.81.E-03 |
|         |                    |       |          |           | 13762 | A_09_P003906 | 3.230 | 2.39.E-05 | 6.83.E-03 |
|         |                    |       |          |           | 8163  | A_09_P205315 | 3.778 | 2.13.E-05 | 6.43.E-03 |
| CG34353 | CG12427_ESCL1_122  | 1.846 | 1.54E-25 | 3.02.E-21 | 9772  | A_09_P218190 | 2.469 | 4.79.E-04 | 1.68.E-02 |
|         |                    |       |          |           | 38372 | A_09_P003906 | 3.230 | 8.79.E-06 | 5.81.E-03 |
|         |                    |       |          |           | 13762 | A_09_P003906 | 3.230 | 2.39.E-05 | 6.83.E-03 |
|         |                    |       |          |           | 8163  | A_09_P205315 | 3.778 | 2.13.E-05 | 6.43.E-03 |
| CG34353 | CG12875_ESCL1_664  | 1.481 | 7.56E-19 | 1.36.E-14 | 9772  | A_09_P218190 | 2.469 | 4.79.E-04 | 1.68.E-02 |
|         |                    |       |          |           | 38372 | A_09_P003906 | 3.230 | 8.79.E-06 | 5.81.E-03 |
|         |                    |       |          |           | 13762 | A_09_P003906 | 3.230 | 2.39.E-05 | 6.83.E-03 |
|         |                    |       |          |           | 8163  | A_09_P205315 | 3.778 | 2.13.E-05 | 6.43.E-03 |
| CG3608  | CG3608_ESCL1_1465  | 0.513 | 2.11E-10 | 3.16.E-06 | 28936 | A_09_P027621 | 1.055 | 1.40.E-03 | 2.86.E-02 |
|         |                    |       |          |           | 23658 | A_09_P027621 | 1.095 | 1.01.E-03 | 2.45.E-02 |
| CG3609  | CG3609_ESCL1_930   | 0.485 | 3.60E-15 | 6.07.E-11 | 35091 | A_09_P018531 | 0.841 | 2.63.E-03 | 3.81.E-02 |
|         |                    |       |          |           | 25888 | A_09_P130625 | 1.385 | 2.96.E-04 | 1.37.E-02 |
| CG40006 | CG40006_ESCL1_2397 | 0.947 | 3.36E-09 | 4.85.E-05 | 7415  | A_09_P001241 | 0.918 | 3.88.E-03 | 4.54.E-02 |
|         |                    |       |          |           | 18487 | A_09_P001241 | 1.048 | 1.90.E-03 | 3.33.E-02 |
| CG40006 | CG40006_ESCL2_1996 | 1.013 | 2.57E-18 | 4.58.E-14 | 7415  | A_09_P001241 | 0.918 | 3.88.E-03 | 4.54.E-02 |
|         |                    |       |          |           | 18487 | A_09_P001241 | 1.048 | 1.90.E-03 | 3.33.E-02 |
| CG42340 | CG3367_ESCL1_1385  | 0.923 | 1.93E-13 | 3.13.E-09 | 2364  | A_09_P067626 | 0.835 | 3.09.E-03 | 4.09.E-02 |
|         |                    |       |          |           | 34853 | A_09_P067626 | 0.867 | 2.11.E-03 | 3.51.E-02 |
|         |                    |       |          |           | 39219 | A_09_P067626 | 0.869 | 2.11.E-03 | 3.51.E-02 |
|         |                    |       |          |           | 7761  | A_09_P067626 | 0.870 | 1.98.E-03 | 3.39.E-02 |
|         |                    |       |          |           | 37777 | A_09_P067626 | 0.871 | 1.88.E-03 | 3.32.E-02 |
|         |                    |       |          |           | 11612 | A_09_P067626 | 0.874 | 1.57.E-03 | 3.04.E-02 |
|         |                    |       |          |           | 25659 | A_09_P179810 | 0.881 | 2.99.E-03 | 4.02.E-02 |

|                |                    |       |          |           |       |              |       |           |           |
|----------------|--------------------|-------|----------|-----------|-------|--------------|-------|-----------|-----------|
|                |                    |       |          |           | 34396 | A_09_P067626 | 0.890 | 1.93.E-03 | 3.36.E-02 |
|                |                    |       |          |           | 1333  | A_09_P067626 | 0.904 | 1.41.E-03 | 2.87.E-02 |
|                |                    |       |          |           | 10010 | A_09_P067626 | 0.911 | 1.30.E-03 | 2.76.E-02 |
|                |                    |       |          |           | 19303 | A_09_P067626 | 0.970 | 1.27.E-03 | 2.72.E-02 |
| CG42404        | CG4285_ESCL1_4492  | 0.865 | 9.13E-15 | 1.53.E-10 | 19986 | A_09_P118075 | 1.097 | 1.79.E-03 | 3.22.E-02 |
|                |                    |       |          |           | 33659 | A_09_P075361 | 1.713 | 5.71.E-05 | 7.93.E-03 |
|                |                    |       |          |           | 2884  | A_09_P075361 | 1.733 | 6.86.E-05 | 8.27.E-03 |
| CG42404        | CG4285_ESCL2_2928  | 0.738 | 3.47E-11 | 5.31.E-07 | 19986 | A_09_P118075 | 1.097 | 1.79.E-03 | 3.22.E-02 |
|                |                    |       |          |           | 33659 | A_09_P075361 | 1.713 | 5.71.E-05 | 7.93.E-03 |
|                |                    |       |          |           | 2884  | A_09_P075361 | 1.733 | 6.86.E-05 | 8.27.E-03 |
| CG4250         | CG4250_ESCL1_449   | 0.608 | 1.18E-06 | 1.53.E-02 | 17026 | A_09_P026601 | 1.240 | 6.53.E-04 | 1.96.E-02 |
|                |                    |       |          |           | 26369 | A_09_P026601 | 1.268 | 5.86.E-04 | 1.87.E-02 |
| CG4306         | CG4306_ESCL1_696   | 1.028 | 1.24E-08 | 1.75.E-04 | 34057 | A_09_P034261 | 1.549 | 5.80.E-04 | 1.85.E-02 |
|                |                    |       |          |           | 10242 | A_09_P034261 | 1.627 | 4.66.E-04 | 1.67.E-02 |
| CG4306         | CG4306_ESCL2_587   | 1.070 | 2.10E-08 | 2.94.E-04 | 34057 | A_09_P034261 | 1.549 | 5.80.E-04 | 1.85.E-02 |
|                |                    |       |          |           | 10242 | A_09_P034261 | 1.627 | 4.66.E-04 | 1.67.E-02 |
| CG4771         | CG4771_ESCL1_2096  | 1.825 | 5.22E-33 | 1.10.E-28 | 17900 | A_09_P070396 | 1.074 | 2.22.E-03 | 3.60.E-02 |
| CG4771         | CG4771_ESCL2_1888  | 1.693 | 1.04E-44 | 2.30.E-40 | 17900 | A_09_P070396 | 1.074 | 2.22.E-03 | 3.60.E-02 |
| CG5018         | CG5018_ESCL1_1880  | 0.343 | 2.23E-06 | 2.87.E-02 | 27695 | A_09_P033426 | 0.811 | 2.50.E-03 | 3.74.E-02 |
|                |                    |       |          |           | 25431 | A_09_P033426 | 0.814 | 2.23.E-03 | 3.60.E-02 |
| CG5535         | CG5535_ESCL1_1662  | 1.050 | 1.87E-23 | 3.59.E-19 | 32674 | A_09_P034156 | 0.849 | 3.13.E-03 | 4.11.E-02 |
|                |                    |       |          |           | 27855 | A_09_P034156 | 0.891 | 2.96.E-03 | 4.01.E-02 |
| CG6084         | CG6084_ESCL1_1240  | 1.577 | 3.53E-32 | 7.38.E-28 | 42697 | A_09_P048596 | 1.008 | 1.49.E-03 | 2.96.E-02 |
|                |                    |       |          |           | 29180 | A_09_P048596 | 1.053 | 8.39.E-04 | 2.22.E-02 |
| CG6084         | CG6084_ESCL2_931   | 1.846 | 5.60E-38 | 1.21.E-33 | 42697 | A_09_P048596 | 1.008 | 1.49.E-03 | 2.96.E-02 |
|                |                    |       |          |           | 29180 | A_09_P048596 | 1.053 | 8.39.E-04 | 2.22.E-02 |
| CG6195         | CG6195_ESCL1_885   | 1.609 | 6.82E-41 | 1.50.E-36 | 18986 | A_09_P191375 | 1.062 | 1.73.E-03 | 3.20.E-02 |
|                |                    |       |          |           | 10030 | A_09_P069266 | 1.365 | 3.78.E-04 | 1.51.E-02 |
| CG6763         | CG6763_ESCL1_974   | 1.812 | 8.76E-39 | 1.90.E-34 | 24089 | A_09_P070606 | 0.929 | 1.99.E-03 | 3.40.E-02 |
| CG6763         | CG6763_ESCL2_1889  | 2.004 | 1.61E-25 | 3.16.E-21 | 24089 | A_09_P070606 | 0.929 | 1.99.E-03 | 3.40.E-02 |
| CG6770         | CG6770_ESCL1_661   | 2.501 | 1.43E-48 | 3.21.E-44 | 26719 | A_09_P022166 | 1.024 | 1.19.E-03 | 2.65.E-02 |
|                |                    |       |          |           | 19985 | A_09_P196000 | 1.137 | 4.69.E-04 | 1.67.E-02 |
| CG6770         | CG6770_ESCL2_140   | 1.742 | 4.25E-39 | 9.27.E-35 | 26719 | A_09_P022166 | 1.024 | 1.19.E-03 | 2.65.E-02 |
|                |                    |       |          |           | 19985 | A_09_P196000 | 1.137 | 4.69.E-04 | 1.67.E-02 |
| CG9004         | CG9004_ESCL1_2433  | 0.286 | 1.12E-06 | 1.46.E-02 | 43659 | A_09_P028731 | 1.185 | 2.37.E-03 | 3.66.E-02 |
|                |                    |       |          |           | 14338 | A_09_P028731 | 1.225 | 1.41.E-03 | 2.86.E-02 |
| CG9101         | CG9101_ESCL1_413   | 0.522 | 1.17E-07 | 1.60.E-03 | 3504  | A_09_P130125 | 1.018 | 9.40.E-04 | 2.36.E-02 |
| CycJ           | CG10308_ESCL1_1340 | 3.664 | 2.52E-52 | 5.66.E-48 | 12139 | A_09_P012226 | 0.854 | 3.36.E-03 | 4.25.E-02 |
|                |                    |       |          |           | 38547 | A_09_P012226 | 0.910 | 2.63.E-03 | 3.81.E-02 |
| CycJ           | CG10308_ESCL2_1022 | 2.134 | 3.10E-28 | 6.24.E-24 | 12139 | A_09_P012226 | 0.854 | 3.36.E-03 | 4.25.E-02 |
|                |                    |       |          |           | 38547 | A_09_P012226 | 0.910 | 2.63.E-03 | 3.81.E-02 |
| Cyp6a20        | CG10245_ESCL1_1472 | 0.867 | 1.49E-07 | 2.03.E-03 | 41546 | A_09_P007841 | 1.384 | 2.73.E-04 | 1.33.E-02 |
|                |                    |       |          |           | 3199  | A_09_P007841 | 1.437 | 1.90.E-04 | 1.17.E-02 |
|                |                    |       |          |           | 25399 | A_09_P132155 | 1.783 | 1.03.E-04 | 9.38.E-03 |
| Cyp6a20        | CG10245_ESCL2_1196 | 0.685 | 4.85E-12 | 7.61.E-08 | 41546 | A_09_P007841 | 1.384 | 2.73.E-04 | 1.33.E-02 |
|                |                    |       |          |           | 3199  | A_09_P007841 | 1.437 | 1.90.E-04 | 1.17.E-02 |
|                |                    |       |          |           | 25399 | A_09_P132155 | 1.783 | 1.03.E-04 | 9.38.E-03 |
| dl             | CG6667_ESCL3_1972  | 0.412 | 9.93E-07 | 1.30.E-02 | 9978  | A_09_P181510 | 1.007 | 8.68.E-04 | 2.26.E-02 |
|                |                    |       |          |           | 2378  | A_09_P119495 | 1.441 | 9.43.E-04 | 2.36.E-02 |
|                |                    |       |          |           | 2019  | A_09_P041991 | 1.544 | 1.20.E-03 | 2.66.E-02 |
|                |                    |       |          |           | 45180 | A_09_P041991 | 1.652 | 8.48.E-04 | 2.23.E-02 |
| DNApol-alpha73 | CG5923_ESCL1_1770  | 0.635 | 2.86E-13 | 4.64.E-09 | 9531  | A_09_P011801 | 0.768 | 4.40.E-03 | 4.85.E-02 |
| fal            | CG9670_ESCL1_1561  | 0.734 | 6.50E-18 | 1.15.E-13 | 14063 | A_09_P064906 | 0.783 | 4.66.E-03 | 4.99.E-02 |
| fal            | CG9670_ESCL2_1197  | 0.897 | 6.07E-32 | 1.27.E-27 | 14063 | A_09_P064906 | 0.783 | 4.66.E-03 | 4.99.E-02 |
| fs(1)M3        | CG4790_ESCL1_5206  | 1.543 | 4.97E-26 | 9.80.E-22 | 3686  | A_09_P011436 | 4.079 | 3.78.E-06 | 5.81.E-03 |
|                |                    |       |          |           | 26649 | A_09_P011436 | 4.160 | 4.04.E-06 | 5.81.E-03 |
| Fsh            | CG7665_ESCL1_3068  | 0.908 | 1.79E-13 | 2.92.E-09 | 28808 | A_09_P031551 | 1.909 | 3.06.E-05 | 7.10.E-03 |
|                |                    |       |          |           | 24107 | A_09_P031551 | 2.001 | 4.21.E-05 | 7.50.E-03 |
| gammaTub37C    | CG17566_ESCL1_1293 | 1.416 | 4.29E-24 | 8.27.E-20 | 39685 | A_09_P011941 | 1.848 | 1.14.E-04 | 9.57.E-03 |
| Gycalpha99B    | CG1912_ESCL2_1952  | 1.953 | 2.85E-21 | 5.31.E-17 | 23342 | A_09_P029986 | 1.105 | 4.30.E-03 | 4.78.E-02 |
|                |                    |       |          |           | 20483 | A_09_P029986 | 1.122 | 4.61.E-04 | 1.66.E-02 |
| hoip           | CG3949_ESCL1_318   | 1.450 | 1.34E-24 | 2.59.E-20 | 30094 | A_09_P030816 | 0.783 | 4.54.E-03 | 4.93.E-02 |
| kkv            | CG2666_ESCL1_5223  | 2.460 | 2.13E-34 | 4.53.E-30 | 38044 | A_09_P042961 | 1.727 | 6.54.E-05 | 8.27.E-03 |
|                |                    |       |          |           | 6851  | A_09_P042961 | 1.901 | 7.46.E-05 | 8.48.E-03 |
| kkv            | CG2666_ESCL2_4662  | 1.901 | 1.48E-28 | 2.99.E-24 | 38044 | A_09_P042961 | 1.727 | 6.54.E-05 | 8.27.E-03 |
|                |                    |       |          |           | 6851  | A_09_P042961 | 1.901 | 7.46.E-05 | 8.48.E-03 |
| l(1)G0196      | CG14616_ESCL2_5188 | 0.718 | 2.10E-20 | 3.87.E-16 | 38469 | A_09_P079166 | 0.921 | 1.20.E-03 | 2.66.E-02 |
|                |                    |       |          |           | 34522 | A_09_P180275 | 0.956 | 1.66.E-03 | 3.13.E-02 |
|                |                    |       |          |           | 29336 | A_09_P079166 | 0.967 | 9.67.E-04 | 2.40.E-02 |

|            |                    |       |          |          |       |              |       |          |          |
|------------|--------------------|-------|----------|----------|-------|--------------|-------|----------|----------|
|            |                    |       |          |          | 39621 | A_09_P225480 | 0.990 | 1.55E-03 | 3.03E-02 |
| l(2)35Df   | CG4152_ESCL1_3524  | 0.656 | 6.67E-07 | 8.80E-03 | 16061 | A_09_P043151 | 0.813 | 2.61E-03 | 3.80E-02 |
|            |                    |       |          |          | 24851 | A_09_P043151 | 0.916 | 3.60E-03 | 4.39E-02 |
| l(2)35Df   | CG4152_ESCL2_3095  | 0.550 | 1.31E-17 | 2.30E-13 | 16061 | A_09_P043151 | 0.813 | 2.61E-03 | 3.80E-02 |
|            |                    |       |          |          | 24851 | A_09_P043151 | 0.916 | 3.60E-03 | 4.39E-02 |
| l(2)tid    | CG5504_ESCL1_1944  | 1.301 | 2.20E-38 | 4.78E-34 | 21765 | A_09_P043231 | 0.754 | 4.07E-03 | 4.66E-02 |
| l(2)tid    | CG5504_ESCL2_1416  | 1.317 | 6.68E-32 | 1.39E-27 | 21765 | A_09_P043231 | 0.754 | 4.07E-03 | 4.66E-02 |
| La         | CG10922_ESCL1_1252 | 1.601 | 5.75E-41 | 1.26E-36 | 29968 | A_09_P013281 | 0.724 | 4.30E-03 | 4.78E-02 |
| La         | CG10922_ESCL2_1483 | 1.849 | 3.69E-41 | 8.10E-37 | 29968 | A_09_P013281 | 0.724 | 4.30E-03 | 4.78E-02 |
| La         | CG10922_ESCL3_1063 | 1.867 | 1.61E-44 | 3.58E-40 | 29968 | A_09_P013281 | 0.724 | 4.30E-03 | 4.78E-02 |
| Lasp       | CG3849_ESCL2_1403  | 0.692 | 1.69E-08 | 2.38E-04 | 35348 | A_09_P001951 | 0.874 | 2.26E-03 | 3.60E-02 |
|            |                    |       |          |          | 4661  | A_09_P137855 | 0.907 | 2.95E-03 | 4.01E-02 |
|            |                    |       |          |          | 15322 | A_09_P001951 | 0.952 | 1.44E-03 | 2.91E-02 |
| lectin-33A | CG16834_ESCL1_264  | 0.938 | 1.22E-08 | 1.73E-04 | 43505 | A_09_P062351 | 1.142 | 1.20E-03 | 2.66E-02 |
|            |                    |       |          |          | 7649  | A_09_P062351 | 1.234 | 7.43E-04 | 2.09E-02 |
| metl       | CG13929_ESCL1_823  | 0.386 | 9.34E-09 | 1.33E-04 | 1968  | A_09_P196905 | 0.959 | 1.40E-03 | 2.85E-02 |
| mtg        | CG7549_ESCL1_1958  | 2.259 | 3.56E-37 | 7.67E-33 | 22590 | A_09_P072466 | 1.240 | 3.87E-04 | 1.53E-02 |
|            |                    |       |          |          | 7546  | A_09_P072466 | 1.322 | 2.06E-04 | 1.19E-02 |
| mtg        | CG7549_ESCL2_1341  | 1.253 | 4.12E-20 | 7.55E-16 | 22590 | A_09_P072466 | 1.240 | 3.87E-04 | 1.53E-02 |
|            |                    |       |          |          | 7546  | A_09_P072466 | 1.322 | 2.06E-04 | 1.19E-02 |
| NaCP60E    | CG18506_ESCL2_873  | 0.995 | 4.92E-17 | 8.60E-13 | 36318 | A_09_P204800 | 0.782 | 3.09E-03 | 4.09E-02 |
| NaCP60E    | CG9071_ESCL2_1590  | 0.905 | 4.61E-12 | 7.23E-08 | 36318 | A_09_P204800 | 0.782 | 3.09E-03 | 4.09E-02 |
| Nhe3       | CG11328_ESCL1_3622 | 1.229 | 1.39E-28 | 2.82E-24 | 43568 | A_09_P187125 | 0.781 | 3.77E-03 | 4.47E-02 |
|            |                    |       |          |          | 28789 | A_09_P065686 | 0.955 | 2.32E-03 | 3.64E-02 |
|            |                    |       |          |          | 34865 | A_09_P065686 | 0.956 | 2.26E-03 | 3.60E-02 |
|            |                    |       |          |          | 42615 | A_09_P065681 | 1.084 | 2.27E-03 | 3.60E-02 |
|            |                    |       |          |          | 29367 | A_09_P065681 | 1.166 | 8.39E-04 | 2.22E-02 |
| nht        | CG15259_ESCL1_709  | 1.216 | 2.55E-15 | 4.31E-11 | 6091  | A_09_P111250 | 1.386 | 3.35E-03 | 4.25E-02 |
|            |                    |       |          |          | 28189 | A_09_P064001 | 1.395 | 1.01E-03 | 2.45E-02 |
|            |                    |       |          |          | 22204 | A_09_P064001 | 1.447 | 1.51E-04 | 1.05E-02 |
| nrv3       | CG8663_ESCL1_1464  | 0.822 | 1.02E-06 | 1.33E-02 | 14276 | A_09_P194020 | 1.142 | 4.34E-04 | 1.61E-02 |
|            |                    |       |          |          | 40071 | A_09_P194995 | 1.574 | 7.46E-05 | 8.48E-03 |
|            |                    |       |          |          | 11261 | A_09_P183115 | 1.644 | 1.09E-04 | 9.43E-03 |
| nrv3       | CG8663_ESCL2_873   | 0.991 | 6.60E-07 | 8.71E-03 | 14276 | A_09_P194020 | 1.142 | 4.34E-04 | 1.61E-02 |
|            |                    |       |          |          | 40071 | A_09_P194995 | 1.574 | 7.46E-05 | 8.48E-03 |
|            |                    |       |          |          | 11261 | A_09_P183115 | 1.644 | 1.09E-04 | 9.43E-03 |
| nwk        | CG4641_ESCL2_773   | 0.466 | 6.81E-08 | 9.38E-04 | 27310 | A_09_P054251 | 2.487 | 3.54E-04 | 1.46E-02 |
|            |                    |       |          |          | 23671 | A_09_P054251 | 2.596 | 4.11E-04 | 1.57E-02 |
| orb        | CG10868_ESCL2_2673 | 0.575 | 6.20E-11 | 9.43E-07 | 37166 | A_09_P011246 | 0.984 | 1.09E-03 | 2.54E-02 |
|            |                    |       |          |          | 20239 | A_09_P050141 | 1.252 | 2.60E-04 | 1.29E-02 |
|            |                    |       |          |          | 34906 | A_09_P182220 | 1.611 | 3.29E-04 | 1.45E-02 |
|            |                    |       |          |          | 16291 | A_09_P011251 | 1.774 | 1.57E-04 | 1.07E-02 |
| ovo        | CG6824_ESCL1_5416  | 1.688 | 2.57E-32 | 5.37E-28 | 24176 | A_09_P134245 | 2.995 | 1.38E-05 | 6.14E-03 |
|            | CG6824_ESCL2_3972  | 1.354 | 1.25E-11 | 1.94E-07 | 24176 | A_09_P134245 | 2.995 | 1.38E-05 | 6.14E-03 |
| pex13      | CG4663_ESCL2_1191  | 0.444 | 5.06E-10 | 7.50E-06 | 41711 | A_09_P007186 | 0.730 | 4.65E-03 | 4.99E-02 |
| piwi       | CG6122_ESCL1_2934  | 2.811 | 4.18E-47 | 9.33E-43 | 12346 | A_09_P011196 | 0.727 | 4.25E-03 | 4.75E-02 |
| piwi       | CG6122_ESCL2_2466  | 3.045 | 5.30E-60 | 1.20E-55 | 12346 | A_09_P011196 | 0.727 | 4.25E-03 | 4.75E-02 |
| qin        | CG14303_ESCL1_5119 | 2.644 | 1.95E-38 | 4.23E-34 | 42962 | A_09_P068931 | 0.821 | 2.95E-03 | 4.01E-02 |
|            |                    |       |          |          | 13327 | A_09_P068931 | 0.828 | 2.29E-03 | 3.63E-02 |
|            |                    |       |          |          | 27447 | A_09_P206515 | 1.060 | 9.47E-04 | 2.36E-02 |
|            |                    |       |          |          | 42009 | A_09_P163755 | 1.145 | 6.23E-04 | 1.92E-02 |
| qin        | CG14303_ESCL2_4520 | 2.428 | 2.25E-24 | 4.36E-20 | 42962 | A_09_P068931 | 0.821 | 2.95E-03 | 4.01E-02 |
|            |                    |       |          |          | 13327 | A_09_P068931 | 0.828 | 2.29E-03 | 3.63E-02 |
|            |                    |       |          |          | 27447 | A_09_P206515 | 1.060 | 9.47E-04 | 2.36E-02 |
|            |                    |       |          |          | 42009 | A_09_P163755 | 1.145 | 6.23E-04 | 1.92E-02 |
| r-1        | CG3593_ESCL1_1919  | 0.370 | 3.17E-06 | 4.05E-02 | 21963 | A_09_P044421 | 0.811 | 2.35E-03 | 3.64E-02 |
| r-1        | CG3593_ESCL2_1200  | 0.524 | 2.54E-14 | 4.20E-10 | 21963 | A_09_P044421 | 0.811 | 2.35E-03 | 3.64E-02 |
| RecQ4      | CG7487_ESCL1_4676  | 0.688 | 3.87E-12 | 6.08E-08 | 3236  | A_09_P049651 | 0.802 | 2.42E-03 | 3.69E-02 |
| RecQ4      | CG7487_ESCL2_1393  | 1.007 | 1.86E-11 | 2.88E-07 | 3236  | A_09_P049651 | 0.802 | 2.42E-03 | 3.69E-02 |
| rhi        | CG10683_ESCL2_1169 | 0.457 | 1.79E-06 | 2.32E-02 | 42902 | A_09_P010496 | 0.869 | 2.84E-03 | 3.95E-02 |
|            |                    |       |          |          | 33161 | A_09_P010496 | 0.925 | 1.49E-03 | 2.96E-02 |
| RpL22-like | CG9871_ESCL1_1090  | 5.821 | 6.81E-29 | 1.38E-24 | 32995 | A_09_P026846 | 0.764 | 3.76E-03 | 4.47E-02 |
|            |                    |       |          |          | 2427  | A_09_P026846 | 0.823 | 2.35E-03 | 3.64E-02 |
| RpL22-like | CG9871_ESCL2_317   | 4.243 | 2.66E-35 | 5.68E-31 | 32995 | A_09_P026846 | 0.764 | 3.76E-03 | 4.47E-02 |
|            |                    |       |          |          | 2427  | A_09_P026846 | 0.823 | 2.35E-03 | 3.64E-02 |
| RpL22-like | CG9871_ESCL3_1086  | 4.829 | 6.25E-28 | 1.26E-23 | 32995 | A_09_P026846 | 0.764 | 3.76E-03 | 4.47E-02 |
|            |                    |       |          |          | 2427  | A_09_P026846 | 0.823 | 2.35E-03 | 3.64E-02 |
| Rpt4R      | CG7257_ESCL1_1098  | 4.614 | 4.32E-36 | 9.27E-32 | 31156 | A_09_P055181 | 1.722 | 4.91E-05 | 7.55E-03 |
|            |                    |       |          |          | 536   | A_09_P055181 | 1.814 | 6.76E-05 | 8.27E-03 |



|          |                    |       |          |           |       |              |       |           |           |
|----------|--------------------|-------|----------|-----------|-------|--------------|-------|-----------|-----------|
| Sip1     | CG10939_ESCL1_1577 | 0.806 | 4.06E-21 | 7.55.E-17 | 2122  | A_09_P012691 | 2.171 | 1.68.E-05 | 6.14.E-03 |
| Sip1     | CG10939_ESCL2_807  | 1.064 | 1.89E-25 | 3.70.E-21 | 2122  | A_09_P012691 | 2.171 | 1.68.E-05 | 6.14.E-03 |
| SK       | CG10706_ESCL2_4724 | 1.497 | 2.62E-22 | 4.94.E-18 | 5891  | A_09_P067206 | 1.118 | 1.65.E-03 | 3.11.E-02 |
|          |                    |       |          |           | 10575 | A_09_P140795 | 1.198 | 4.73.E-04 | 1.67.E-02 |
|          |                    |       |          |           | 20577 | A_09_P067206 | 1.660 | 2.43.E-04 | 1.26.E-02 |
| Sod      | CG11793_ESCL1_671  | 0.366 | 2.70E-09 | 3.91.E-05 | 33844 | A_09_P206585 | 1.224 | 1.74.E-03 | 3.20.E-02 |
| Sod      | CG11793_ESCL2_346  | 0.596 | 1.03E-08 | 1.46.E-04 | 33844 | A_09_P206585 | 1.224 | 1.74.E-03 | 3.20.E-02 |
| Sodh-2   | CG4649_ESCL1_1210  | 0.452 | 9.17E-07 | 1.20.E-02 | 22800 | A_09_P032981 | 1.154 | 6.39.E-04 | 1.94.E-02 |
| Sodh-2   | CG4649_ESCL2_1019  | 1.378 | 1.39E-45 | 3.10.E-41 | 22800 | A_09_P032981 | 1.154 | 6.39.E-04 | 1.94.E-02 |
| Spargel  | CG9809_ESCL1_4498  | 1.184 | 2.84E-22 | 5.36.E-18 | 42961 | A_09_P036066 | 0.788 | 2.64.E-03 | 3.82.E-02 |
|          |                    |       |          |           | 15141 | A_09_P036066 | 0.926 | 1.30.E-03 | 2.76.E-02 |
| Spargel  | CG9809_ESCL3_2983  | 0.449 | 1.83E-07 | 2.47.E-03 | 42961 | A_09_P036066 | 0.788 | 2.64.E-03 | 3.82.E-02 |
|          |                    |       |          |           | 15141 | A_09_P036066 | 0.926 | 1.30.E-03 | 2.76.E-02 |
| tej      | CG8589_ESCL1_1847  | 1.597 | 1.28E-45 | 2.84.E-41 | 43307 | A_09_P007621 | 1.178 | 3.66.E-04 | 1.48.E-02 |
|          |                    |       |          |           | 20904 | A_09_P007621 | 1.200 | 3.24.E-04 | 1.44.E-02 |
| tej      | CG8589_ESCL2_1599  | 1.637 | 1.75E-17 | 3.07.E-13 | 43307 | A_09_P007621 | 1.178 | 3.66.E-04 | 1.48.E-02 |
|          |                    |       |          |           | 20904 | A_09_P007621 | 1.200 | 3.24.E-04 | 1.44.E-02 |
| TM4SF    | CG11303_ESCL1_1417 | 1.885 | 1.93E-16 | 3.33.E-12 | 13973 | A_09_P032271 | 0.747 | 4.15.E-03 | 4.70.E-02 |
|          |                    |       |          |           | 40692 | A_09_P193295 | 0.748 | 3.75.E-03 | 4.46.E-02 |
| Vsx2     | CG15783_ESCL1_855  | 1.049 | 1.79E-25 | 3.51.E-21 | 17887 | A_09_P000916 | 1.027 | 4.65.E-03 | 4.99.E-02 |
| wcd      | CG7989_ESCL1_1443  | 0.426 | 9.67E-11 | 1.47.E-06 | 17401 | A_09_P032871 | 0.857 | 3.46.E-03 | 4.30.E-02 |
|          |                    |       |          |           | 3601  | A_09_P032871 | 0.898 | 2.95.E-03 | 4.01.E-02 |
| X11Lbeta | CG32677_ESCL1_4803 | 1.100 | 3.88E-11 | 5.94.E-07 | 20683 | A_09_P016181 | 0.741 | 3.75.E-03 | 4.46.E-02 |
|          |                    |       |          |           | 5628  | A_09_P110490 | 1.196 | 1.07.E-03 | 2.52.E-02 |
|          |                    |       |          |           | 31465 | A_09_P183230 | 1.412 | 2.33.E-04 | 1.25.E-02 |
|          |                    |       |          |           | 27079 | A_09_P162075 | 2.284 | 8.36.E-05 | 8.80.E-03 |
|          |                    |       |          |           | 20516 | A_09_P175655 | 2.529 | 1.48.E-04 | 1.05.E-02 |
| yip3     | CG13549_ESCL1_476  | 3.061 | 1.36E-32 | 2.85.E-28 | 15888 | A_09_P062256 | 0.891 | 4.42.E-03 | 4.86.E-02 |

Supplementary Table S7. Primer sequences for cloning *ovo* isoforms and for constructing gRNA expression vectors and EGFP knock-in constructs

| Primer name         | primer sequence (5'-3')*                                |
|---------------------|---------------------------------------------------------|
| ovoA5'-Fw           | ATGGTACCATGAACGTCACAAAAATGATCTTC                        |
| ovoA5'-Rv           | GCTTTGGATGAGTGGCTTTGTG                                  |
| ovoA3'-Fw           | CATCATTCGCACCATCATGG                                    |
| ovoA3'-Rv           | ATAAGCTTCTAATTGTGGACTGGCATGGG                           |
| ovo-probe-Fw        | ATGGTACCCTGATTACGCTGATATCCACCGC                         |
| ovo-probe-Rv        | ATGAGCTCATTTGTGGACTGGCATGGG                             |
| svb-probe-Fw        | ATGGATCCCGCTTAACCTCACCTGGGC                             |
| svb-probe-Rv        | ATAAGCTTCATTTCGACTTCCAAATCCG                            |
| ovoA-sp-Fw          | ATGGATCCCTTGCCCGTTTGTCTTTGC                             |
| ovoA-sp-Rv          | ATTCTAGAGCCCGTATTATAGAATCCGTGGG                         |
| ovoB-sp-Fw          | ATGGATCCACAGTTACATAAGCAATCCGCC                          |
| ovoB-sp-Rv          | ATTCTAGAGCCCGTATTATAGAATCCGTGGG                         |
| ovoA-e-gfp-sgRNA-Fw | CTTCTCCGTAAGAATATCCGAGAGA                               |
| ovoA-e-gfp-sgRNA-Rv | AAACTCTCTCGGATATTTCTTACGA                               |
| ovoA-up1kb-Fw       | GGGAACAAAAAGCTGGTGTGTGCTGGTGAATTCAMAATTTTAC             |
| ovoA-up1kb-Rv       | GCCCTTGCTCAGCATTTGCTGAGCGAACGGGATTTG                    |
| ovoA-dwn1kb-Fw      | GACGAGCTGTACAAGATGAACGTCACAAAAAATGATCTTCGCAAGAACAATCCGC |
| ovoA-dwn1kb-Rv      | GAGCGCGCGCTTTCAGCTTTGGTTTGAAAAAC                        |
| ovoA-dwn1kb-Rv      | TATAGGGCGAATTGGTGGGGATACTCCTTGCCGTTGG                   |

|                    |                                                            |
|--------------------|------------------------------------------------------------|
| ovoB-egfp-sgRNA-Fw | CTTCGGTATGGCGGTGTCGCCGA                                    |
| ovoB-egfp-sgRNA-Rv | AAACTCGCGACACCAGCCCATACC                                   |
| ovoB-up1kb-Fw      | <u>GGGAACAAAAAGCTGGCAGAGCCCGCCACCTCCG</u>                  |
| ovoB-up1kb-Rv      | <u>GCCCTTGCTCACCAATACCAACCCGCAACCG</u>                     |
| ovoB-dwn1kb-Fw     | <u>GACGAGCTGTACAAGATGGGCGCGCCCGGATGGCCGAGGGAACCTACGGAC</u> |
| ovoB-dwn1kb-Rv     | <u>TATAGGGCGAATTGGGCTGCTGCTGCTGATTGCTG</u>                 |
| PEGFP-N1-Fw        | ATGGTGAGCCAAGGGCGAGG                                       |
| PEGFP-N1-Rv        | CTTGACAGCTCGTCCATGCCG                                      |
| pBlue-Fw           | CCAGCTTTTGTTCCTTTAGTGAGG                                   |
| pBlue-Rv           | CCAATTCCGCCCTATAGTGAGTCGT                                  |

\* Recognition sequences of restriction enzyme (*KpnI*, *HindIII*, *SacI*, *BamHI*, and *XbaI*) are underlined. The overlapping ends for Gibson Assembly are double underlined. To avoid re-cutting of the knock-in allele by gRNA and Cas9, synonymous base substitutions were introduced (**bold**). The sequences annealing to genomic DNA are indicated in italics.

Supplementary Table S8. Primer sequences for qRT-PCR

| Primer name | Primer sequence (5'-3')   |
|-------------|---------------------------|
| ovo-A-Fw    | TTGCCCGTTTTGTCTTTGC       |
| ovo-A-Rv    | TGCTGAGCGAACGGATTG        |
| ovo-B-Fw *  | GACAAATTTCTGAGAATCGCACTTC |
| ovo-B-Rv *  | TATTTTGTGCAGTGGTGGCAG     |
| rp49-Fw     | AGCGCACCAAGCACTTCATC      |
| rp49-Rv     | GACGCACTCTGTTGTCGATACC    |
| vas-Fw      | TGGAAGACCCCAGGTAGTGATTGTA |
| vas-Rv      | AACGAGGTGCCTCCGTAAACAATA  |
| nos-Fw      | ACACGATTAAGTACTGCCCAAGAA  |
| nos-Rv      | CGCCCTCTCTAAACCTTCATCTGTT |
| CG14967-Fw  | TCTGAACAAGATTCGTCCTTGCCTA |
| CG14967-Rv  | GCATTGTTGATGACCAGACTTAGGG |

\* The ovo-B-Fw/ovo-B-Rv primer pair detects two types of *ovo-B* transcripts, *ovo-RA* (FBtr0070740) and *ovo-RD* (FBtr0100408), according to FlyBase (<http://flybase.org>). *ovo-RA* and *ovo-RD* encode almost identical proteins, and no functional differences have been reported. Only 53 amino acids is inserted in the protein encoded by *ovo-RA*.

### *Supplementary References*

1. Gratz, S. J. *et al.* Highly specific and efficient CRISPR/Cas9-catalyzed homology-directed repair in *Drosophila*. *Genetics* **196**, 961–971 (2014).
2. Kondo, S. & Ueda, R. Highly Improved gene targeting by germline-specific Cas9 expression in *Drosophila*. *Genetics* **195**, 715–721 (2013).
3. Kobayashi, S., Amikura, R., Nakamura, A. & Lasko, P. F. Techniques for analysing protein and RNA distribution in *Drosophila* ovaries and embryos at structural and ultrastructural resolution in *A comparative methods approach to the study of oocytes and embryos* (ed. Richter, J. D.) 426–445 (Oxford University Press, 1999).
4. Hayashi, Y., Hayashi, M. & Kobayashi, S. Nanos suppresses somatic cell fate in *Drosophila* germ line. *Proc. Natl. Acad. Sci. U. S. A.* **101**, 10338–10342 (2004).
5. Brown, N. H. & Kafatos, F. C. Functional cDNA libraries from *Drosophila* embryos. *J. Mol. Biol.* **203**, 425–437 (1988).
6. Shigenobu, S., Arita, K., Kitadate, Y., Noda, C. & Kobayashi, S. Isolation of germline cells from *Drosophila* embryos by flow cytometry. *Dev. Growth Differ.* **48**, 49–57 (2006).

7. Hashiyama, K., Hayashi, Y. & Kobayashi, S. *Drosophila Sex lethal* gene initiates female development in germline progenitors. *Science* **333**, 885–888 (2011).
8. Storey, J. D. & Tibshirani, R. Statistical significance for genomewide studies. *Proc. Natl. Acad. Sci. U. S. A.* **100**, 9440–9445 (2003).
